# Supplementary material
Source: Royal Society of Chemistry journal article supplement (doi:10.1039/d6ob00329j)

## Supporting Information

### KBr-Enabled electrochemical transformation of alkynes into $\alpha$ -bromoketones/1,2-diketones

Yulin Li,<sup>†a</sup> Siyu Lei<sup>†b</sup> and Yuexia Zhang<sup>\*a</sup>

<sup>a</sup>College of Chemistry and Chemical Engineering, Qingdao University, 308 Ningxia Road, Qingdao 266071, China.

<sup>b</sup>Dushanzi Petrochemical Company, China National Petroleum Corporation, No. 6 Beijing Road, Dushanzi District, Karamay 833699, China.

*E-mail:* [zhangyx@qdu.edu.cn](mailto:zhangyx@qdu.edu.cn)

## Table of Contents

|                                                                               |     |
|-------------------------------------------------------------------------------|-----|
| 1. General Information.....                                                   | S3  |
| 2. General Procedures for Products .....                                      | S4  |
| 2.1 General procedures for $\alpha$ -bromoketones.....                        | S4  |
| 2.2 General procedures for diketones. ....                                    | S5  |
| 3. Additional Optimization Experiments .....                                  | S7  |
| 4. Mechanistic Analysis .....                                                 | S10 |
| 4.1 Deuterium-labelling experiments.....                                      | S10 |
| 4.2 Free radical scavenging and trapping experiment .....                     | S12 |
| 5. Derivatization Experiments .....                                           | S14 |
| 6. Reference .....                                                            | S17 |
| 7. Characterizations Data for Products .....                                  | S18 |
| 8. $^1\text{H}$ NMR, $^{13}\text{C}$ NMR and $^{19}\text{F}$ NMR Spectra..... | S30 |

## 1. General Information

All reagents and solvents were purchased from J&K Chemicals, Energy Chemical or other commercial suppliers and used as received without further purification. The constant voltage was provided by GWINSTEK PSR 60-6. Proton nuclear magnetic resonance ( $^1\text{H}$  NMR) spectra were recorded on a Bruker Avance III HD 400 (400 MHz) spectrometer, Bruker Avance 500 (500 MHz) spectrometer or Bruker Avance 600 (600 MHz) spectrometer. Chemical shifts were recorded in parts per million (ppm,  $\delta$ ) relative to tetramethylsilane ( $\delta$  0.00).  $^1\text{H}$  NMR splitting patterns are designated as singlet (s), doublet (d), triplet (t), quartet (q), dd (doublet of doublets); m (multiplets), and etc. All first-order splitting patterns were assigned on the basis of the appearance of the multiplet. Splitting patterns that could not be easily interpreted are designated as multiplet (m) or broad (br). Carbon nuclear magnetic resonance ( $^{13}\text{C}$  NMR) spectra were recorded on a Bruker Avance III HD 400 (100 MHz), Bruker Avance 500 (125 MHz) spectrometer or Bruker Avance 600 (150 MHz) spectrometer. High resolution mass spectral analysis (HRMS) was performed on an Ultima Global spectrometer with an ESI source. Flash chromatography was performed using Qingdao Haiyang silica gel 100 - 200 with distilled solvents. Visualization was performed using a UV lamp.

## 2. General Procedures for Products

### 2.1 General procedures for $\alpha$ -bromoketones.

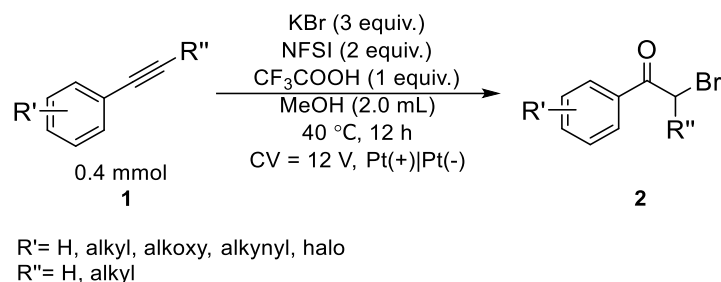

To a dry three-necked flask equipped with a magnetic stir bar, was added **1** (0.4 mmol), KBr (142.8 mg, 3 equiv.), NFSI (252.3 mg, 2 equiv.), CF<sub>3</sub>COOH (30  $\mu$ L, 1 equiv.) and MeOH (2 mL). The mixture was stirred in a pre-heated oil bath at 40 °C for 12 h under 12 V with Pt(+)|Pt(-). The reaction mixture was concentrated under reduced pressure and purified by column chromatography on silica gel (Eluent: petroleum ether/ethyl acetate = 60:1 or 20:1, v/v) to afford  $\alpha$ -bromoketones **2**.

#### a) General procedure for **2b**.

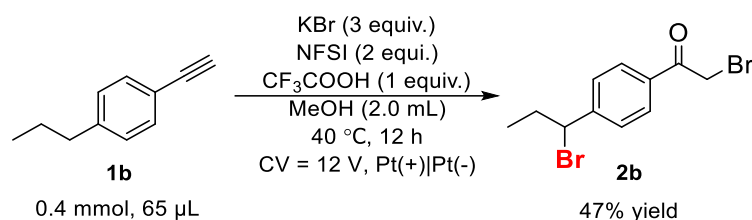

To a dry three-necked flask equipped with a magnetic stir bar, was added **1b** (0.4 mmol, 65  $\mu$ L), KBr (142.8 mg, 3 equiv.), NFSI (252.3 mg, 2 equiv.), CF<sub>3</sub>COOH (30  $\mu$ L, 1 equiv.) and MeOH (2 mL). The mixture was stirred in a pre-heated oil bath at 40 °C for 12 h under 12 V with Pt(+)|Pt(-). The reaction mixture was concentrated under reduced pressure and purified by column chromatography on silica gel (Eluent: petroleum ether/ethyl acetate = 50:1, v/v) to afford **2b** as slight yellow oil, 44.9 mg, 47% yield.

#### b) General procedure for **2s**.

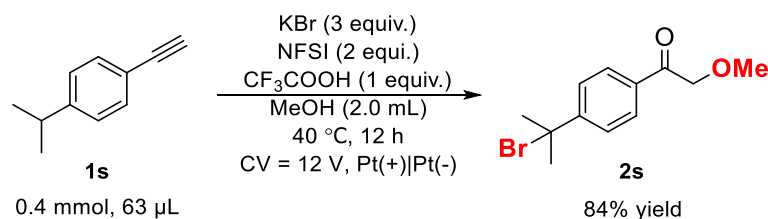

To a dry three-necked flask equipped with a magnetic stir bar, was added **1s** (0.4 mmol,

63  $\mu\text{L}$ ), KBr (142.8 mg, 3 equiv.), NFSI (252.3 mg, 2 equiv.),  $\text{CF}_3\text{COOH}$  (30  $\mu\text{L}$ , 1 equiv.) and MeOH (2 mL). The mixture was stirred in a pre-heated oil bath at 40  $^\circ\text{C}$  for 12 h under 12 V with Pt(+)|Pt(-). The reaction mixture was concentrated under reduced pressure and purified by column chromatography on silica gel (Eluent: petroleum ether/ethyl acetate = 30:1, v/v) to afford **2s** as slight yellow oil, 91.1 mg, 84% yield.

**c) General procedure for 2t.**

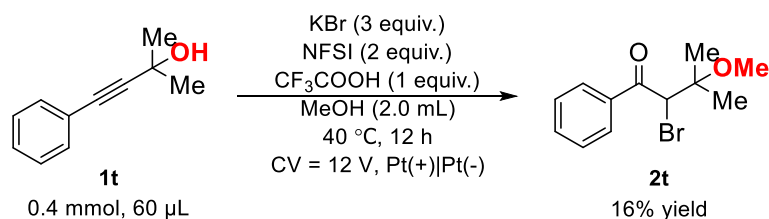

To a dry three-necked flask equipped with a magnetic stir bar, was added **1t** (0.4 mmol, 60  $\mu\text{L}$ ), KBr (142.8 mg, 3 equiv.), NFSI (252.3 mg, 2 equiv.),  $\text{CF}_3\text{COOH}$  (30  $\mu\text{L}$ , 1 equiv.) and MeOH (2 mL). The mixture was stirred in a pre-heated oil bath at 40  $^\circ\text{C}$  for 12 h under 12 V with Pt(+)|Pt(-). The reaction mixture was concentrated under reduced pressure and purified by column chromatography on silica gel (Eluent: petroleum ether/ethyl acetate = 60:1, v/v) to afford **2t** as slight yellow oil, 16.9 mg, 16% yield.

**2.2 General procedures for diketones.**

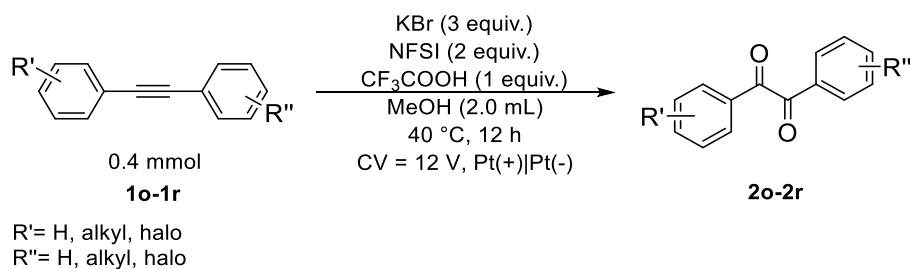

To a dry three-necked flask equipped with a magnetic stir bar, was added **1o-1r** (0.4 mmol), KBr (142.8 mg, 3 equiv.), NFSI (252.3 mg, 2 equiv.),  $\text{CF}_3\text{COOH}$  (30  $\mu\text{L}$ , 1 equiv.) and MeOH (2 mL). The mixture was stirred in a pre-heated oil bath at 40  $^\circ\text{C}$  for 12 h under 12 V with Pt(+)|Pt(-). The reaction mixture was concentrated under reduced pressure and purified by column chromatography on silica gel (Eluent: petroleum ether/ethyl acetate = 60:1 or 20:1) to afford **2o-2r**.

a) General procedure for **2u**.

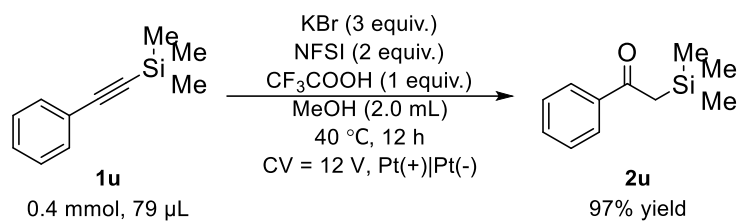

To a dry three-necked flask equipped with a magnetic stir bar, was added **1u** (0.4 mmol, 79  $\mu$ L), KBr (142.8 mg, 3 equiv.), NFSI (252.3 mg, 2 equiv.),  $\text{CF}_3\text{COOH}$  (30  $\mu$ L, 1 equiv.) and MeOH (2 mL). The mixture was stirred in a pre-heated oil bath at 40  $^\circ\text{C}$  for 12 h under 12 V with Pt(+)|Pt(-). The reaction mixture was concentrated under reduced pressure and purified by column chromatography on silica gel (Eluent: petroleum ether/ethyl acetate = 60:1 ) to afford **2u** as yellow oil, 77.4 mg, 97% yield.

### 3. Additional Optimization Experiments

#### a) General procedure for optimization of oxidant:

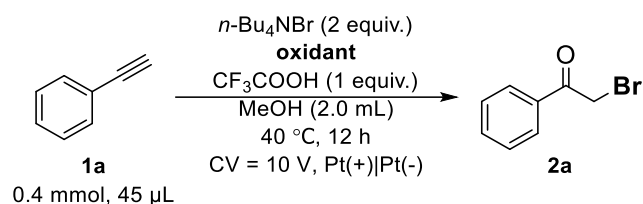

To a dry three-necked flask equipped with a magnetic stir bar, was added **1a** (0.4 mmol, 45  $\mu$ L),  $n\text{-Bu}_4\text{NBr}$  (257.9 mg, 2 equiv.), **oxidant**,  $\text{CF}_3\text{COOH}$  (30  $\mu$ L, 1 equiv.) and MeOH (2 mL). The mixture was stirred in a pre-heated oil bath at 40  $^\circ\text{C}$  for 12 h under 10 V with Pt(+)|Pt(-). The reaction mixture was concentrated under reduced pressure and purified by column chromatography on silica gel (Eluent: petroleum ether/ethyl acetate = 60:1, v/v) to afford  $\alpha$ -bromoketone **2a**.

**Table S1: Optimization of oxidant:**

| Entry | Oxidant (equiv.)                     | Yield (%) |
|-------|--------------------------------------|-----------|
| 1     | NFSI (1)                             | 38        |
| 2     | $\text{K}_2\text{S}_2\text{O}_8$ (1) | 22        |
| 3     | DTBP (1)                             | 21        |
| 4     | TBHP (1)                             | 3         |
| 5     | DDQ (1)                              | 7         |
| 6     | $\text{NaNO}_2$ (1)                  | 2         |
| 7     | NFSI (0)                             | 22        |
| 8     | NFSI (2)                             | 70        |
| 9     | NFSI (3)                             | 18        |

#### b) General procedure for optimization of solvent:

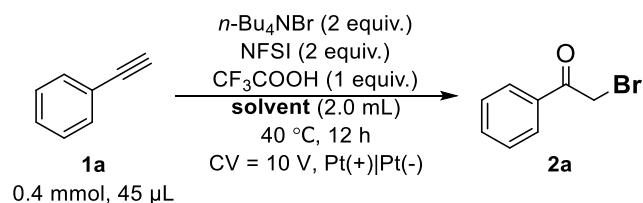

To a dry three-necked flask equipped with a magnetic stir bar, was added **1a** (0.4 mmol, 45  $\mu$ L),  $n\text{-Bu}_4\text{NBr}$  (257.9 mg, 2 equiv.), NFSI (252.3 mg, 2 equiv.),  $\text{CF}_3\text{COOH}$  (30  $\mu$ L, 1 equiv.) and **solvent** (2 mL). The mixture was stirred in a pre-heated oil bath at 40  $^\circ\text{C}$  for 12 h under 10 V with Pt(+)|Pt(-). The reaction mixture was concentrated under reduced pressure and purified by column chromatography on silica gel (Eluent:

petroleum ether/ethyl acetate = 60:1, v/v) to afford  $\alpha$ -bromoketone **2a**.

**Table S2: Optimization of solvent:**

| Entry | Solvent (2.0 mL)            | Yield (%) |
|-------|-----------------------------|-----------|
| 1     | CH <sub>3</sub> CN          | 0         |
| 2     | DCM                         | 0         |
| 3     | Toluene                     | 0         |
| 4     | THF                         | 0         |
| 5     | MeOH                        | 70        |
| 6     | MeOH:H <sub>2</sub> O=100:1 | 63        |
| 7     | MeOH:H <sub>2</sub> O=50:1  | 57        |
| 8     | H <sub>2</sub> O            | 0         |

**c) General procedure for optimization of electrolyte:**

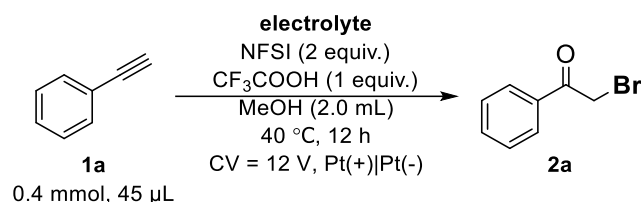

To a dry three-necked flask equipped with a magnetic stir bar, was added **1a** (0.4 mmol, 45 µL), **electrolyte**, NFSI (252.3 mg, 2 equiv.), CF<sub>3</sub>COOH (30 µL, 1 equiv.) and MeOH (2 mL). The mixture was stirred in a pre-heated oil bath at 40 °C for 12 h under 12 V with Pt(+)|Pt(-). The reaction mixture was concentrated under reduced pressure and purified by column chromatography on silica gel (Eluent: petroleum ether/ethyl acetate = 60:1, v/v) to afford  $\alpha$ -bromoketone **2a**.

**Table S3: Optimization of electrolyte:**

| Entry | Electrolyte (equiv.)              | Yield (%) |
|-------|-----------------------------------|-----------|
| 1     | <i>n</i> -Bu <sub>4</sub> NBr (2) | 71        |
| 2     | KBr (1)                           | 51        |
| 3     | KBr (2)                           | 94        |
| 4     | KBr (3)                           | 98        |

**d) General procedure for optimization of electrode:**

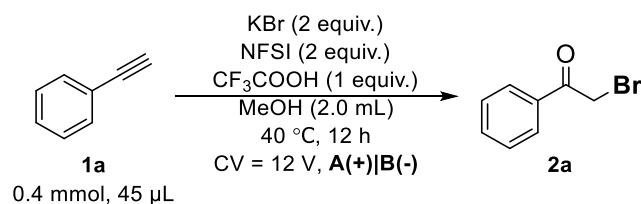

To a dry three-necked flask equipped with a magnetic stir bar, was added **1a** (0.4 mmol,

45  $\mu$ L), KBr (95.2 mg, 2 equiv.), NFSI (252.3 mg, 2 equiv.), CF<sub>3</sub>COOH (30  $\mu$ L, 1 equiv.) and MeOH (2 mL). The mixture was stirred in a pre-heated oil bath at 40 °C for 12 h under 12 V with different electrode. The reaction mixture was concentrated under reduced pressure and purified by column chromatography on silica gel (Eluent: petroleum ether/ethyl acetate = 60:1, v/v) to afford  $\alpha$ -bromoketone **2a**.

**Table S4: Optimization of electrode:**

| Entry | Electrode   | Yield (%) |
|-------|-------------|-----------|
| 1     | Pt(+) Pt(-) | 94        |
| 2     | C(+) Ni(-)  | 41        |
| 3     | C(+) Ag(-)  | 34        |
| 4     | C(+) C(-)   | 6         |
| 5     | C(+) Cu(-)  | 43        |
| 6     | Pt(+) Cu(-) | 43        |

## 4. Mechanistic Analysis

### 4.1 Deuterium-labelling experiments

#### a) CD<sub>3</sub>OD instead of CH<sub>3</sub>OH

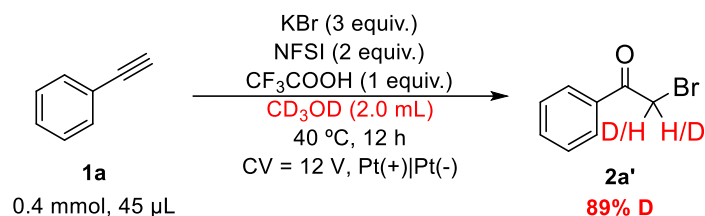

To a dry three-necked flask equipped with a magnetic stir bar, was added **1a** (0.4 mmol), KBr (142.8 mg, 3 equiv.), NFSI (252.3 mg, 2 equiv.), CF<sub>3</sub>COOH (30  $\mu$ L, 1 equiv.) and CD<sub>3</sub>OD (2 mL). The mixture was stirred in a pre-heated oil bath at 40 °C for 12 h under 12 V with Pt(+)|Pt(-). The reaction mixture was concentrated under reduced pressure and purified by column chromatography on silica gel (Eluent: petroleum ether/ethyl acetate = 60:1, v/v). The resulting crude product was dissolved in CDCl<sub>3</sub> for crude <sup>1</sup>H NMR analysis.

#### Crude <sup>1</sup>H NMR (400 MHz, CDCl<sub>3</sub>)

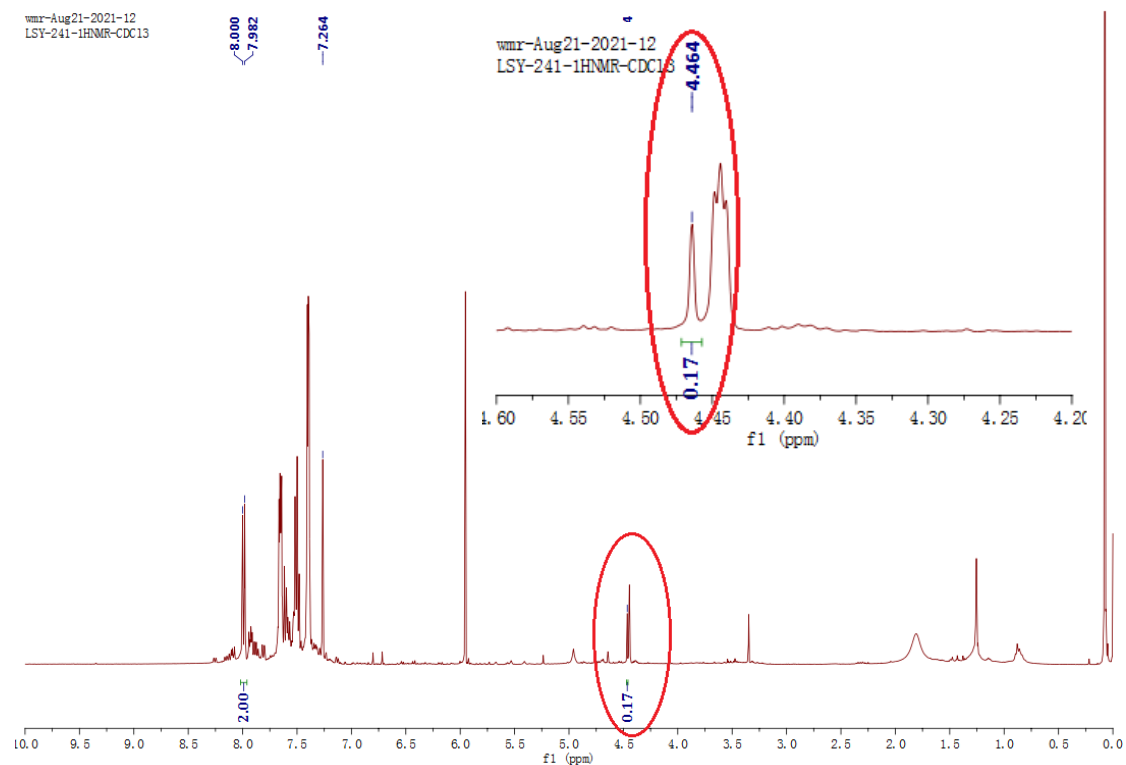

## b) MeOH + D<sub>2</sub>O

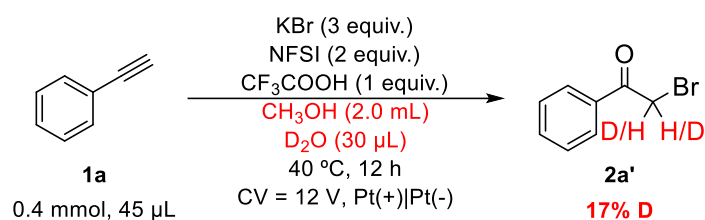

To a dry three-necked flask equipped with a magnetic stir bar, was added **1a** (0.4 mmol), KBr (142.8 mg, 3 equiv.), NFSI (252.3 mg, 2 equiv.), CF<sub>3</sub>COOH (30  $\mu\text{L}$ , 1 equiv.), MeOH (2 mL) and D<sub>2</sub>O (30  $\mu\text{L}$ ), The mixture was stirred in a pre-heated oil bath at 40 °C for 12 h under 12 V with Pt(+)|Pt(-). The reaction mixture was concentrated under reduced pressure and purified by column chromatography on silica gel (Eluent: petroleum ether/ethyl acetate = 60:1 or 20:1, v/v). The resulting crude product was dissolved in CDCl<sub>3</sub> for crude <sup>1</sup>H NMR analysis.

### Crude <sup>1</sup>H NMR (400 MHz, CDCl<sub>3</sub>)

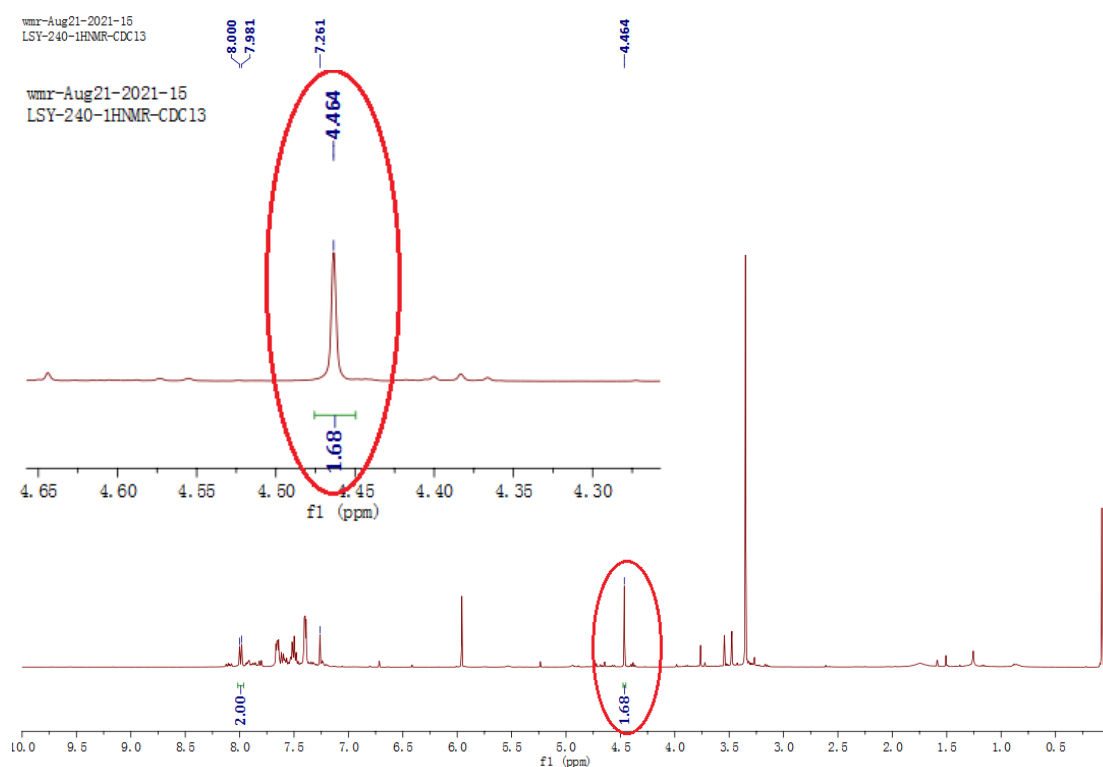

## 4.2 Free radical scavenging and trapping experiment

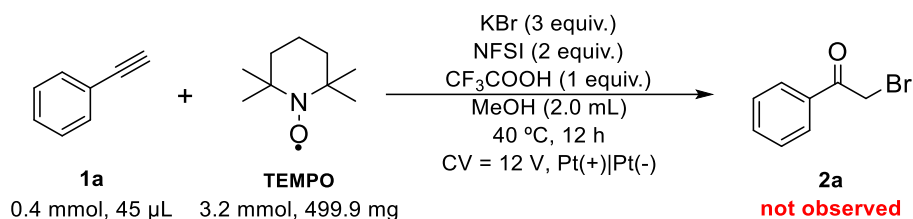

To a dry three-necked flask equipped with a magnetic stir bar, was added **1a** (0.4 mmol, 45  $\mu\text{L}$ ), KBr (142.8 mg, 3 equiv.), NFSI (252.3 mg, 2 equiv.),  $\text{CF}_3\text{COOH}$  (30  $\mu\text{L}$ , 1 equiv.), 2,2,6,6-Tetramethyl-1-piperidinyloxy (TEMPO, 499.9 mg, 8 equiv.) and MeOH (2 mL), The mixture was stirred in a pre-heated oil bath at 40  $^\circ\text{C}$  for 12 h under 12 V with Pt(+)|Pt(-). The reaction mixture was monitored using an UV lamp. And the product **2a** was not observed. Free radical scavenging experiment showed difunctionalization of phenylacetylene alkyne **1a** was inhibited by adding 8 equiv 2,2,6,6-tetramethylpiperidinoxy (TEMPO) into reaction. So such reactions were likely to involve free radicals.

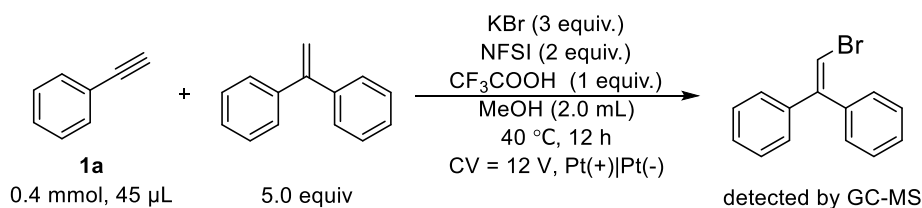

To a dry three-necked flask equipped with a magnetic stir bar, was added **1a** (0.4 mmol, 45  $\mu\text{L}$ ), KBr (142.8 mg, 3 equiv.), NFSI (252.3 mg, 2 equiv.),  $\text{CF}_3\text{COOH}$  (30  $\mu\text{L}$ , 1 equiv.), 1,1-diphenylethylene (881  $\mu\text{L}$ , 5 equiv.) and MeOH (2 mL), The mixture was stirred in a pre-heated oil bath at 40  $^\circ\text{C}$  for 12 h under 12 V with Pt(+)|Pt(-). Crude product was analyzed by GC-MS.

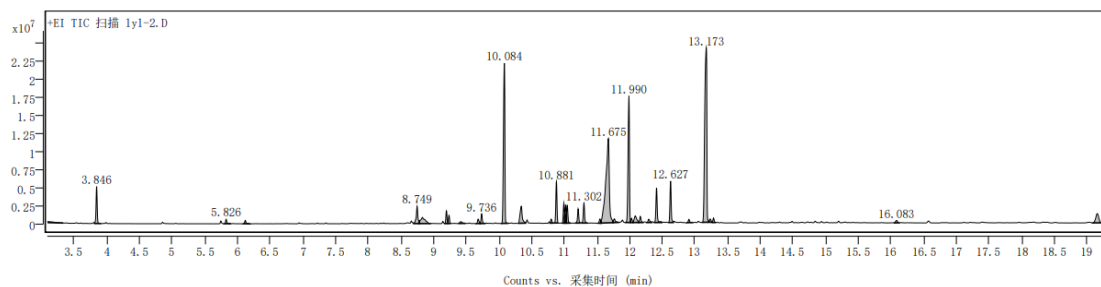

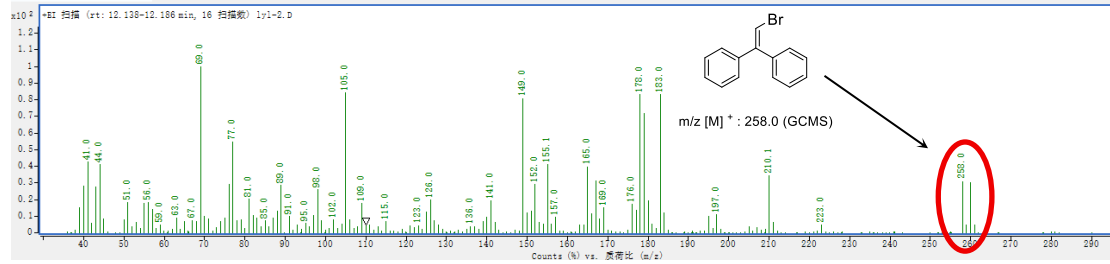

## 5. Derivatization Experiments

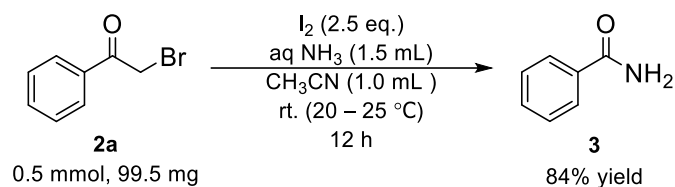

To a dry schlenk tube with a magnetic stir bar, was added **2a** (0.5 mmol, 99.5 mg),  $I_2$  (1.25 mmol, 317.3 mg),  $NH_3$  (aq, 1.5 mL) and  $CH_3CN$  (1.0 mL). The mixture was stirred at room temperature (20-25 °C) for 12 h. The solvent was removed by rotate evaporation. The mixture was purified by column chromatography on silica gel (Eluent: petroleum ether/ethyl acetate = 3:1, v/v) to afford **3**, 84% yield.

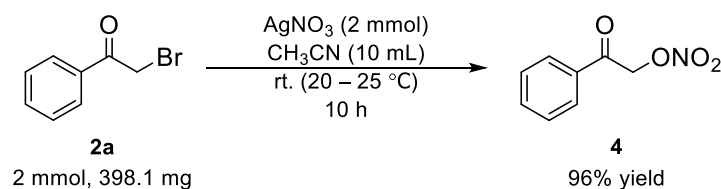

To a dry flask (50 mL) with a magnetic stir bar, was added **2a** (2 mmol, 398.1 mg),  $AgNO_3$  (2 mmol, 339.8 mg) and  $CH_3CN$  (10 mL). The mixture was stirred at room temperature (20-25 °C) for 10 h. Completion of the reaction after TLC. DCM was added and stirred for 10 min.  $AgBr$  was deposited at rest. The resulting solution was removed by rotate evaporation. The mixture was purified by column chromatography on silica gel (Eluent: petroleum ether/ethyl acetate = 8:1, v/v) to afford **4**, 96% yield.

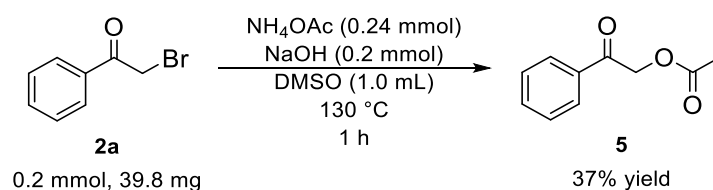

To a dry schlenk tube with a magnetic stir bar, was added **2a** (0.2 mmol, 39.8 mg),  $NH_4OAc$  (0.24 mmol, 18.5 mg),  $NaOH$  (0.2 mmol, 8.0 mg) and  $DMSO$  (1.0 mL). The mixture was stirred in a pre-heated oil bath at 130 °C for 1 h. Then the reaction was quenched with water (5 mL) and the organic phase was extracted with ethyl acetate. The solvent was removed by rotate evaporation. The mixture was purified by column chromatography on silica gel (Eluent: petroleum ether/ethyl acetate = 8:1, v/v) to afford **5**, 37% yield.

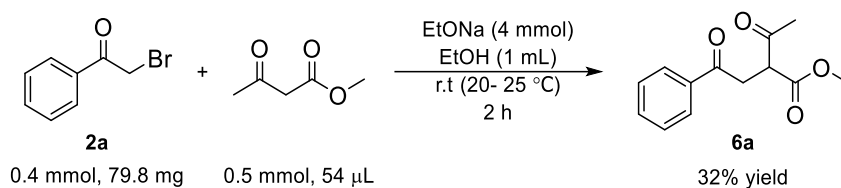

To a dry schlenk tube with a magnetic stir bar, was added EtONa (4 mmol, 272.2 mg) and EtOH (1.0 mL). Then methyl acetoacetate (0.5 mmol, 54  $\mu$ L) was added to the solution drop by drop. The mixture was stirred at room temperature for 10 min. **2a** (0.4 mmol, 79.8 mg) was soluble in EtOH (2 mL). Mixing the above two solutions and stirring for 2 h. The reaction was quenched with water and the organic phase was extracted with ethyl acetate. The solvent was removed by rotate evaporation. The mixture was purified by column chromatography on silica gel (Eluent: petroleum ether/ethyl acetate = 10:1, v/v) to afford **6a**, 32% yield.

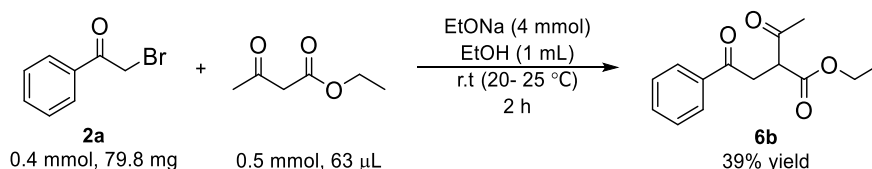

To a dry schlenk tube with a magnetic stir bar, was added EtONa (4 mmol, 272.2 mg) and EtOH (1.0 mL). Then ethyl acetoacetate (0.5 mmol, 63  $\mu$ L) was added to the solution drop by drop. The mixture was stirred at room temperature for 10 min. **2a** (0.4 mmol, 79.8 mg) was soluble in EtOH (2 mL). Mixing the above two solutions and stirring for 2 h. The reaction was quenched with water and the organic phase was extracted with ethyl acetate. The solvent was removed by rotate evaporation. The mixture was purified by column chromatography on silica gel (Eluent: petroleum ether/ethyl acetate = 10:1, v/v) to afford **6b**, 39% yield.

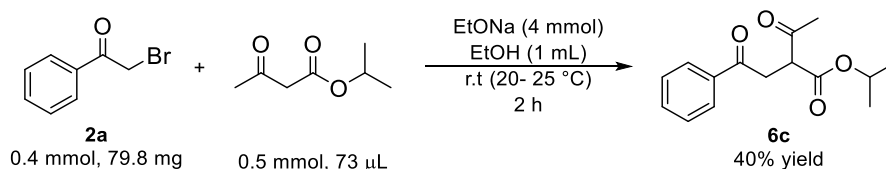

To a dry schlenk tube with a magnetic stir bar, was added EtONa (4 mmol, 272.2 mg) and EtOH (1.0 mL). Then isopropyl acetoacetate (0.5 mmol, 73  $\mu$ L) was added to the solution drop by drop. The mixture was stirred at room temperature for 10 min. **2a** (0.4 mmol, 79.8 mg) was soluble in EtOH (2 mL). Mixing the above two solutions and

stirring for 2 h. The reaction was quenched with water and the organic phase was extracted with ethyl acetate. The solvent was removed by rotate evaporation. The mixture was purified by column chromatography on silica gel (Eluent: petroleum ether/ethyl acetate = 10:1, v/v) to afford **6c**, 40% yield.

## 6. Reference

1. S. Shohei, K. Yuhsuke, M. Katsuhiko, T. Hideo, *Org. Lett.*, 2016, **18**, 784-787.
2. R. N. Ram and V. K. Soni, *J. Org. Chem.*, 2015, **80**, 8922-8928.
3. C. Liu, J. Zhao, Y. Qiao, W. Huang, Z. Rao, Y. Gu, *Tetrahedron.*, 2018, **74**, 7351-7357.

## 7. Characterizations Data for Products

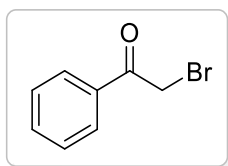

**2a**

### **2-bromo-1-phenylethan-1-one:**

Following the general procedure, compound **2a** was obtained by column chromatography on silica gel (Eluent: petroleum ether/ethyl acetate = 60:1, v/v), 68.8 mg, 98% yield, white solid, melting point: 47.6 °C.

$^1\text{H NMR}$  (500 MHz,  $\text{CDCl}_3$ )  $\delta$  8.15 – 7.91 (m, 2H), 7.62 (t,  $J = 7.5$  Hz, 1H), 7.50 (t,  $J = 7.8$  Hz, 2H), 4.46 (s, 2H).

$^{13}\text{C NMR}$  (100 MHz,  $\text{CDCl}_3$ )  $\delta$  191.3, 133.9, 133.9, 128.9, 128.9, 30.9.

**HRMS** (ESI-TOF)  $[\text{M} + \text{Na}]^+$  Calcd. for  $\text{C}_8\text{H}_7\text{BrO}$ , 220.9577; Found 220.9588.

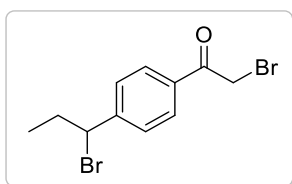

**2b**

### **2-bromo-1-(4-(1-bromopropyl)phenyl)ethan-1-one:**

Following the general procedure, compound **2b** was obtained by column chromatography on silica gel (Eluent: petroleum ether/ethyl acetate = 60:1, v/v), 44.9 mg, 47% yield, slight yellow oil.

$^1\text{H NMR}$  (400 MHz,  $\text{CDCl}_3$ )  $\delta$  7.97 (d,  $J = 8.4$  Hz, 2H), 7.51 (d,  $J = 8.4$  Hz, 2H), 4.88 (dd,  $J = 8.0, 6.8$  Hz, 1H), 4.43 (s, 2H), 2.50 – 2.21 (m, 1H), 2.23 – 1.99 (m, 1H), 1.02 (t,  $J = 7.2$  Hz, 3H).

$^{13}\text{C NMR}$  (100 MHz,  $\text{CDCl}_3$ )  $\delta$  190.6, 148.1, 133.6, 129.4, 127.9, 55.5, 32.9, 30.7, 12.8.

**HRMS** (ESI-TOF)  $[\text{M} + \text{Na}]^+$  Calcd for  $\text{C}_{11}\text{H}_{12}\text{Br}_2\text{O}$ , 340.9152; Found 340.9152.

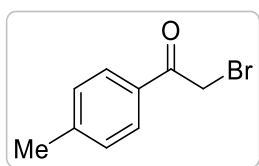

**2c**

**2-bromo-1-(p-tolyl)ethan-1-one:**

Following the general procedure, compound **2c** was obtained by column chromatography on silica gel (Eluent: petroleum ether/ethyl acetate = 60:1, v/v), 72.2 mg, 85% yield, slight yellow solid, melting point: 50.9 °C.

<sup>1</sup>H NMR (400 MHz, CDCl<sub>3</sub>) δ 7.97 (d, *J* = 8.4 Hz, 2H), 7.51 (d, *J* = 8.4 Hz, 2H), 4.88 (dd, *J* = 8.0, 6.8 Hz, 1H), 4.43 (s, 2H), 2.50 – 2.21 (m, 1H), 2.23 – 1.99 (m, 1H), 1.02 (t, *J* = 7.2 Hz, 3H).

<sup>13</sup>C NMR (100 MHz, CDCl<sub>3</sub>) δ 190.9, 145.0, 131.4, 129.5, 129.0, 30.9, 21.7.

HRMS (ESI-TOF) [M + Na]<sup>+</sup> Calcd. for C<sub>9</sub>H<sub>9</sub>BrO, 234.9734; Found 234.9718.

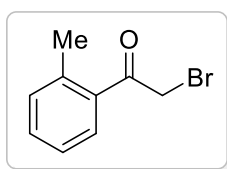

**2d**

**2-bromo-1-(o-tolyl)ethan-1-one:**

Following the general procedure, compound **2d** was obtained by column chromatography on silica gel (Eluent: petroleum ether/ethyl acetate = 60:1, v/v), and then purified by silica gel plate (Eluent: petroleum ether/ethyl acetate = 10:1, v/v), 78.1 mg, 92% yield, yellow oil.

<sup>1</sup>H NMR (400 MHz, CDCl<sub>3</sub>) δ 7.67 (d, *J* = 8.4 Hz, 1H), 7.43 (t, *J* = 7.6 Hz, 1H), 7.32 – 7.27 (m, 2H), 4.43 (s, 2H), 2.53 (s, 3H).

<sup>13</sup>C NMR (101 MHz, CDCl<sub>3</sub>) δ 194.2, 139.7, 134.4, 132.33, 132.31, 128.9, 125.8, 33.7, 21.4.

HRMS (ESI-TOF) [M + Na]<sup>+</sup> Calcd. for C<sub>9</sub>H<sub>9</sub>BrO, 234.9734; Found 234.9726.

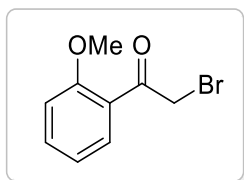

**2e**

**2-bromo-1-(2-methoxyphenyl)ethan-1-one:**

Following the general procedure, compound **2e** was obtained by column chromatography on silica gel (Eluent: petroleum ether/ethyl acetate = 60:1, v/v), 71.9 mg, 78% yield, slight yellow solid, melting point: 43.1 °C.

<sup>1</sup>H NMR (500 MHz, CDCl<sub>3</sub>) δ 7.83 (dd, *J* = 7.8, 2.0 Hz, 1H), 7.52 (m, 1H), 7.13 – 6.80 (m, 2H), 4.61 (s, 2H), 3.95 (s, 3H).

<sup>13</sup>C NMR (100 MHz, CDCl<sub>3</sub>) δ 192.3, 158.8, 134.7, 131.5, 124.8, 121.1, 111.6, 55.7, 37.7.

HRMS (ESI-TOF) [M + Na]<sup>+</sup> Calcd. for C<sub>9</sub>H<sub>9</sub>BrO<sub>2</sub>, 250.9683; Found 250.9701.

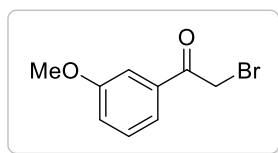

**2f**

#### **2-bromo-1-(3-methoxyphenyl)ethan-1-one:**

Following the general procedure, compound **2f** was obtained by column chromatography on silica gel (Eluent: petroleum ether/ethyl acetate = 60:1, v/v), 44.8 mg, 49% yield, slight yellow solid, melting point: 64.5 °C.

<sup>1</sup>H NMR (400 MHz, CDCl<sub>3</sub>) δ 7.55 (d, *J* = 8.0 Hz, 1H), 7.52 – 7.48 (m, 1H), 7.40 (t, *J* = 8.0 Hz, 1H), 7.15 (dd, *J* = 8.4 Hz, 1H), 4.45 (s, 2H), 3.86 (s, 3H).

<sup>13</sup>C NMR (100 MHz, CDCl<sub>3</sub>) δ 191.1, 159.9, 135.2, 129.8, 121.4, 120.5, 113.0, 55.5, 30.9.

HRMS (ESI-TOF) [M + Na]<sup>+</sup> Calcd. for C<sub>9</sub>H<sub>9</sub>BrO<sub>2</sub>, 250.9683; Found 250.9673.

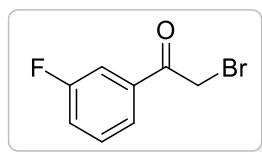

**2g**

#### **2-bromo-1-(3-fluorophenyl)ethan-1-one:**

Following the general procedure, compound **2g** was obtained by column chromatography on silica gel (Eluent: petroleum ether/ethyl acetate = 60:1, v/v), 64.0 mg, 74% yield, yellow oil.

<sup>1</sup>H NMR (500 MHz, CDCl<sub>3</sub>) δ 7.90 – 7.74 (m, 1H), 7.67 (m, 1H), 7.48 (m, 1H), 7.32 (m, 1H), 4.43 (s, 2H).

$^{13}\text{C}$  NMR (100 MHz,  $\text{CDCl}_3$ )  $\delta$  190.1 (d,  $J_{\text{C-F}} = 2.3$  Hz), 162.8 (d,  $J_{\text{C-F}} = 247.3$  Hz), 135.9 (d,  $J_{\text{C-F}} = 6.4$  Hz), 130.6 (d,  $J_{\text{C-F}} = 7.7$  Hz), 124.7 (d,  $J_{\text{C-F}} = 3.0$  Hz), 121.0 (d,  $J_{\text{C-F}} = 21.3$  Hz), 115.7 (d,  $J_{\text{C-F}} = 22.5$  Hz), 30.5.

$^{19}\text{F}$  NMR (377 MHz,  $\text{CDCl}_3$ )  $\delta$  -111.0.

HRMS (ESI-TOF)  $[\text{M} + \text{Na}]^+$  Calcd. for  $\text{C}_8\text{H}_6\text{BrFO}$ , 238.9483; Found 238.9507.

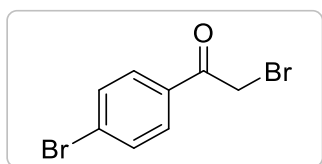

**2h**

### 2-bromo-1-(4-bromophenyl)ethan-1-one:

Following the general procedure, compound **2h** was obtained by column chromatography on silica gel (Eluent: petroleum ether/ethyl acetate = 60:1, v/v), 81.9 mg, 74% yield, slight yellow solid, melting point: 106.5 °C.

$^1\text{H}$  NMR (400 MHz,  $\text{CDCl}_3$ )  $\delta$  7.85 (d,  $J = 8.4$  Hz, 2H), 7.64 (d,  $J = 8.4$  Hz, 2H), 4.41 (s, 2H).

$^{13}\text{C}$  NMR (100 MHz,  $\text{CDCl}_3$ )  $\delta$  190.4, 132.6, 132.2, 130.4, 129.3, 30.3

HRMS (ESI-TOF)  $[\text{M} + \text{Na}]^+$  Calcd. for  $\text{C}_8\text{H}_6\text{Br}_2\text{O}$ , 298.8682; Found 298.8699.

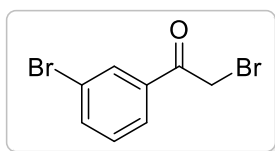

**2i**

### 2-bromo-1-(3-bromophenyl)ethan-1-one:

Following the general procedure, compound **2i** was obtained by column chromatography on silica gel (Eluent: petroleum ether/ethyl acetate = 60:1, v/v), 89.8 mg, 89% yield, yellow oil.

$^1\text{H}$  NMR (400 MHz,  $\text{CDCl}_3$ )  $\delta$  8.11 (t,  $J = 2.0$  Hz, 1H), 7.95 – 7.83 (m, 1H), 7.74 (m, 1H), 7.38 (t,  $J = 8.0$  Hz, 1H), 4.42 (s, 2H).

$^{13}\text{C}$  NMR (100 MHz,  $\text{CDCl}_3$ )  $\delta$  189.9, 136.8, 135.6, 131.9, 130.4, 127.4, 123.1, 30.4.

HRMS (ESI-TOF)  $[\text{M} + \text{Na}]^+$  Calcd. for  $\text{C}_8\text{H}_6\text{Br}_2\text{O}$ , 298.8682; Found 298.8672.

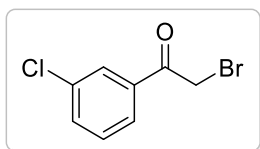

**2j**

**2-bromo-1-(3-chlorophenyl)ethan-1-one:**

Following the general procedure, compound **2j** was obtained by column chromatography on silica gel (Eluent: petroleum ether/ethyl acetate = 60:1, v/v), 43.3 mg, 46% yield, yellow oil.

$^1\text{H NMR}$  (500 MHz,  $\text{CDCl}_3$ )  $\delta$  7.96 (t,  $J = 2.0$  Hz, 1H), 7.86 (dt,  $J = 7.8, 1.4$  Hz, 1H), 7.58 (m, 1H), 7.45 (t,  $J = 7.8$  Hz, 1H), 4.42 (s, 2H).

$^{13}\text{C NMR}$  (100 MHz,  $\text{CDCl}_3$ )  $\delta$  190.1, 135.4, 135.2, 133.9, 130.2, 128.9, 127.0, 30.4.

**HRMS** (ESI-TOF)  $[\text{M} + \text{Na}]^+$  Calcd. for  $\text{C}_8\text{H}_6\text{BrClO}$ , 254.9188; Found 254.9163.

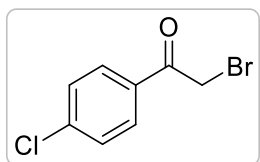

**2k**

**2-bromo-1-(4-chlorophenyl)ethan-1-one:**

Following the general procedure, compound **2k** was obtained by column chromatography on silica gel (Eluent: petroleum ether/ethyl acetate = 60:1, v/v), 74.5 mg, 86% yield, slight yellow solid, melting point: 96.2 °C.

$^1\text{H NMR}$  (400 MHz,  $\text{CDCl}_3$ )  $\delta$  7.93 (d,  $J = 8.4$  Hz, 2H), 7.47 (d,  $J = 8.4$  Hz, 2H), 4.42 (s, 2H).

$^{13}\text{C NMR}$  (100 MHz,  $\text{CDCl}_3$ )  $\delta$  190.2, 140.5, 132.2, 130.3, 129.2, 30.4.

**HRMS** (ESI-TOF)  $[\text{M} + \text{Na}]^+$  Calcd. for  $\text{C}_8\text{H}_6\text{BrClO}$ , 254.9188; Found 254.9187.

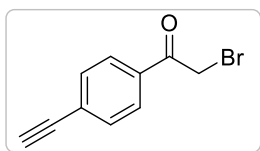

**2l**

**2-bromo-1-(4-ethynylphenyl)ethan-1-one:**

Following the general procedure, compound **2l** was obtained by column chromatography on silica gel (Eluent: petroleum ether/ethyl acetate = 60:1, v/v), 13.5 mg, 15% yield, slight yellow solid, melting point: 46.2 °C.

<sup>1</sup>H NMR (500 MHz, CDCl<sub>3</sub>) δ 7.94 (d, *J* = 8.4 Hz, 1H), 7.59 (d, *J* = 8.4 Hz, 1H), 4.43 (s, 1H), 3.29 (s, 1H).

<sup>13</sup>C NMR (100 MHz, CDCl<sub>3</sub>) δ 190.5, 133.6, 132.5, 128.8, 127.8, 82.5, 81.1, 30.5.

HRMS (ESI-TOF) [M + Na]<sup>+</sup> Calcd. for C<sub>10</sub>H<sub>7</sub>BrO, 244.9577; Found 244.9590.

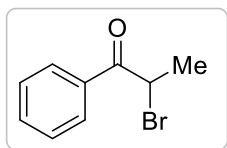

**2m**

### 2-bromo-1-phenylpropan-1-one:

Following the general procedure, compound **2m** was obtained by column chromatography on silica gel (Eluent: petroleum ether/ethyl acetate = 60:1, v/v), 53.8 mg, 63% yield, slight yellow oil.

<sup>1</sup>H NMR (400 MHz, CDCl<sub>3</sub>) δ 8.20 – 7.92 (m, 2H), 7.77 – 7.53 (m, 1H), 7.49 (dd, *J* = 8.2, 6.8 Hz, 2H), 5.30 (q, *J* = 6.6 Hz, 1H), 1.91 (d, *J* = 6.4 Hz, 2H).

<sup>13</sup>C NMR (100 MHz, CDCl<sub>3</sub>) δ 193.3, 133.9, 133.7, 128.9, 128.7, 41.4, 20.1.

HRMS (ESI-TOF) [M + Na]<sup>+</sup> Calcd. for C<sub>9</sub>H<sub>9</sub>BrO, 234.9734; Found 234.9750.

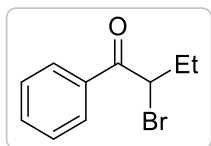

**2n**

### 2-bromo-1-phenylbutan-1-one:

Following the general procedure, compound **2n** was obtained by column chromatography on silica gel (Eluent: petroleum ether/ethyl acetate = 200:1, v/v), 53.2 mg, 59% yield, yellow oil.

<sup>1</sup>H NMR (400 MHz, CDCl<sub>3</sub>) δ 8.02 (d, *J* = 7.6 Hz, 2H), 7.60 (t, *J* = 7.2 Hz, 1H), 7.49 (t, *J* = 7.6 Hz, 2H), 5.08 (dd, *J* = 7.6, 6.4 Hz, 1H), 2.30 – 2.09 (m, 2H), 1.09 (t, *J* = 7.6 Hz, 3H).

<sup>13</sup>C NMR (100 MHz, CDCl<sub>3</sub>) δ 193.2, 134.5, 133.6, 128.8, 128.7, 49.0, 26.9, 12.1.

**HRMS** (ESI-TOF)  $[M + Na]^+$  Calcd. for  $C_{10}H_{11}BrO$ , 248.9890; Found 248.9871.

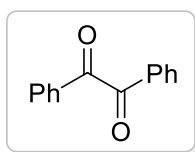

**2o**

**Benzil:**

Following the general procedure, compound **2o** was obtained by column chromatography on silica gel (Eluent: petroleum ether/ethyl acetate = 60:1, v/v), 71.3 mg, 65% yield, slight yellow solid, melting point: 85.7 °C.

**<sup>1</sup>H NMR** (400 MHz,  $CDCl_3$ )  $\delta$  7.98 (d,  $J = 8.0$  Hz, 4H), 7.68 – 7.64 (m, 2H), 7.51 (t,  $J = 7.8$  Hz, 4H).

**<sup>13</sup>C NMR** (100 MHz,  $CDCl_3$ )  $\delta$  194.6, 134.9, 132.9, 129.9, 129.0.

**HRMS** (ESI-TOF)  $[M + Na]^+$  Calcd. for  $C_{14}H_{10}O_2$ , 233.0578; Found 233.0568.

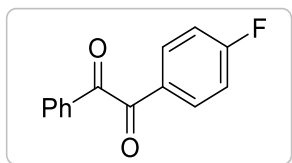

**2p**

**1-(4-fluorophenyl)-2-phenylethane-1,2-dione:**

Following the general procedure, compound **2p** was obtained by column chromatography on silica gel (Eluent: petroleum ether/ethyl acetate = 20:1, v/v), 45.7 mg, 50% yield, yellow solid, melting point: 60.2 °C.

**<sup>1</sup>H NMR** (400 MHz,  $CDCl_3$ )  $\delta$  8.02 (dd,  $J = 8.4, 5.2$  Hz, 2H), 7.98 (d,  $J = 7.6$  Hz, 2H), 7.68 (t,  $J = 7.2$  Hz, 1H), 7.53 (t,  $J = 7.6$  Hz, 2H), 7.19 (t,  $J = 8.4$  Hz, 2H).

**<sup>13</sup>C NMR** (100 MHz,  $CDCl_3$ )  $\delta$  194.1, 192.7, 135.0, 132.9, 132.8, 132.7, 129.9, 129.1, 116.5, 116.3.

**<sup>19</sup>F NMR** (377 MHz,  $CDCl_3$ )  $\delta$  -101.2.

**HRMS** (ESI-TOF)  $[M + Na]^+$  Calcd. for  $C_{14}H_9FO_2$ , 251.0484; Found 251.0495.

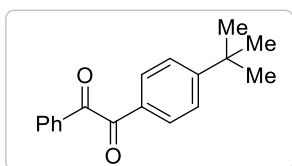

## 2q

### 1-(4-(tert-butyl)phenyl)-2-phenylethane-1,2-dione:

Following the general procedure, compound **2q** was obtained by column chromatography on silica gel (Eluent: petroleum ether/ethyl acetate = 100:1, v/v), 48.0 mg, 45% yield, yellow oil.

$^1\text{H NMR}$  (400 MHz,  $\text{CDCl}_3$ )  $\delta$  7.98 (d,  $J = 8.0$  Hz, 2H), 7.91 (d,  $J = 8.0$  Hz, 2H), 7.65 (t,  $J = 7.2$  Hz, 1H), 7.54 – 7.49 (m, 4H), 1.34 (s, 9H).

$^{13}\text{C NMR}$  (100 MHz,  $\text{CDCl}_3$ )  $\delta$  194.8, 194.3, 159.0, 134.8, 133.1, 130.4, 129.9, 128.9, 126.0, 35.4, 30.9.

**HRMS** (ESI-TOF)  $[\text{M} + \text{Na}]^+$  Calcd. for  $\text{C}_{18}\text{H}_{18}\text{O}_2$ , 289.1204; Found 289.1196.

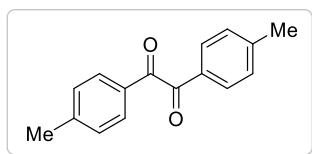

**2r**

### 1,2-di-p-tolyloethane-1,2-dione:

Following the general procedure, compound **2r** was obtained by column chromatography on silica gel (Eluent: petroleum ether/ethyl acetate = 100:1, v/v), 58.8 mg, 62% yield, yellow solid, melting point: 105.7 °C.

$^1\text{H NMR}$  (500 MHz,  $\text{CDCl}_3$ )  $\delta$  7.86 (d,  $J = 8.4$  Hz, 4H), 7.30 (d,  $J = 8.0$  Hz, 4H), 2.43 (s, 6H).

$^{13}\text{C NMR}$  (100 MHz,  $\text{CDCl}_3$ )  $\delta$  194.1, 146.1, 130.7, 130.0, 129.7, 21.9

**HRMS** (ESI-TOF)  $[\text{M} + \text{Na}]^+$  Calcd. for  $\text{C}_{16}\text{H}_{14}\text{O}_2$ , 261.0891; Found 261.0891.

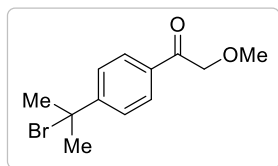

**2s**

### 1-(4-(2-bromopropan-2-yl)phenyl)-2-methoxyethan-1-one:

Following the general procedure, compound **2s** was obtained by column chromatography on silica gel (Eluent: petroleum ether/ethyl acetate = 20:1, v/v), 91.1 mg, 84% yield, yellow oil.

$^1\text{H NMR}$  (400 MHz,  $\text{CDCl}_3$ )  $\delta$  7.97 (d,  $J = 8.0$  Hz, 2H), 7.54 (d,  $J = 8.4$  Hz, 2H), 4.45 (s, 2H), 3.11 (s, 3H), 1.55 (s, 6H).

$^{13}\text{C NMR}$  (100 MHz,  $\text{CDCl}_3$ )  $\delta$  190.9, 152.9, 132.6, 129.0, 126.3, 50.8, 30.8, 27.7.

**HRMS** (ESI-TOF)  $[\text{M} + \text{Na}]^+$  Calcd. for  $\text{C}_{12}\text{H}_{15}\text{BrO}_2$ , 293.0152; Found 293.0142.

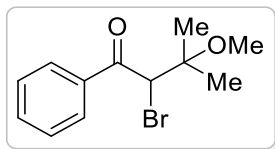

**2t**

### **2-bromo-3-methoxy-3-methyl-1-phenylbutan-1-one:**

Following the general procedure, compound **2t** was obtained by column chromatography on silica gel (Eluent: petroleum ether/ethyl acetate = 60:1, v/v), 16.9 mg, 16% yield, slight yellow oil.

$^1\text{H NMR}$  (400 MHz,  $\text{DMSO}-d_6$ )  $\delta$  8.56 (d,  $J = 7.6$  Hz, 1H), 8.22 (t,  $J = 7.4$  Hz, 1H), 8.09 (t,  $J = 7.6$  Hz, 2H), 6.06 (s, 1H), 3.75 (s, 3H), 2.03 (s, 3H), 1.94 (s, 3H).

$^{13}\text{C NMR}$  (100 MHz,  $\text{CDCl}_3$ )  $\delta$  195.3, 137.2, 134.7, 129.8, 129.6, 77.8, 53.8, 50.2, 23.7, 21.3.

**HRMS** (ESI-TOF)  $[\text{M} + \text{Na}]^+$  Calcd. for  $\text{C}_{12}\text{H}_{15}\text{BrO}_2$ , 293.0152; Found 293.0156.

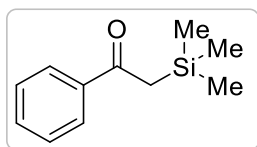

**2u**

### **1-phenyl-2-(trimethylsilyl)ethan-1-one:**

Following the general procedure, compound **2u** was obtained by column chromatography on silica gel (Eluent: petroleum ether/ethyl acetate = 60:1, v/v), 74.4 mg, 97% yield, yellow oil.

$^1\text{H NMR}$  (400 MHz,  $\text{CDCl}_3$ )  $\delta$  8.18 – 7.92 (m, 2H), 7.67 – 7.55 (m, 1H), 7.50 (t,  $J = 7.6$  Hz, 2H), 4.46 (s, 2H), 0.07 (s, 9H).

$^{13}\text{C NMR}$  (100 MHz,  $\text{CDCl}_3$ )  $\delta$  191.3, 133.9, 133.9, 128.9, 128.9, 30.9, 1.0.

**HRMS** (ESI-TOF)  $[\text{M} + \text{Na}]^+$  Calcd. for  $\text{C}_{11}\text{H}_{16}\text{OSi}$ , 215.0867; Found 215.0883.

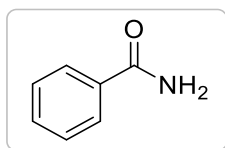

3

**Benzamide:**

Following the general procedure, compound **3** was obtained by column chromatography on silica gel (Eluent: petroleum ether/ethyl acetate = 3:1, v/v), 58.9 mg, 84% yield, white solid, melting point: 128.6 °C.

$^1\text{H NMR}$  (400 MHz,  $\text{CDCl}_3$ )  $\delta$  7.82 – 7.79 (m, 2H), 7.54 (t,  $J = 7.6$  Hz, 1H), 7.45 (t,  $J = 7.6$  Hz, 2H), 6.27 (d,  $J = 44.4$  Hz, 2H).

$^{13}\text{C NMR}$  (100 MHz,  $\text{CDCl}_3$ )  $\delta$  169.8, 133.1, 132.1, 128.6, 127.3.

**HRMS** (ESI-TOF)  $[\text{M} + \text{Na}]^+$  Calcd. for  $\text{C}_7\text{H}_7\text{NO}$ , 144.0425; Found 144.0402.

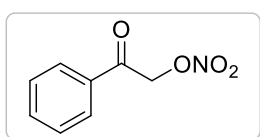

4

**2-oxo-2-phenylethyl nitrate:**

Following the general procedure, compound **4** was obtained by column chromatography on silica gel (Eluent: petroleum ether/ethyl acetate = 8:1, v/v), 347.6 mg, 96% yield, yellow oil.

$^1\text{H NMR}$  (400 MHz,  $\text{CDCl}_3$ )  $\delta$  7.92 (d,  $J = 6.8$  Hz, 2H), 7.66 (t,  $J = 7.4$  Hz, 1H), 7.53 (t,  $J = 7.8$  Hz, 2H), 5.63 (s, 2H).

$^{13}\text{C NMR}$  (100 MHz,  $\text{CDCl}_3$ )  $\delta$  189.9, 134.6, 133.3, 129.1, 127.8, 72.1.

**HRMS** (ESI-TOF)  $[\text{M} + \text{Na}]^+$  Calcd. for  $\text{C}_8\text{H}_7\text{NO}_4$ , 204.0272; Found 204.0270.

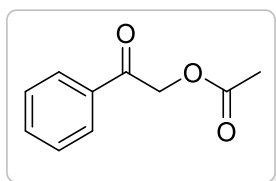

5

**2-oxo-2-phenylethyl acetate:**

Following the general procedure, compound **5** was obtained by column chromatography on silica gel (Eluent: petroleum ether/ethyl acetate = 8:1, v/v), 347.6 mg, 37% yield, yellow oil.

$^1\text{H NMR}$  (400 MHz,  $\text{CDCl}_3$ )  $\delta$  7.94 – 7.90 (m, 2H), 7.62 (t,  $J = 7.2$  Hz, 1H), 7.50 (t,  $J = 8.0$  Hz, 2H), 5.35 (s, 2H), 2.24 (s, 3H).

$^{13}\text{C}$  NMR (100 MHz,  $\text{CDCl}_3$ )  $\delta$  192.1, 170.4, 134.2, 133.9, 128.9, 127.8, 66.0, 20.6.

HRMS (ESI-TOF)  $[\text{M} + \text{Na}]^+$  Calcd. for  $\text{C}_{10}\text{H}_{10}\text{O}_3$ , 201.0527; Found 201.0628.

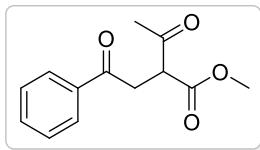

**6a**

**methyl 2-acetyl-4-oxo-4-phenylbutanoate:**

Following the general procedure, compound **6a** was obtained by column chromatography on silica gel (Eluent: petroleum ether/ethyl acetate = 10:1, v/v), 347.6 mg, 37% yield, yellow oil.

$^1\text{H}$  NMR (400 MHz,  $\text{CDCl}_3$ )  $\delta$  7.98 (d,  $J = 7.2$  Hz, 2H), 7.58 (t,  $J = 7.2$  Hz, 1H), 7.47 (t,  $J = 7.6$  Hz, 2H), 4.24 (dd,  $J = 8.2, 5.6$  Hz, 1H), 3.78 (s, 3H), 3.75 – 3.50 (m, 2H), 2.45 (s, 3H).

$^{13}\text{C}$  NMR (101 MHz,  $\text{CDCl}_3$ )  $\delta$  202.3, 197.0, 169.4, 135.9, 133.5, 128.6, 128.1, 53.5, 52.7, 37.4, 30.3.

HRMS (ESI-TOF)  $[\text{M} + \text{Na}]^+$  Calcd. for  $\text{C}_{13}\text{H}_{14}\text{O}_4$ , 257.0789; Found 257.0797.

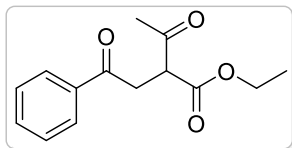

**6b**

**ethyl 2-acetyl-4-oxo-4-phenylbutanoate:**

Following the general procedure, compound **6b** was obtained by column chromatography on silica gel (Eluent: petroleum ether/ethyl acetate = 10:1, v/v), 347.6 mg, 39% yield, yellow oil.

$^1\text{H}$  NMR (400 MHz,  $\text{CDCl}_3$ )  $\delta$  8.00 – 7.97 (m, 2H), 7.58 (t,  $J = 7.2$  Hz, 1H), 7.47 (t,  $J = 7.8$  Hz, 2H), 4.26 – 4.20 (m, 3H), 3.76 – 3.49 (m, 2H), 2.45 (s, 3H), 1.29 (t,  $J = 7.2$  Hz, 3H).

$^{13}\text{C}$  NMR (100 MHz,  $\text{CDCl}_3$ )  $\delta$  202.4, 197.1, 168.8, 135.9, 133.5, 128.6, 128.1, 61.7, 53.8, 37.3, 30.3, 13.9.

HRMS (ESI-TOF)  $[\text{M} + \text{Na}]^+$  Calcd. for  $\text{C}_{14}\text{H}_{16}\text{O}_4$ , 271.0946; Found 270.2700.

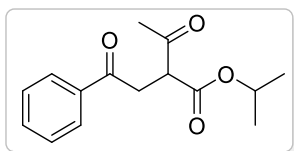

**6c**

**isopropyl 2-acetyl-4-oxo-4-phenylbutanoate:**

Following the general procedure, compound **6c** was obtained by column chromatography on silica gel (Eluent: petroleum ether/ethyl acetate = 10:1, v/v), 347.6 mg, 40% yield, yellow oil.

$^1\text{H NMR}$  (400 MHz,  $\text{CDCl}_3$ )  $\delta$  7.98 (d,  $J = 7.2$  Hz, 2H), 7.58 (t,  $J = 7.2$  Hz, 1H), 7.47 (t,  $J = 8.0$  Hz, 2H), 5.08 (dt,  $J = 12.8, 6.4$  Hz, 1H), 4.20 (dd,  $J = 8.4, 5.6$  Hz, 1H), 3.75 – 3.48 (m, 2H), 2.44 (s, 3H), 1.29 (d,  $J = 6.4$  Hz, 3H), 1.26 (d,  $J = 6.4$  Hz, 3H).

$^{13}\text{C NMR}$  (100 MHz,  $\text{CDCl}_3$ )  $\delta$  202.4, 197.2, 168.3, 136.0, 133.4, 128.6, 128.1, 69.4, 54.1, 37.3, 30.2, 21.6, 21.5.

**HRMS** (ESI-TOF)  $[\text{M} + \text{Na}]^+$  Calcd. for  $\text{C}_{15}\text{H}_{18}\text{O}_4$ , 285.1102; Found 285.1083.

## 8. $^1\text{H}$ NMR, $^{13}\text{C}$ NMR and $^{19}\text{F}$ NMR Spectra

$^1\text{H}$  NMR (500 MHz,  $\text{CDCl}_3$ )

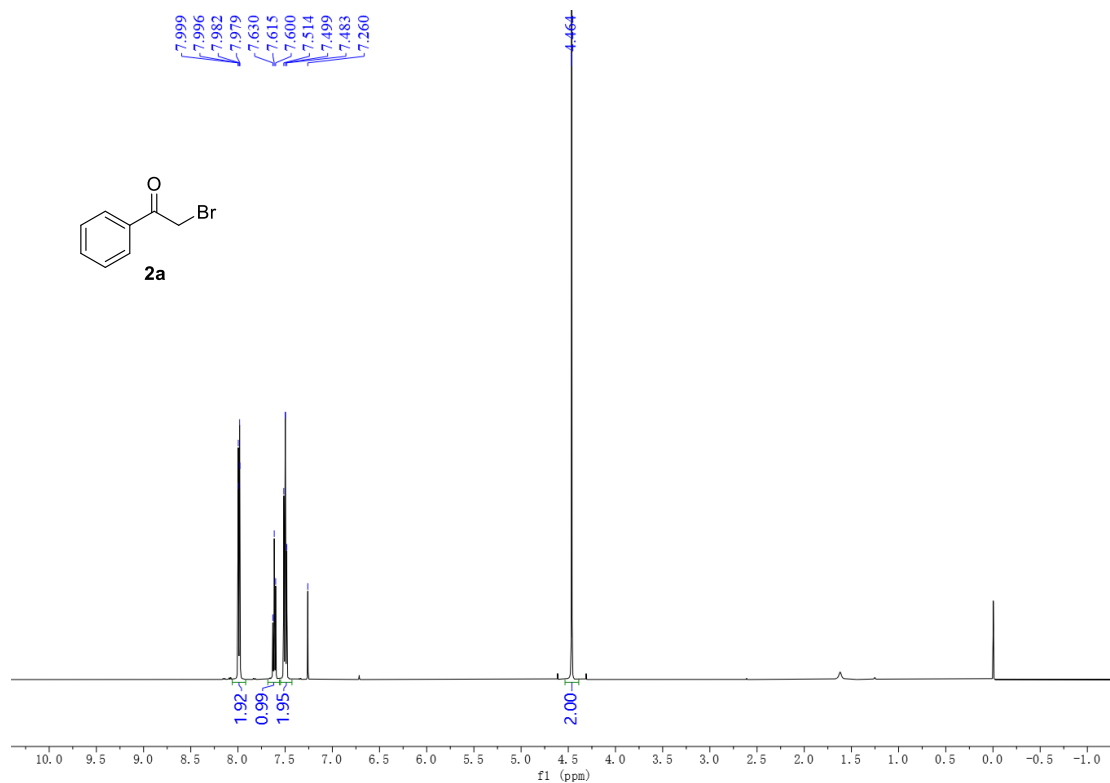

$^{13}\text{C}$  NMR (100 MHz,  $\text{CDCl}_3$ )

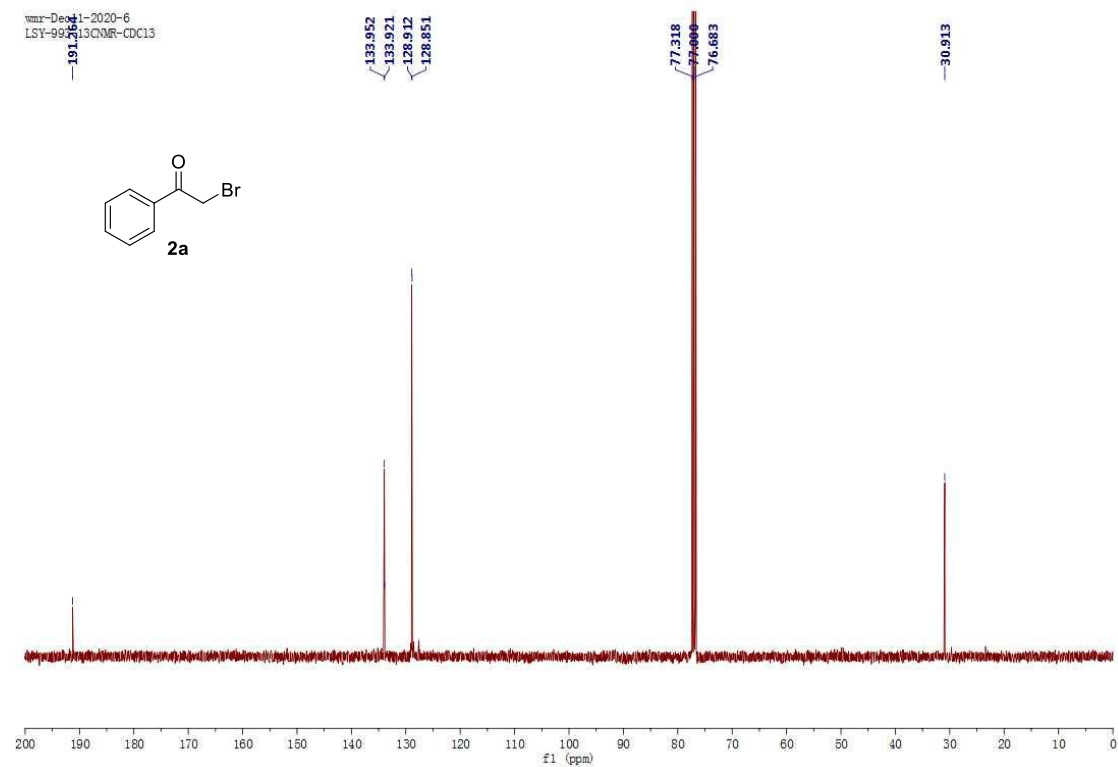

$^1\text{H}$  NMR (400 MHz,  $\text{CDCl}_3$ )

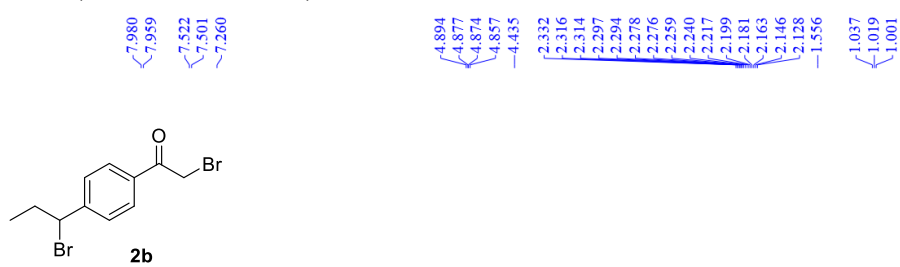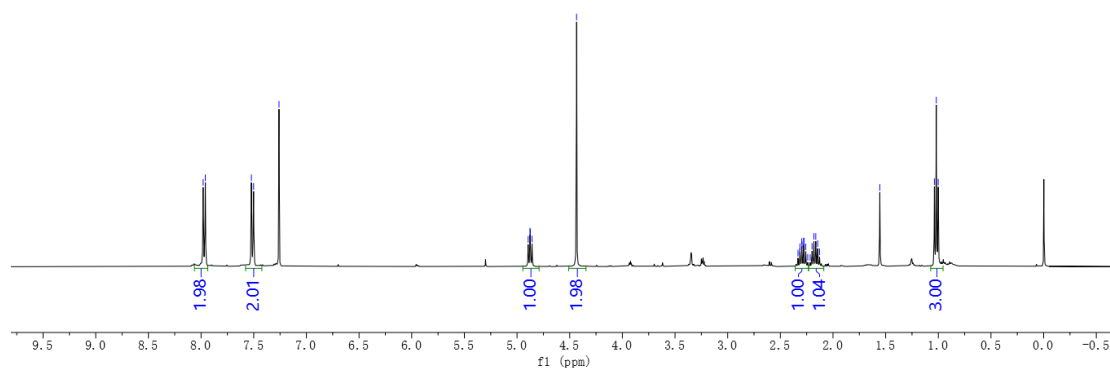

$^{13}\text{C}$  NMR (100 MHz,  $\text{CDCl}_3$ )

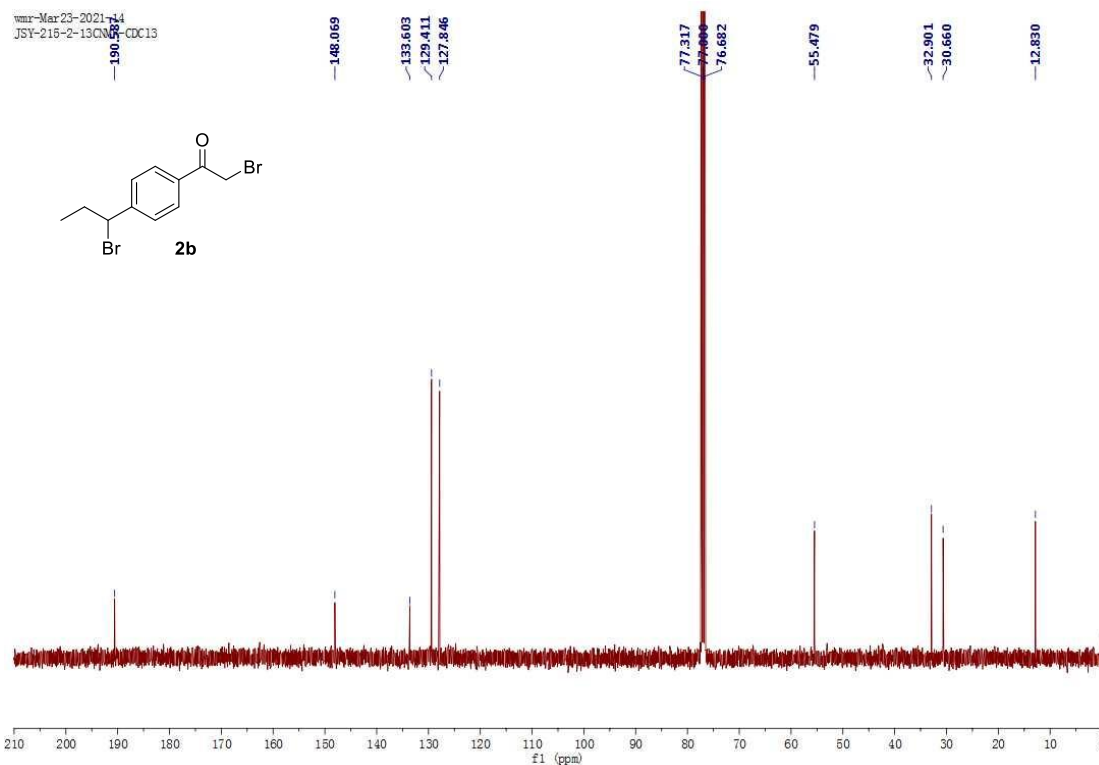

$^1\text{H}$  NMR (500 MHz,  $\text{CDCl}_3$ )

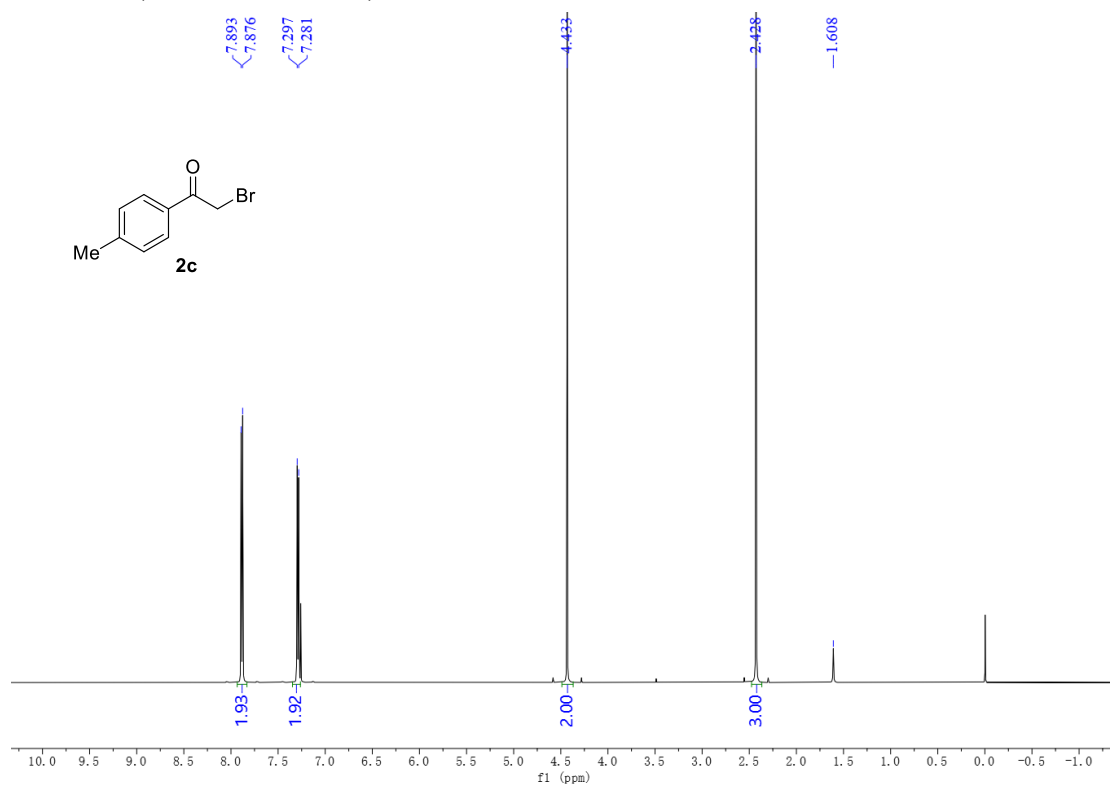

$^{13}\text{C}$  NMR (100 MHz,  $\text{CDCl}_3$ )

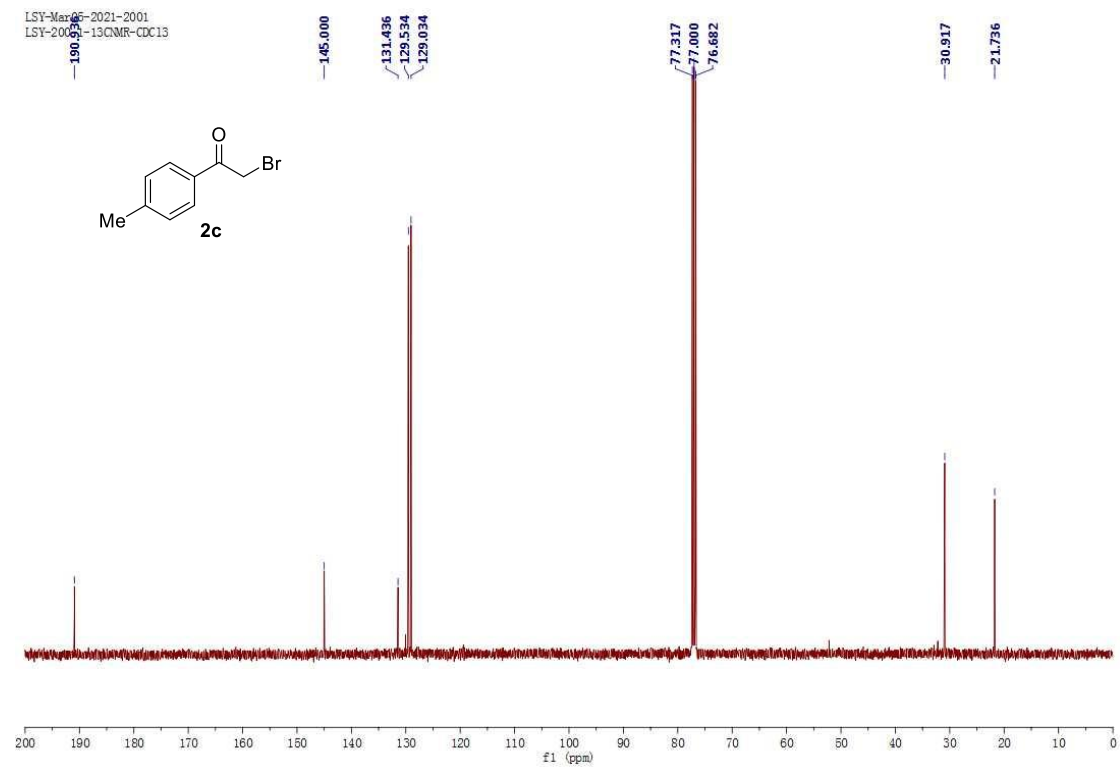

# <sup>1</sup>H NMR (400 MHz, CDCl<sub>3</sub>)

nmr-Apr21-2021-7  
LST-0421-199-1HNMR-CDCl3

7.685  
7.664  
7.450  
7.431  
7.413  
7.304  
7.288  
7.272  
7.262

4.431

2.528

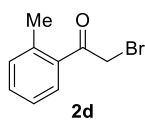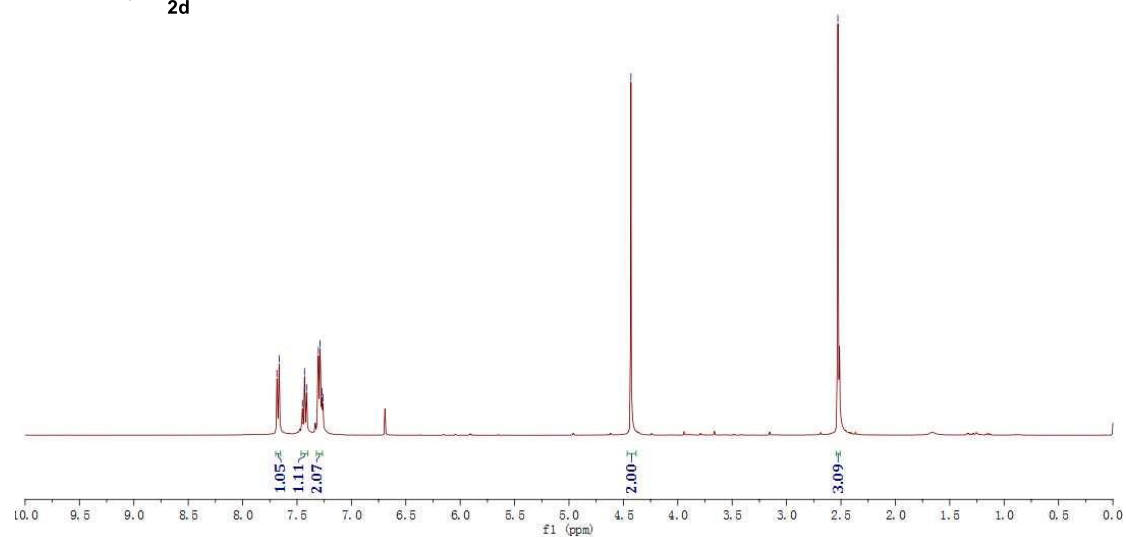

# <sup>13</sup>C NMR (100 MHz, CDCl<sub>3</sub>)

nmr-Apr117-2021-6  
LST-0421-199-13CNMR-CDCl3

194.411

139.702  
134.438  
132.327  
132.307  
128.978  
125.778

77.318  
77.000  
76.682

33.660

21.391

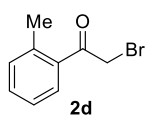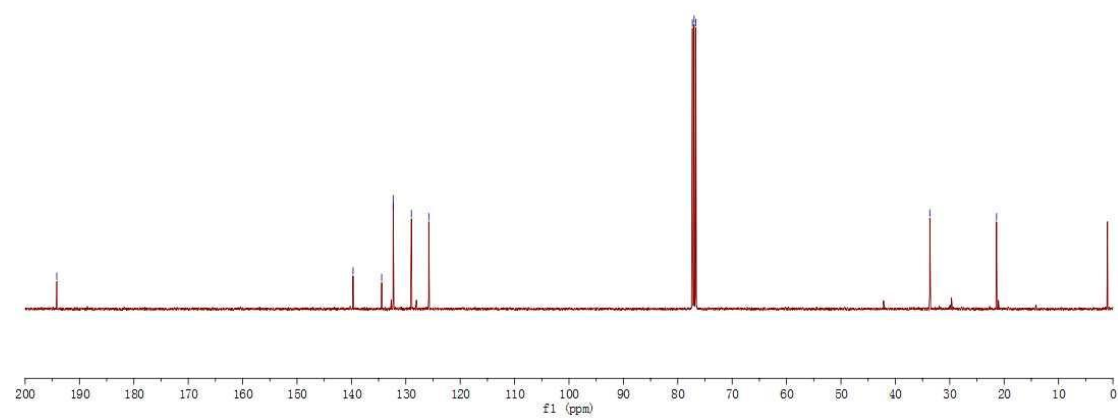

<sup>1</sup>H NMR (500 MHz, CDCl<sub>3</sub>)

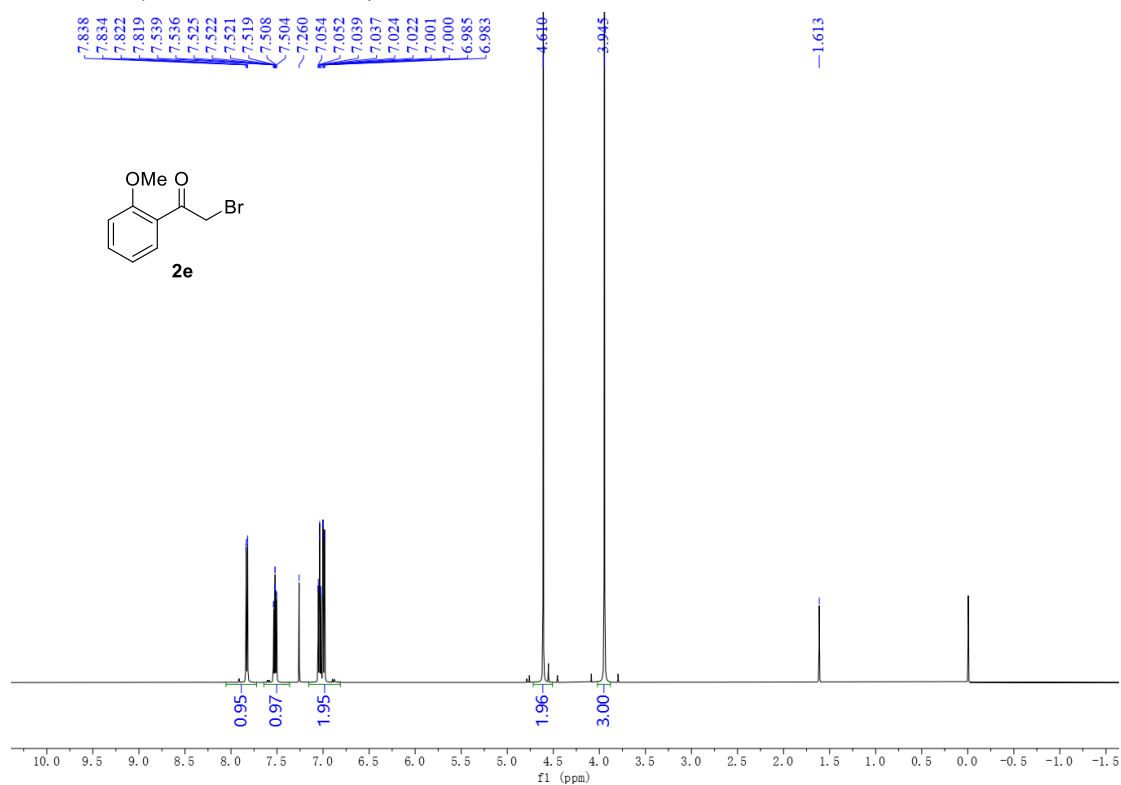

<sup>13</sup>C NMR (100 MHz, CDCl<sub>3</sub>)

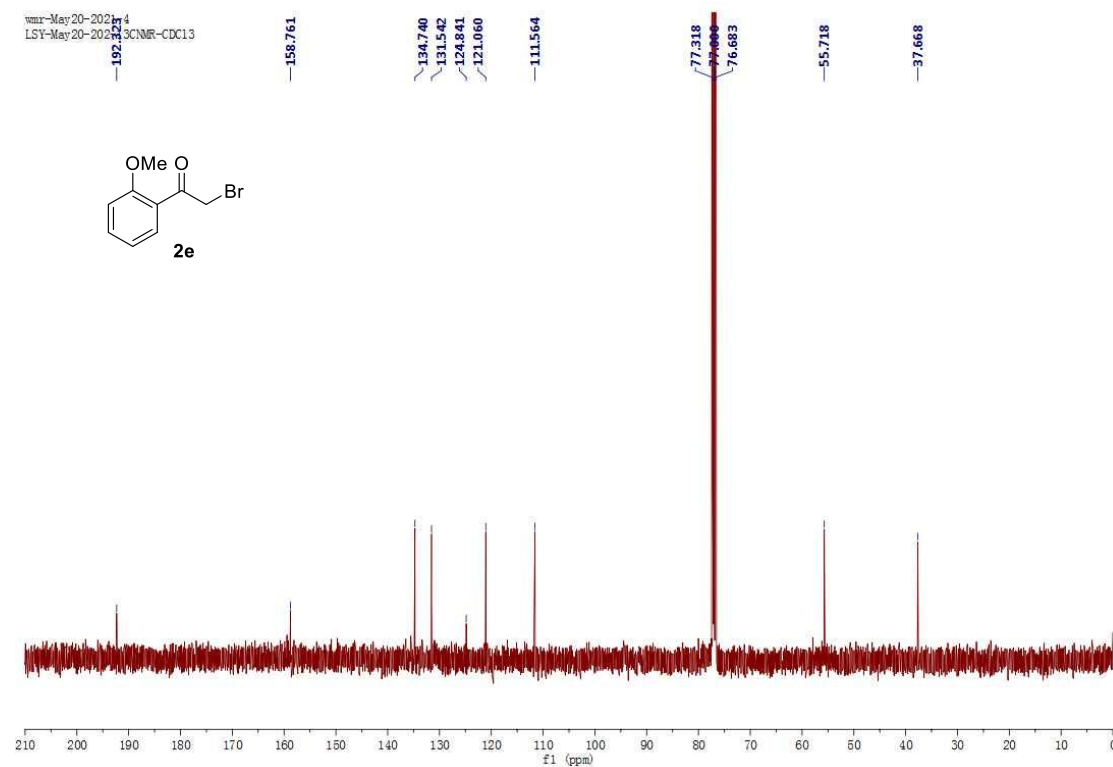

# <sup>1</sup>H NMR (400 MHz, CDCl<sub>3</sub>)

nmr-Mar08-2021-9  
LST-201-1-1HNMR-CDCl3

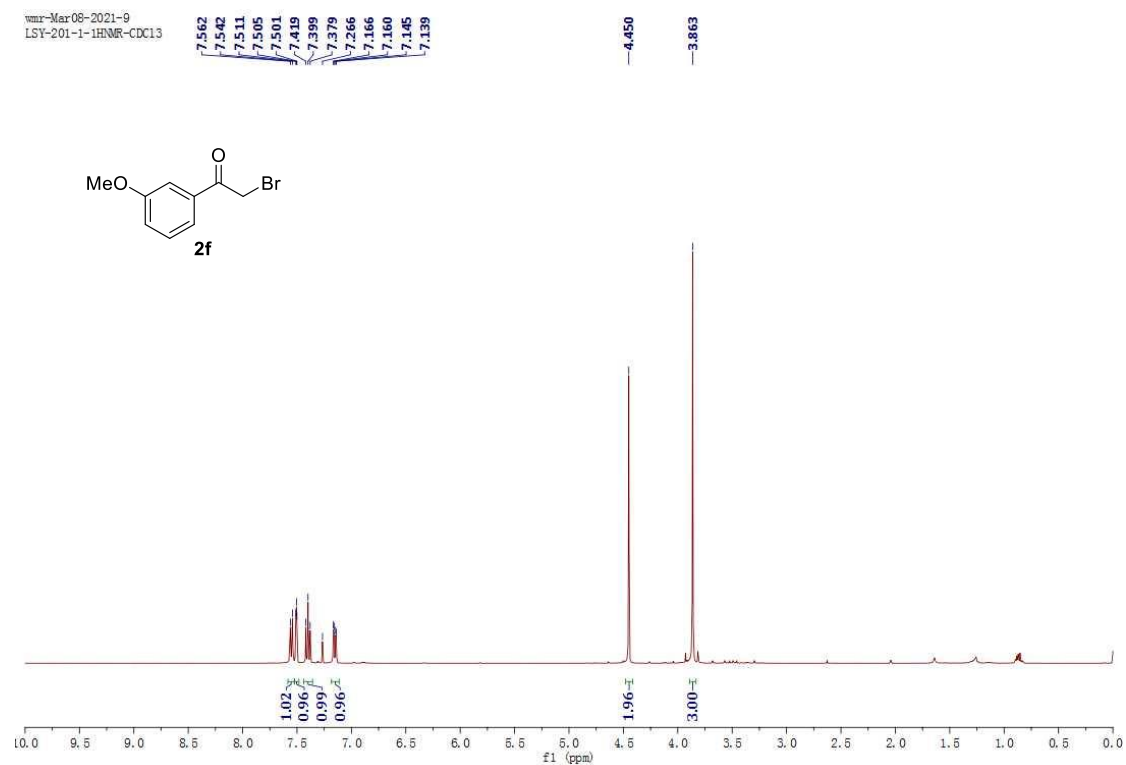

# <sup>13</sup>C NMR (100 MHz, CDCl<sub>3</sub>)

nmr-Mar08-2021-9  
LST-201-1-13CNMR-CDCl3

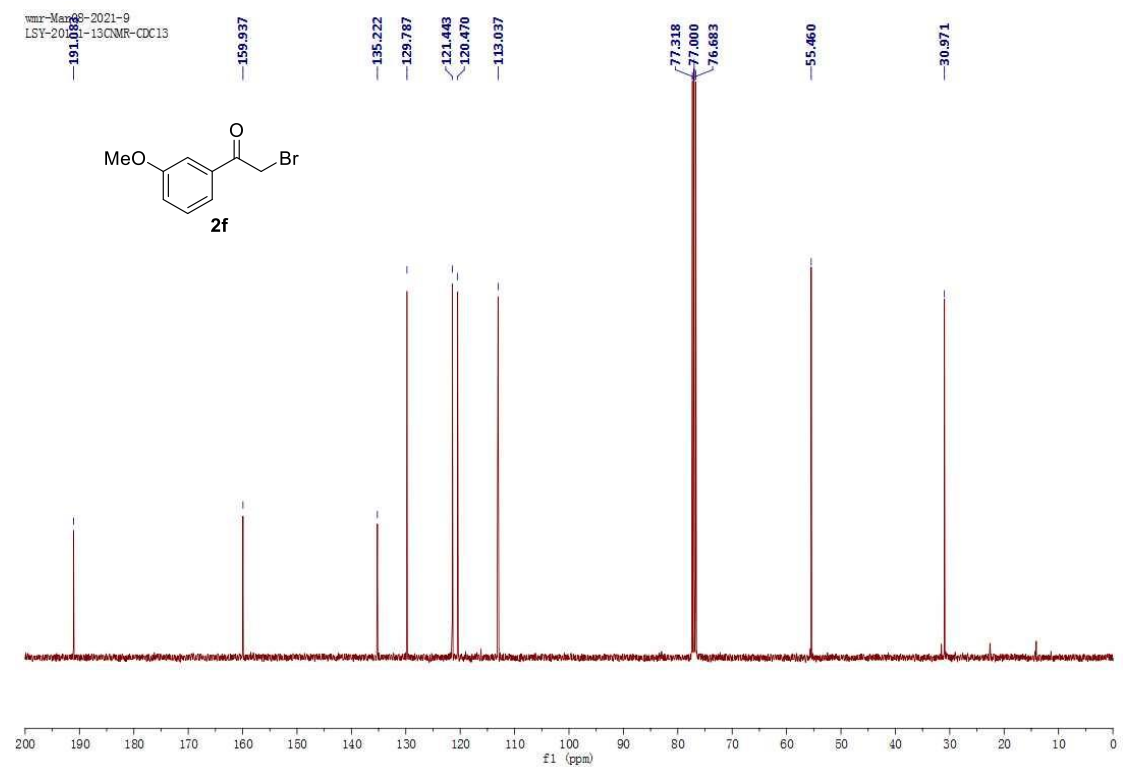

<sup>1</sup>H NMR (500 MHz, CDCl<sub>3</sub>)

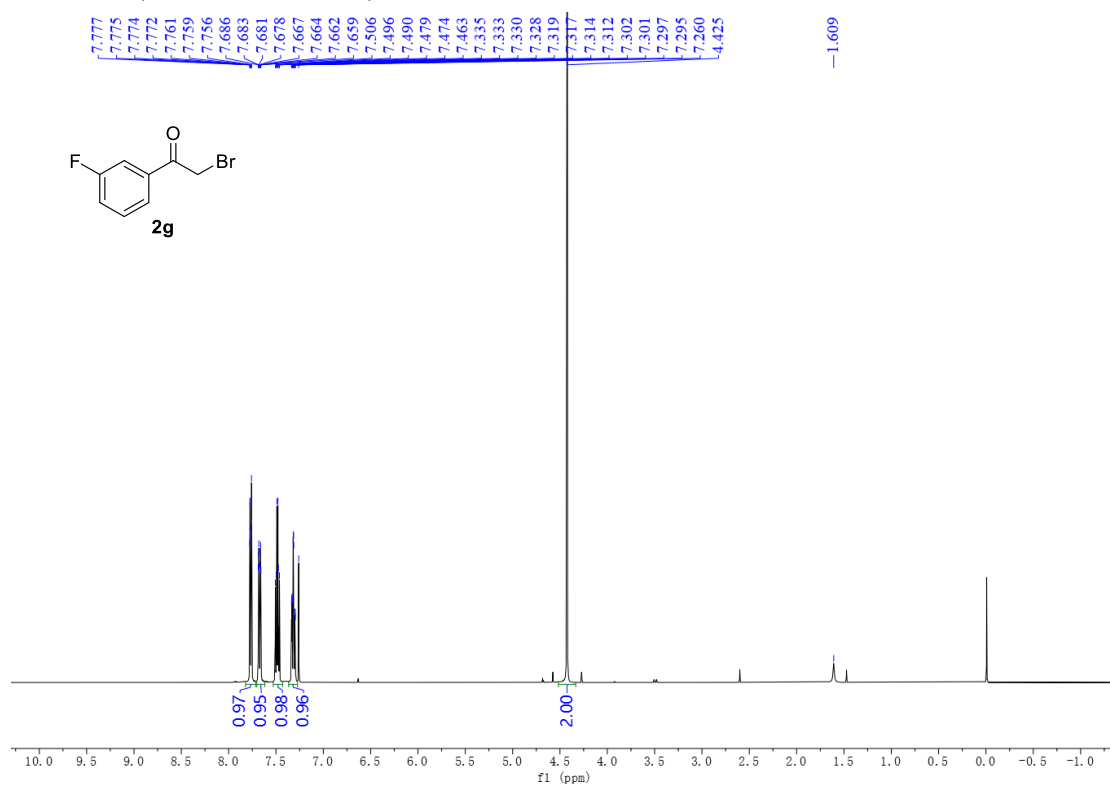

<sup>13</sup>C NMR (100 MHz, CDCl<sub>3</sub>)

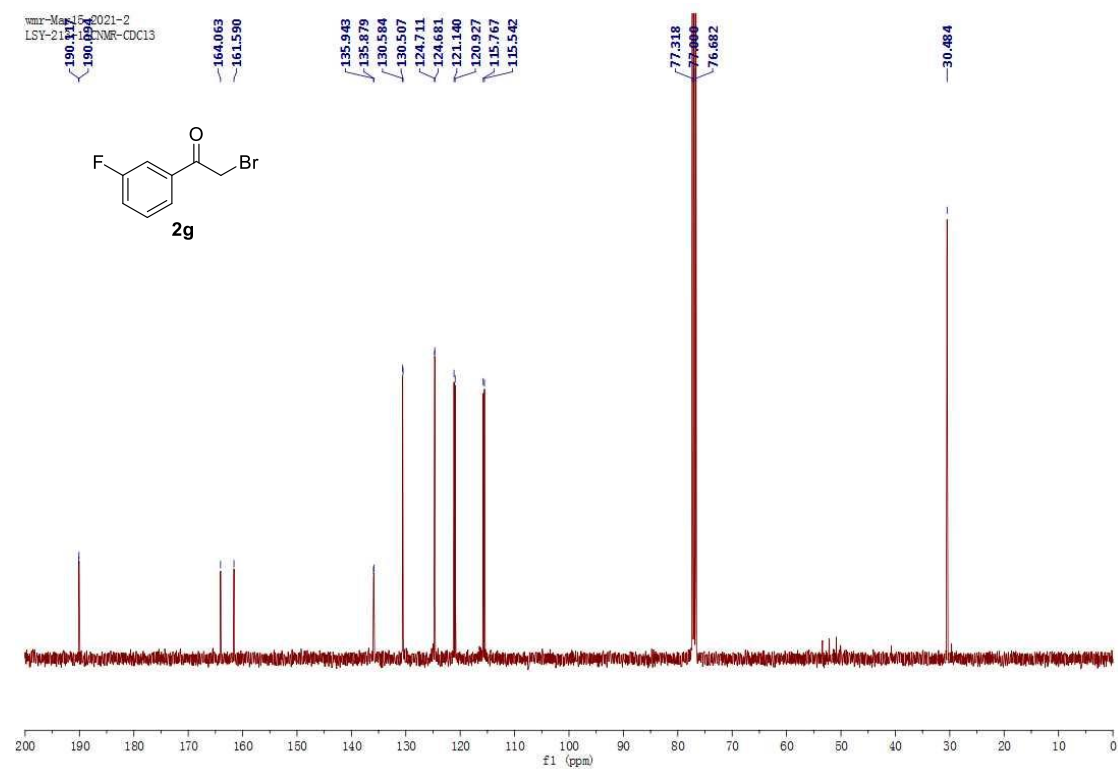

# $^{19}\text{F}$ NMR (377 MHz, $\text{CDCl}_3$ )

LSY-0327-1- $^{19}\text{F}$ NMR  
LSY-0327-1- $^{19}\text{F}$ NMR- $\text{CDCl}_3$

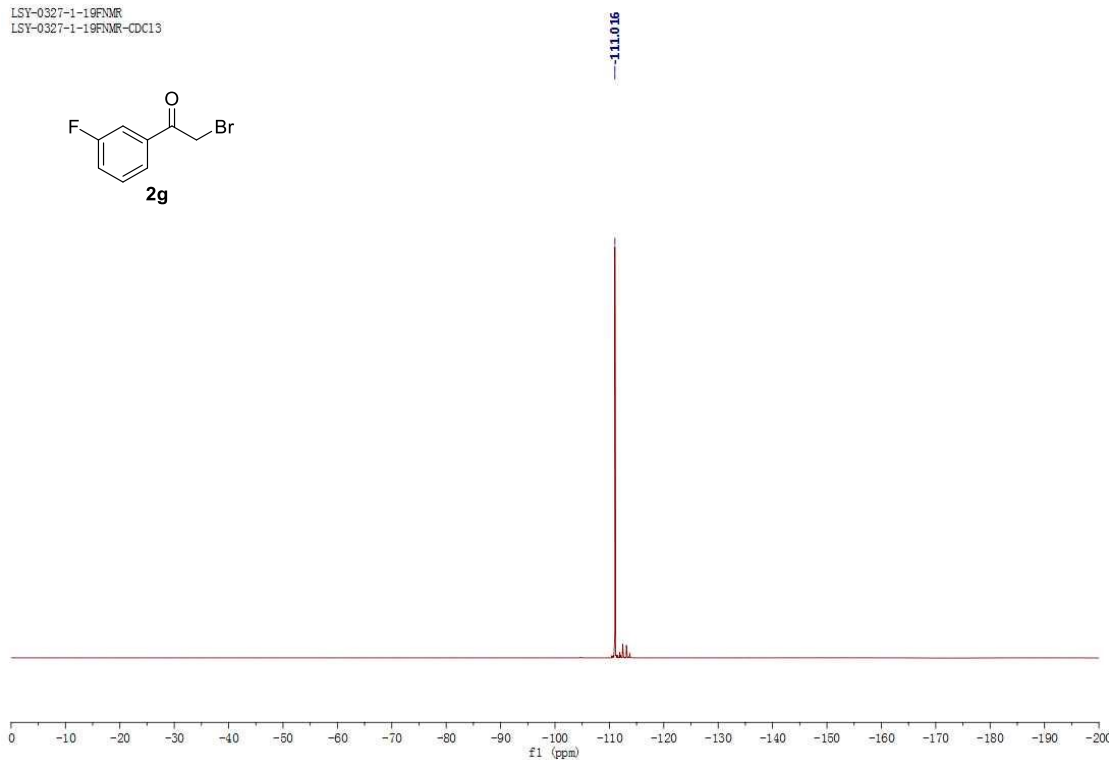

# $^1\text{H}$ NMR (400 MHz, $\text{CDCl}_3$ )

wmr-Mar08-2021-8  
LSY-204- $^1\text{H}$ NMR- $\text{CDCl}_3$

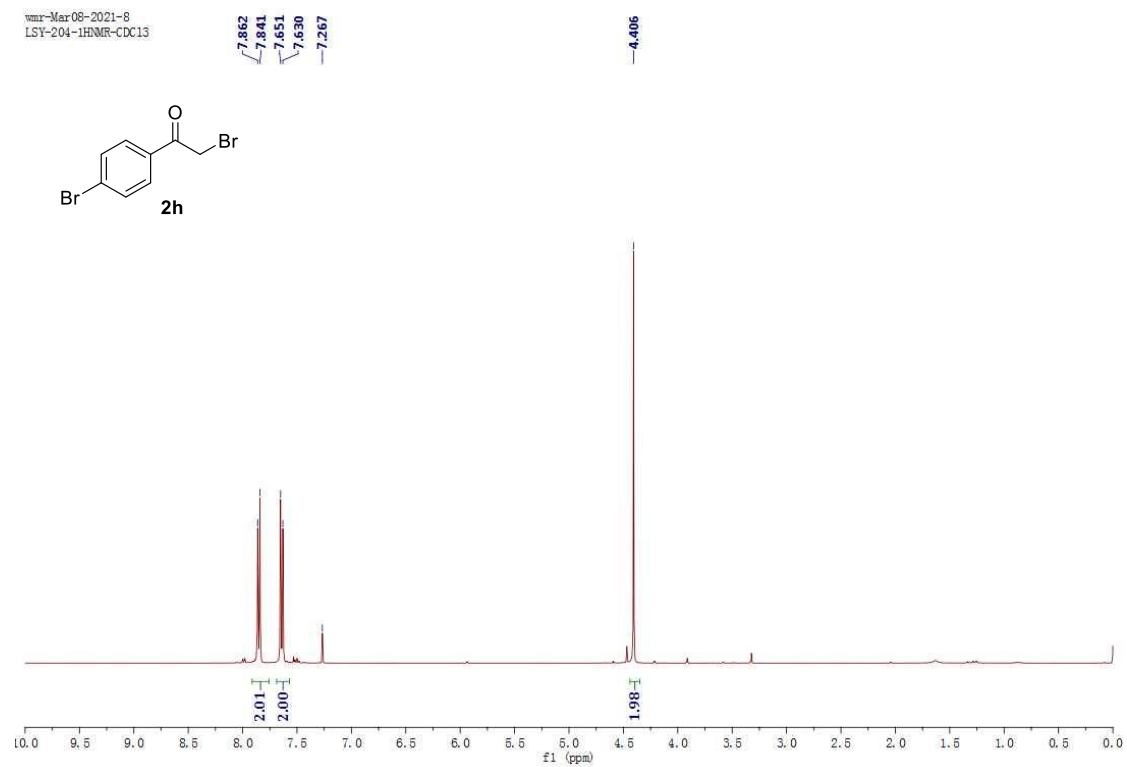

<sup>13</sup>C NMR (100 MHz, CDCl<sub>3</sub>)

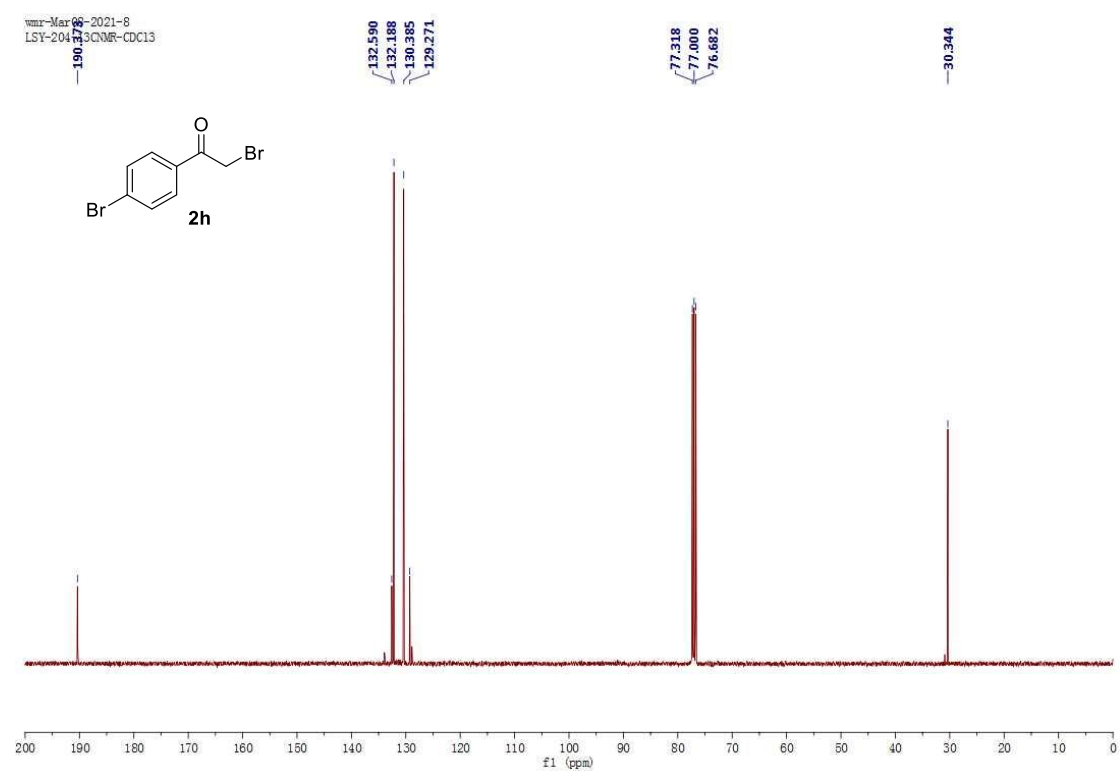

<sup>1</sup>H NMR (400 MHz, CDCl<sub>3</sub>)

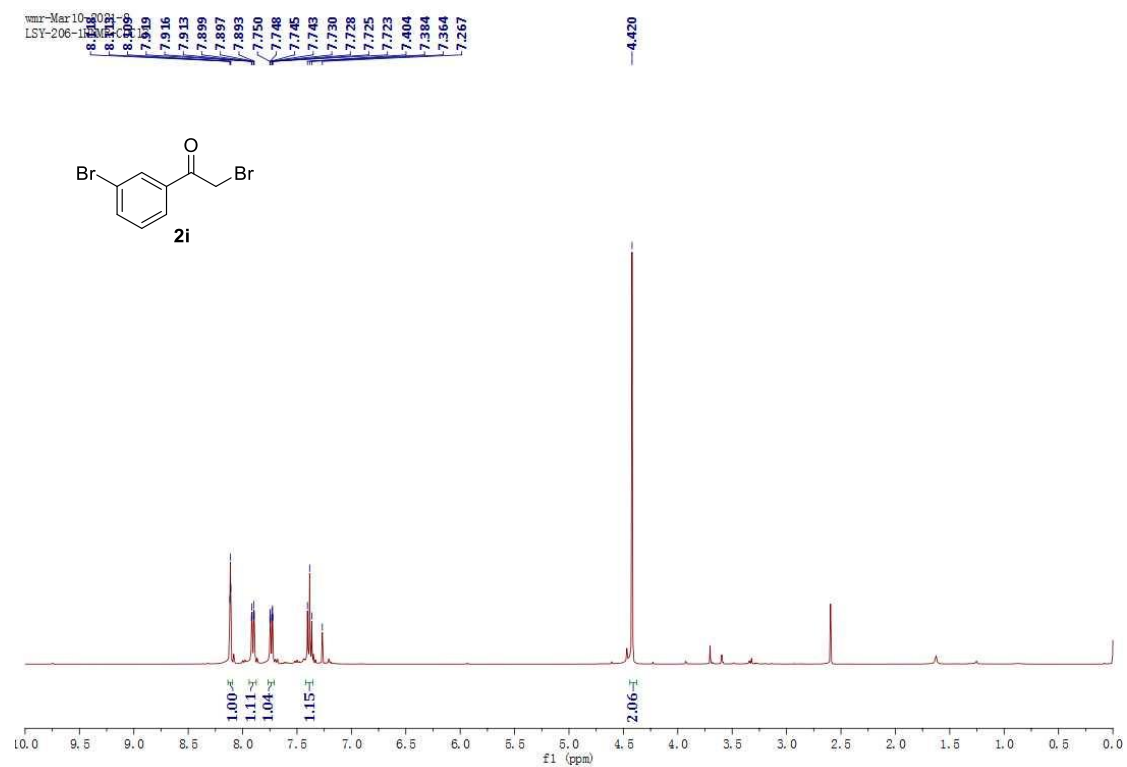

$^{13}\text{C}$  NMR (100 MHz,  $\text{CDCl}_3$ )

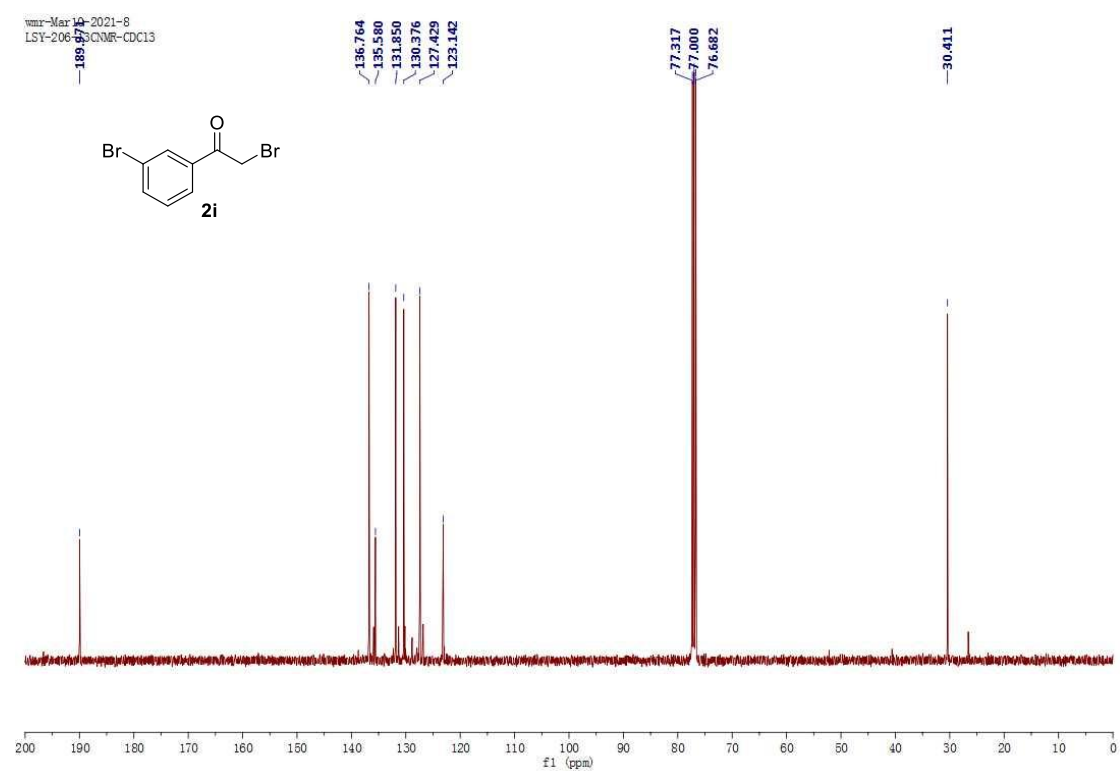

$^1\text{H}$  NMR (500 MHz,  $\text{CDCl}_3$ )

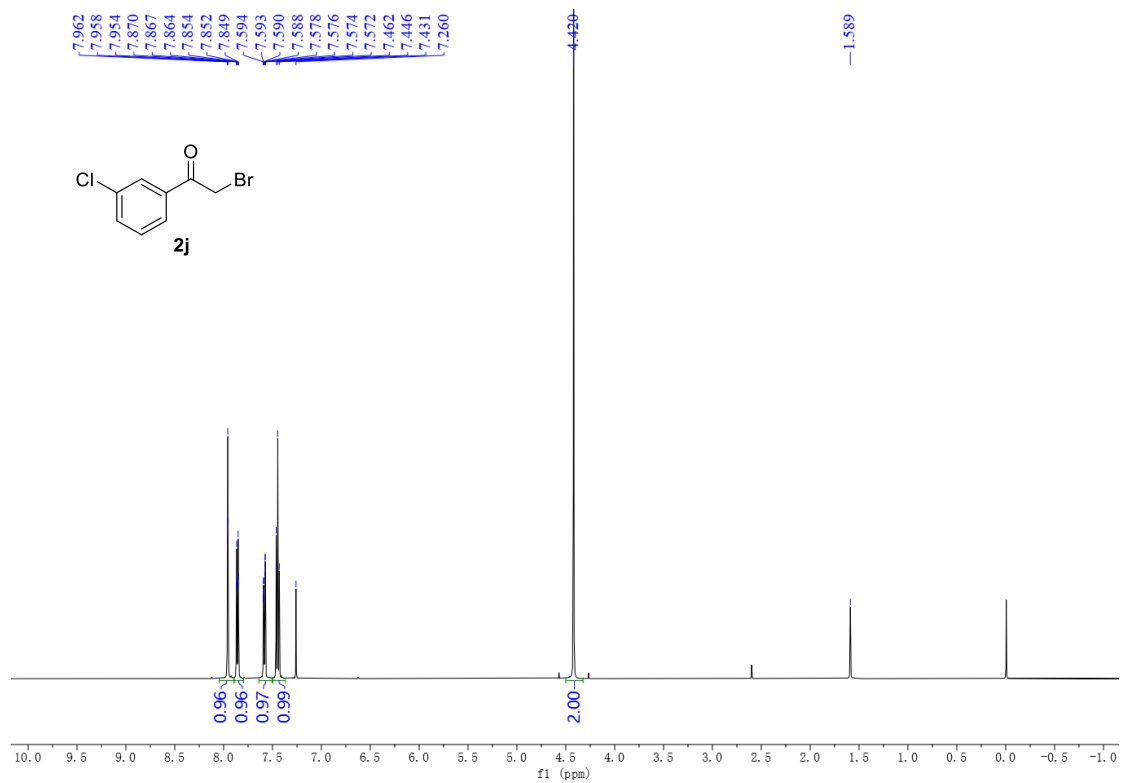

<sup>13</sup>C NMR (100 MHz, CDCl<sub>3</sub>)

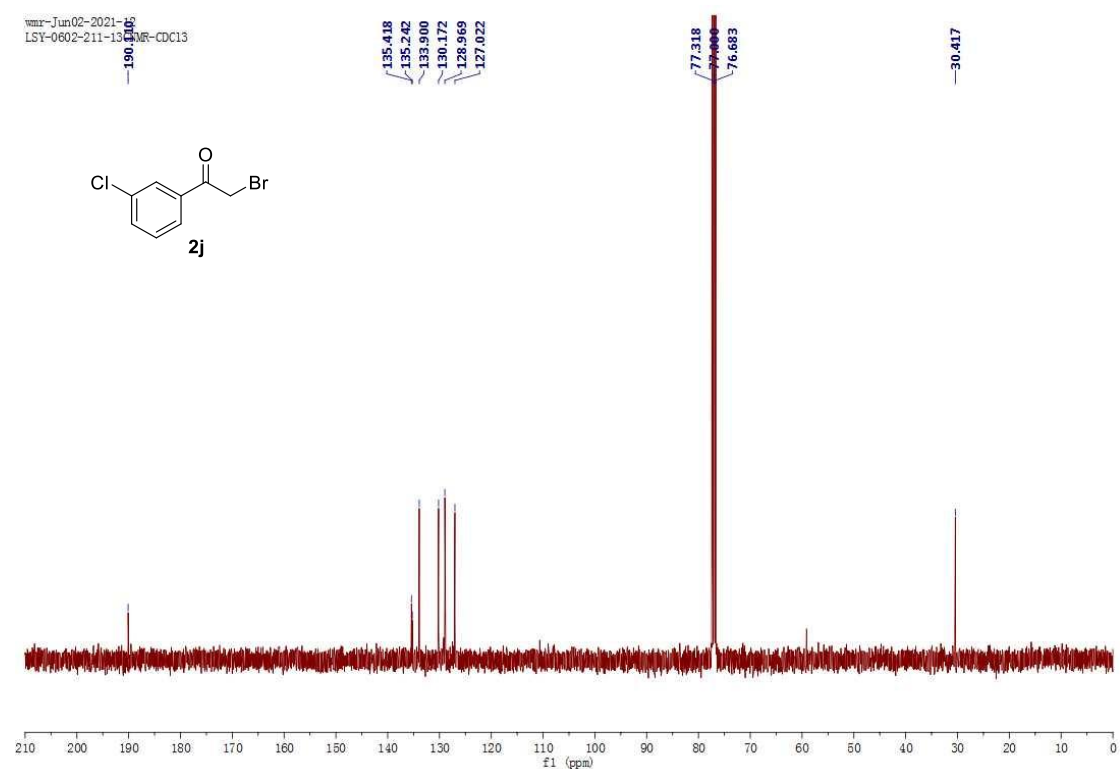

<sup>1</sup>H NMR (400 MHz, CDCl<sub>3</sub>)

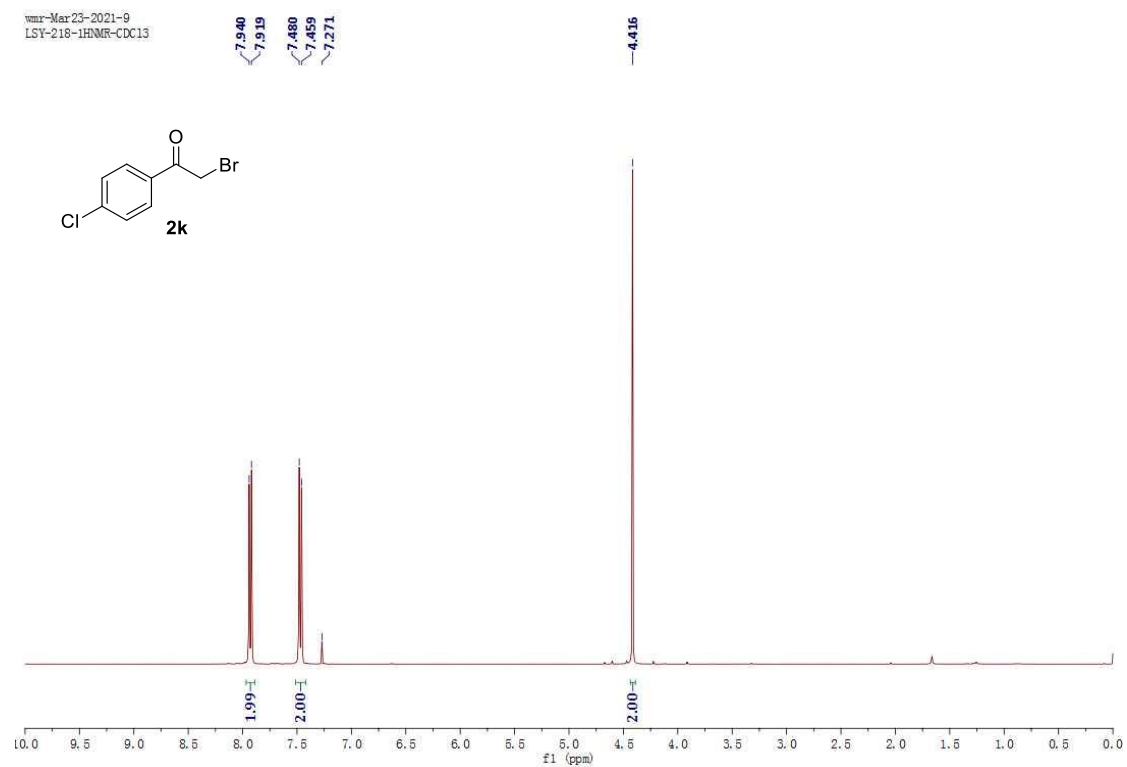

<sup>13</sup>C NMR (100 MHz, CDCl<sub>3</sub>)

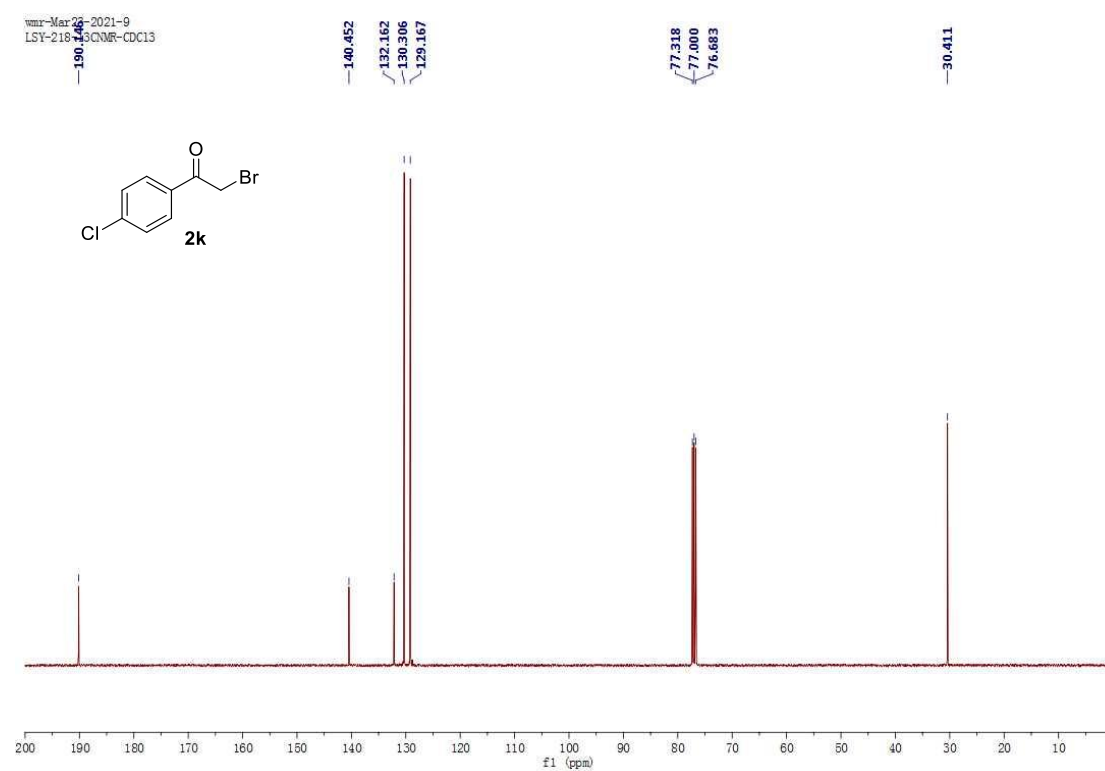

<sup>1</sup>H NMR (500 MHz, CDCl<sub>3</sub>)

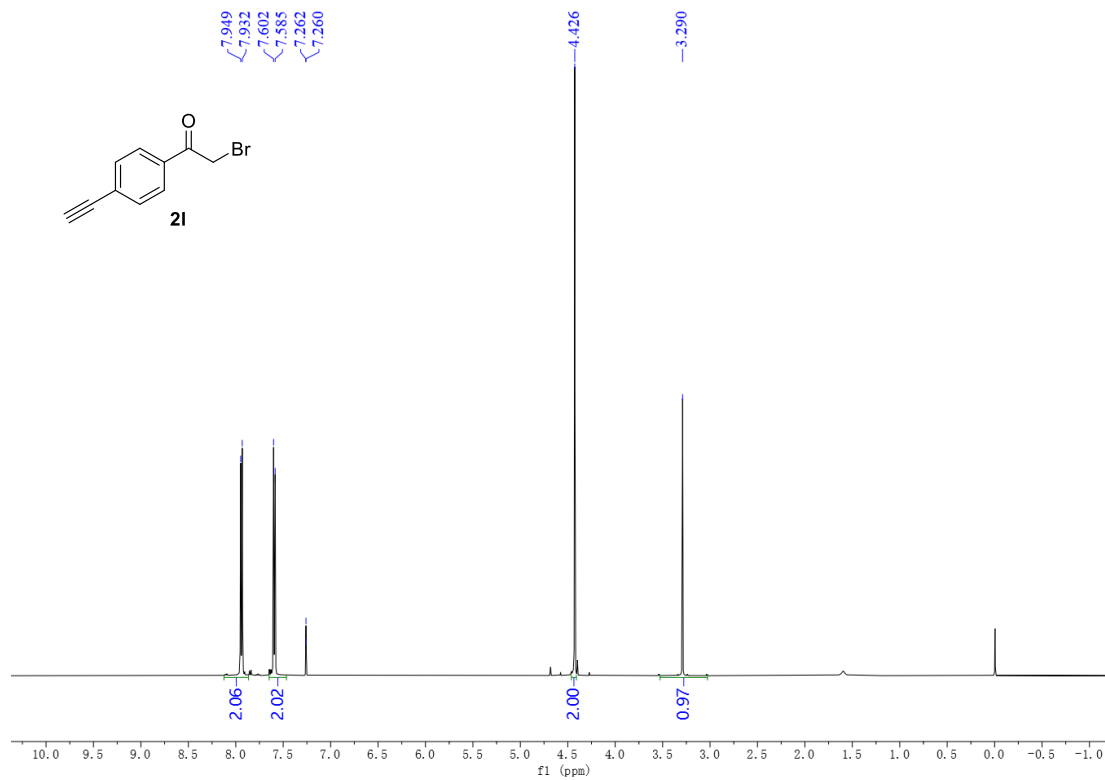

<sup>13</sup>C NMR (100 MHz, CDCl<sub>3</sub>)

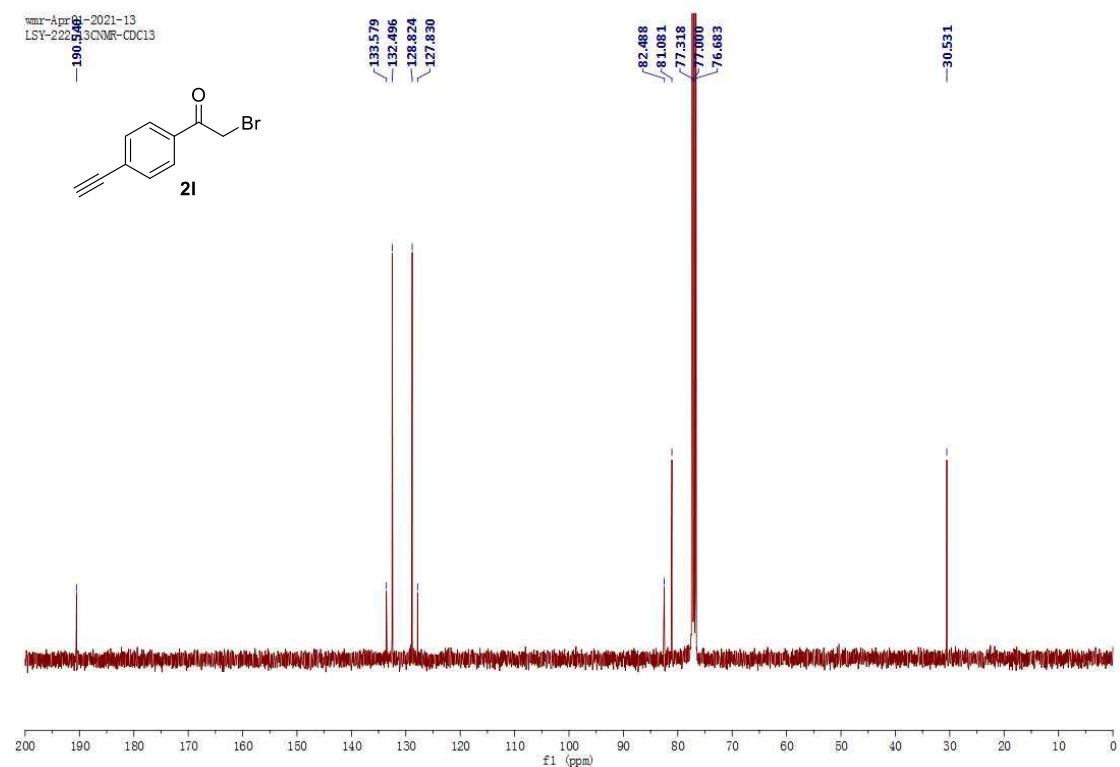

<sup>1</sup>H NMR (400 MHz, CDCl<sub>3</sub>)

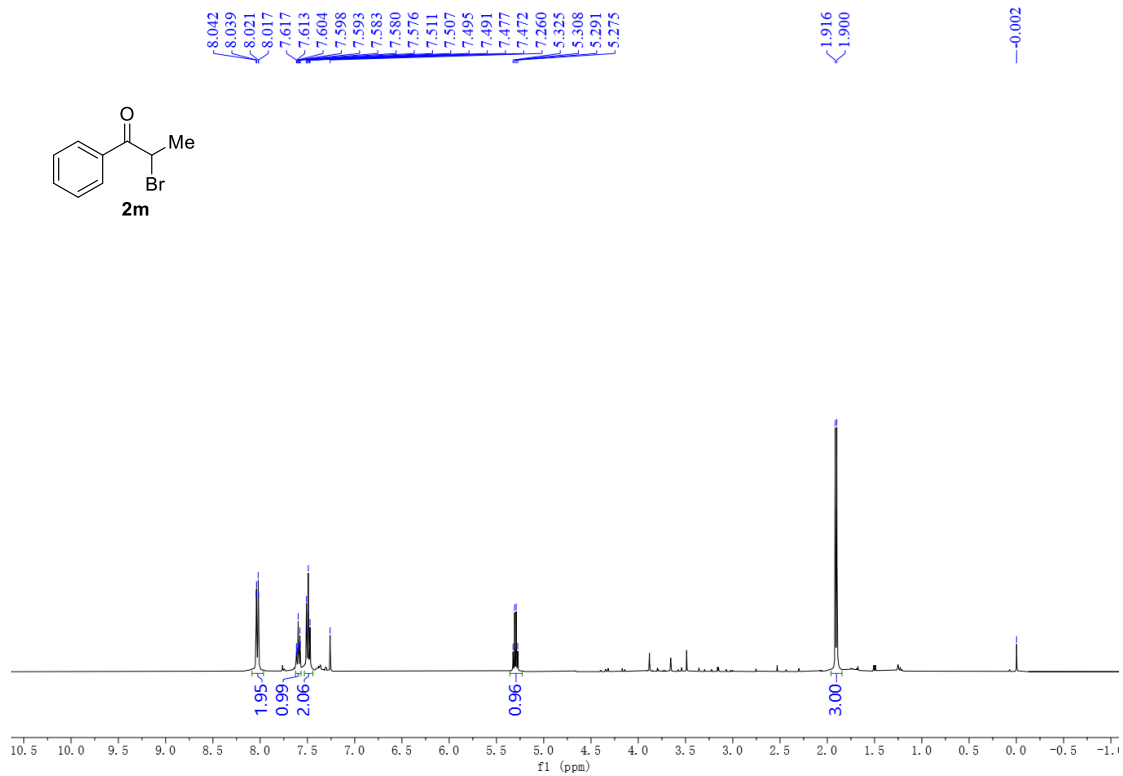

<sup>13</sup>C NMR (100 MHz, CDCl<sub>3</sub>)

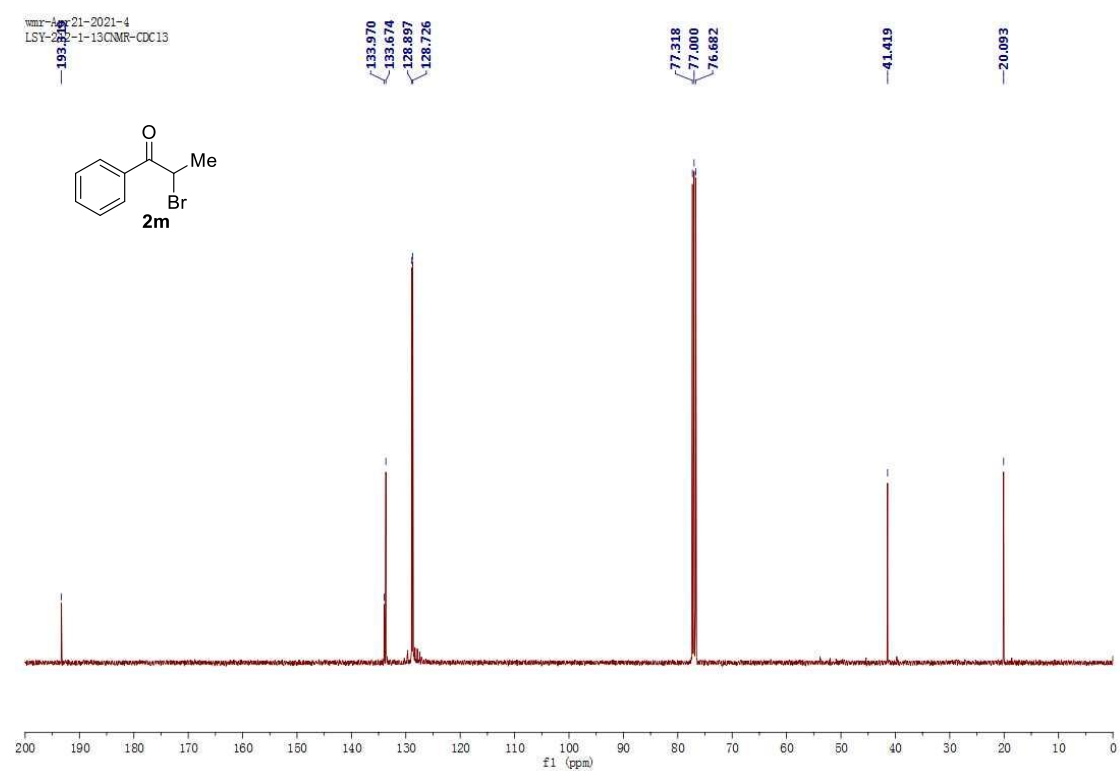

<sup>1</sup>H NMR (400 MHz, CDCl<sub>3</sub>)

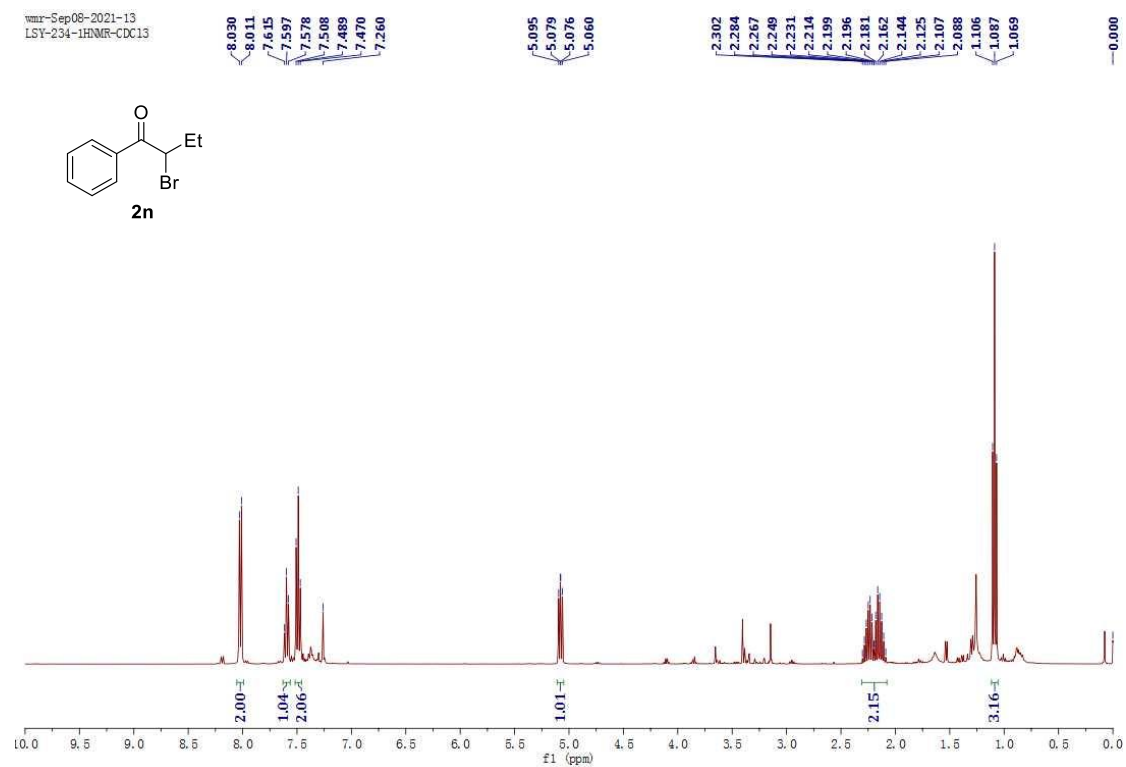

<sup>13</sup>C NMR (100 MHz, CDCl<sub>3</sub>)

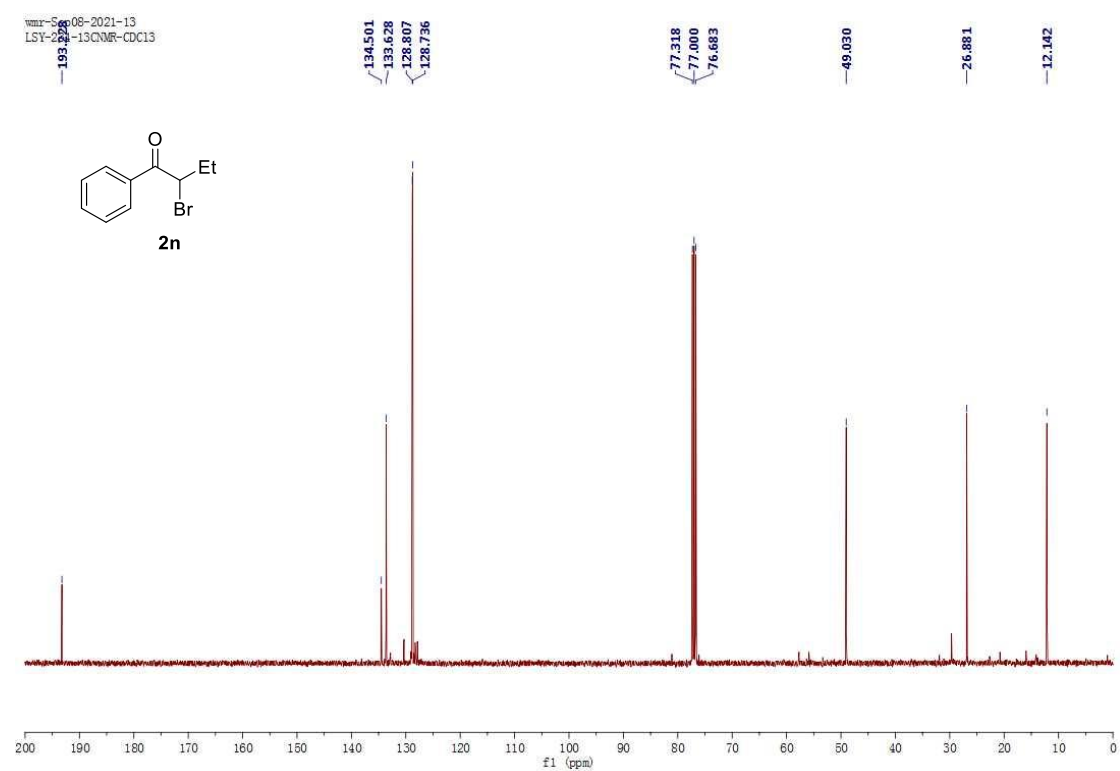

<sup>1</sup>H NMR (400 MHz, CDCl<sub>3</sub>)

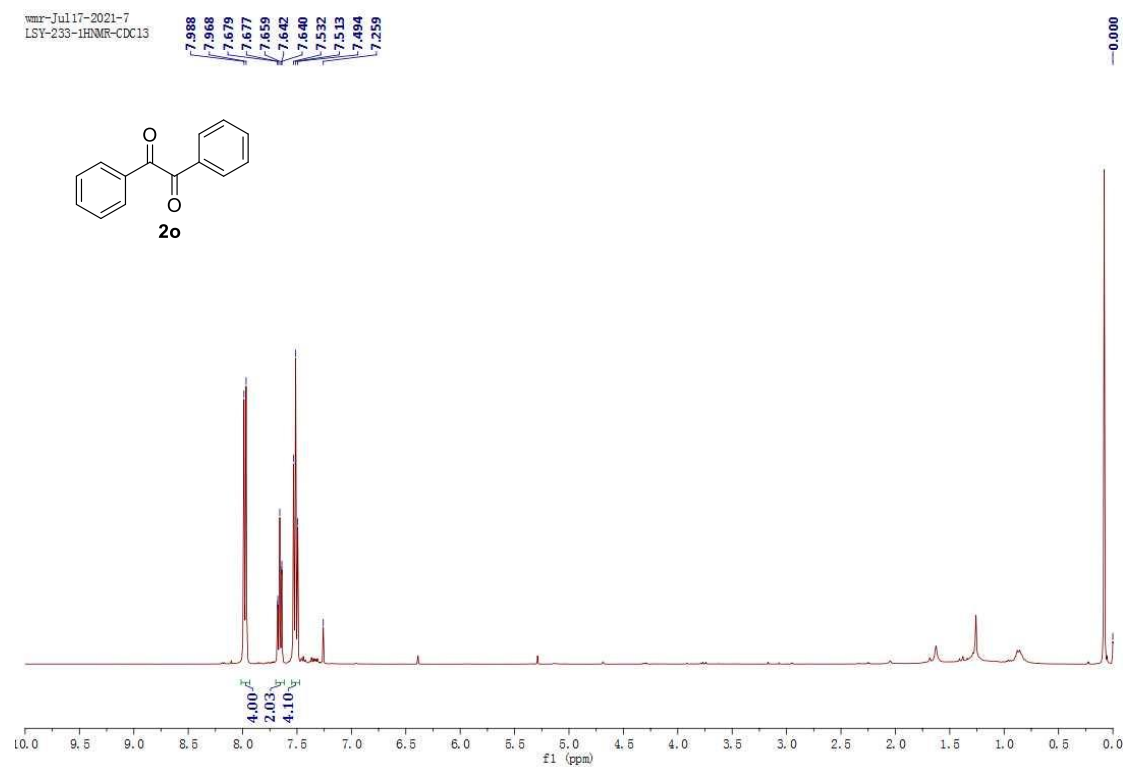

# <sup>13</sup>C NMR (100 MHz, CDCl<sub>3</sub>)

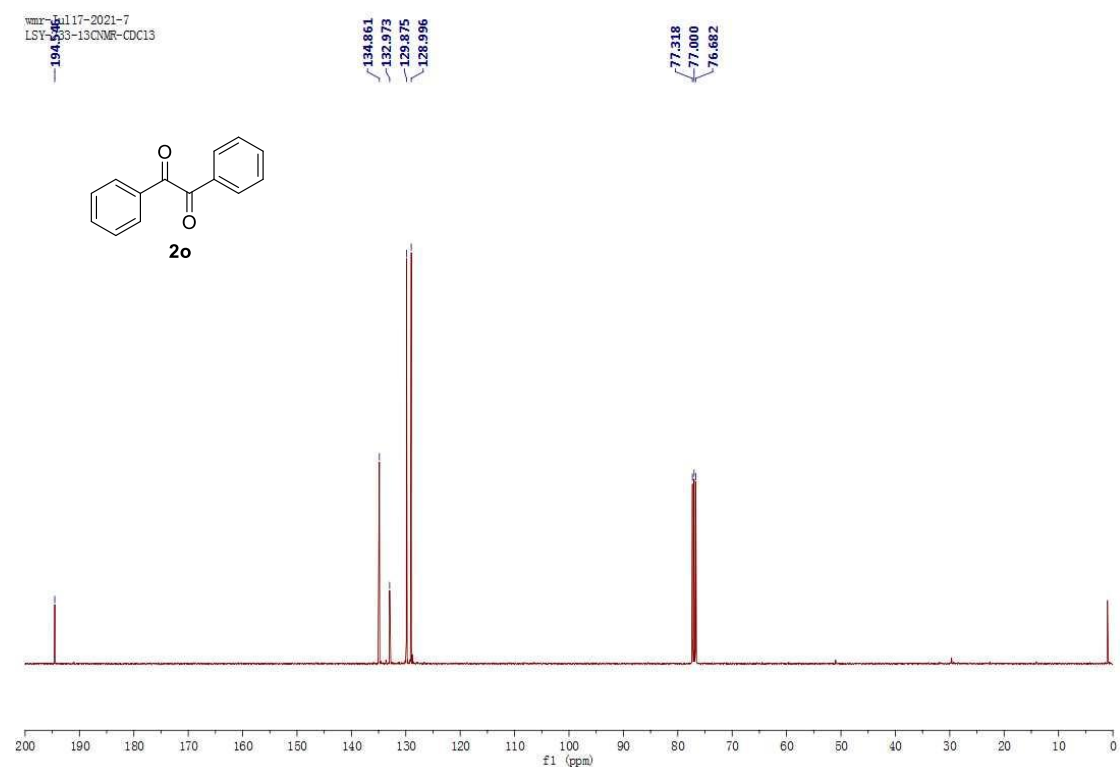

# <sup>1</sup>H NMR (400 MHz, CDCl<sub>3</sub>)

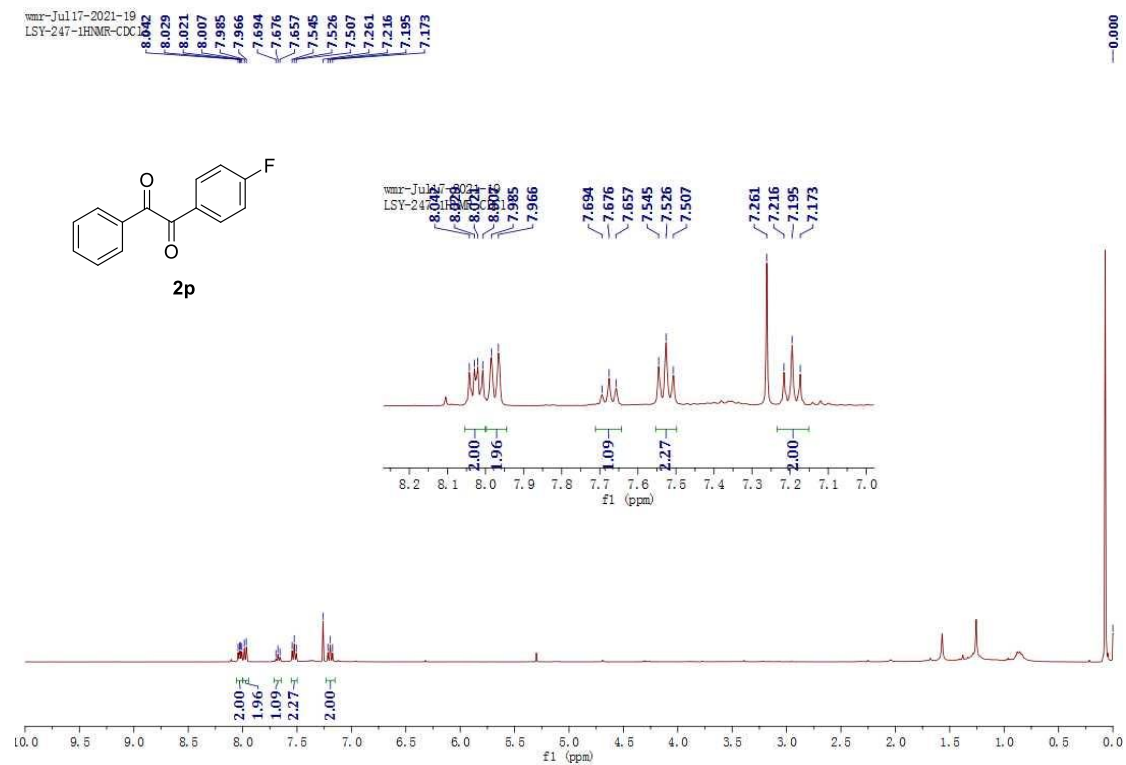

<sup>13</sup>C NMR (100 MHz, CDCl<sub>3</sub>)

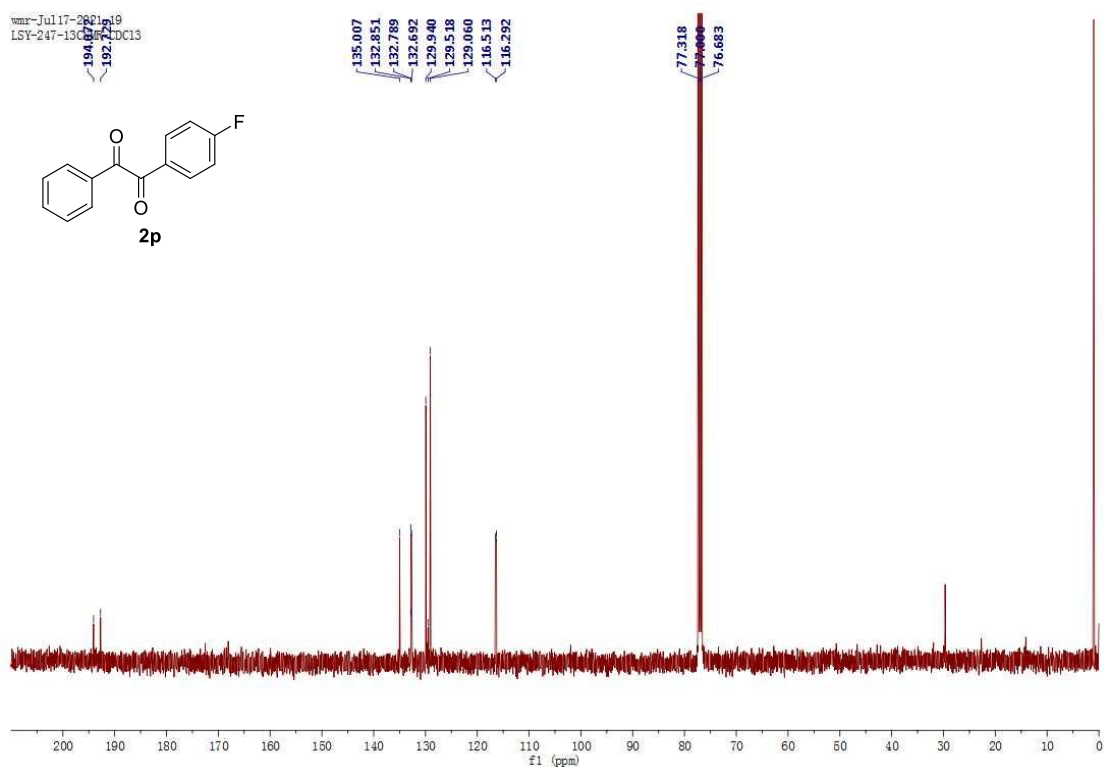

<sup>19</sup>F NMR (377 MHz, CDCl<sub>3</sub>)

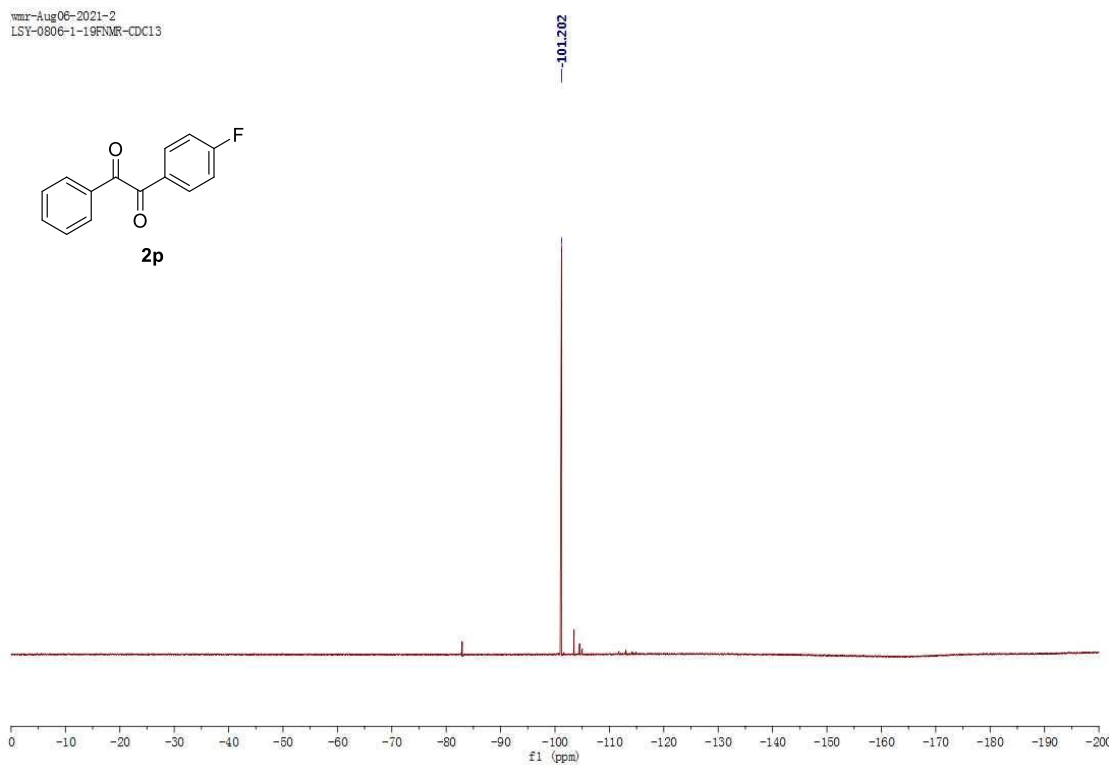

# <sup>1</sup>H NMR (400 MHz, CDCl<sub>3</sub>)

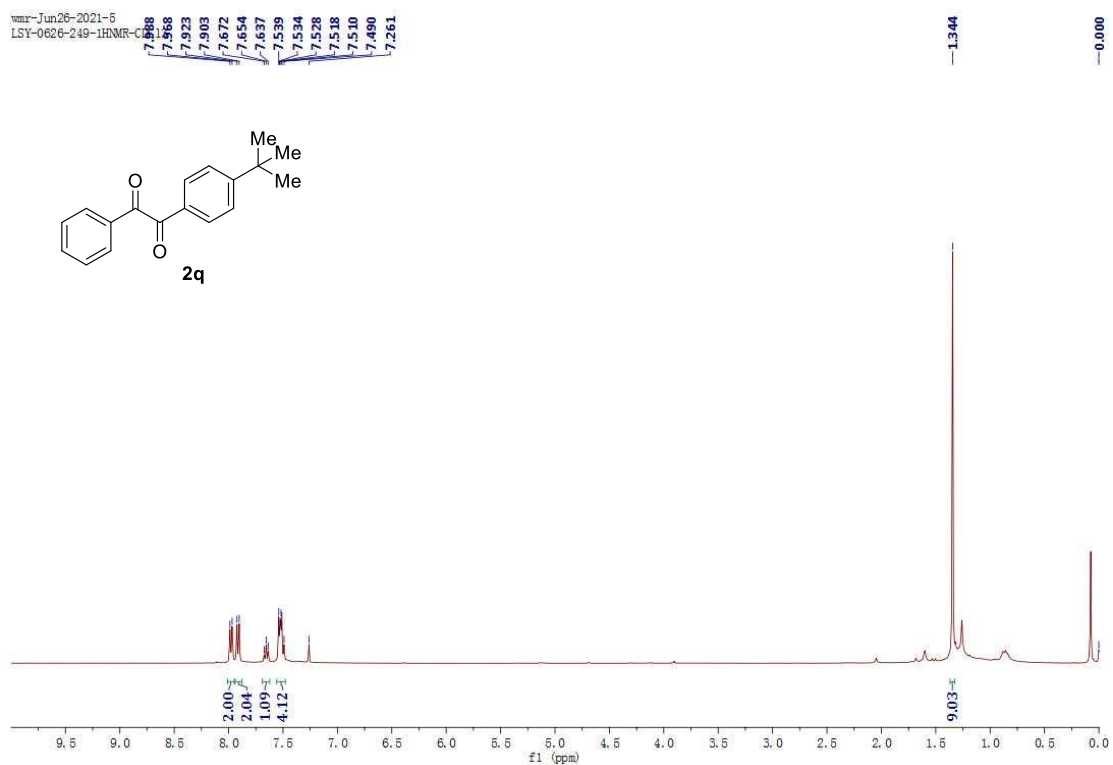

# <sup>13</sup>C NMR (100 MHz, CDCl<sub>3</sub>)

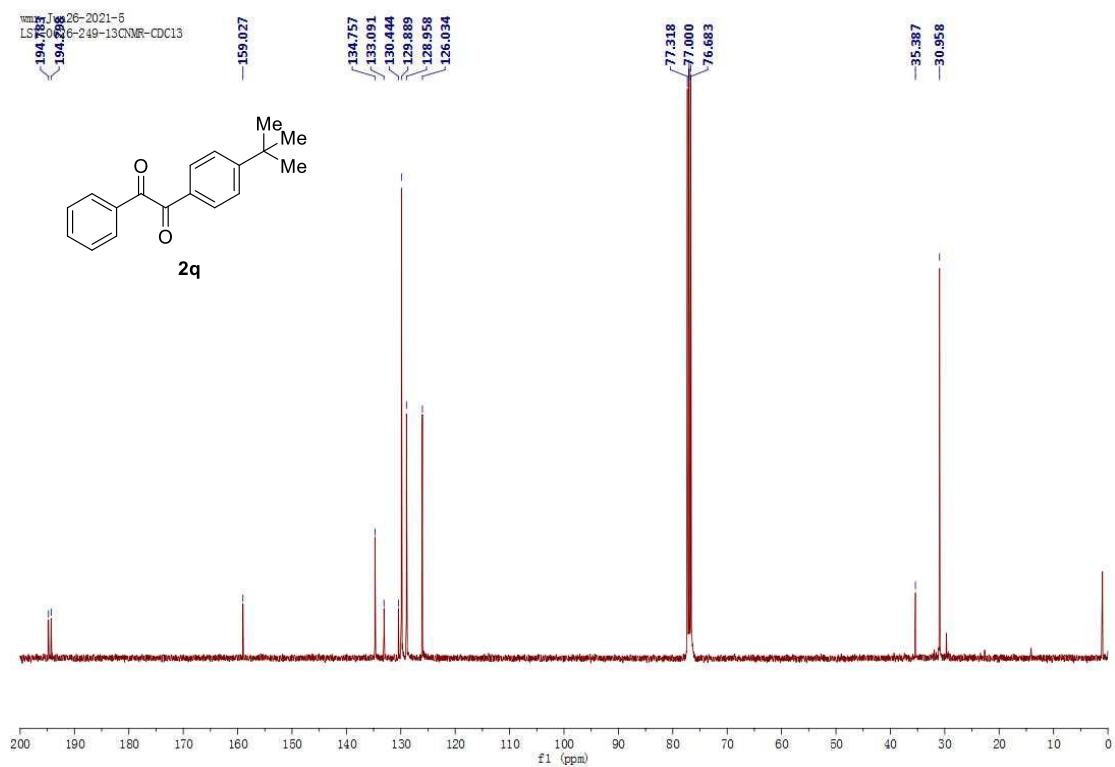

$^1\text{H}$  NMR (500 MHz,  $\text{CDCl}_3$ )

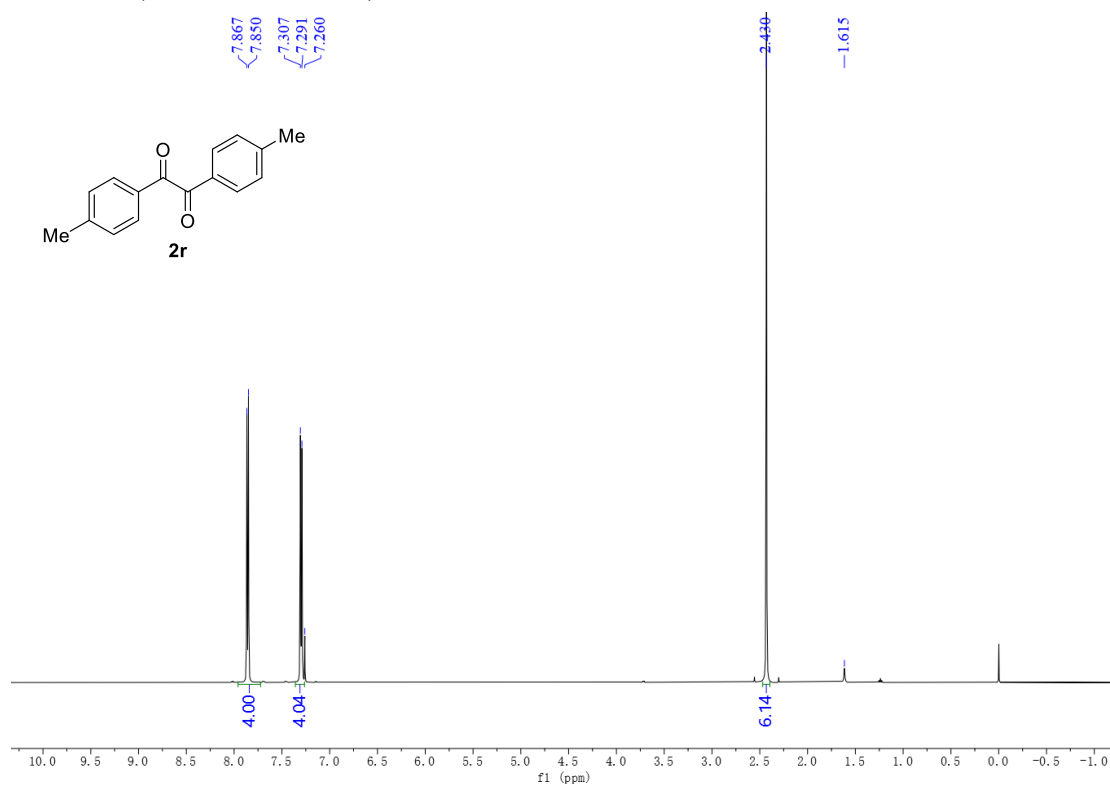

$^{13}\text{C}$  NMR (100 MHz,  $\text{CDCl}_3$ )

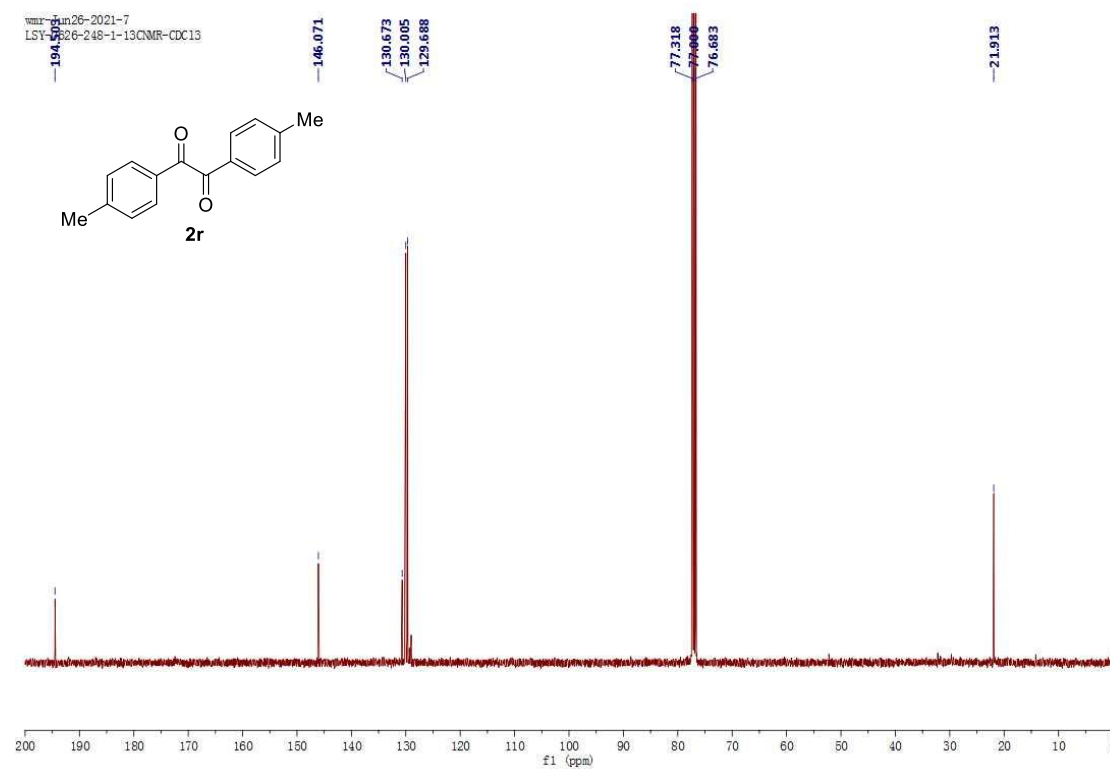

# $^1\text{H}$ NMR (400 MHz, $\text{CDCl}_3$ )

nmr-Jul17-2021-4  
LST-203- $^1\text{H}$ NMR- $\text{CDCl}_3$

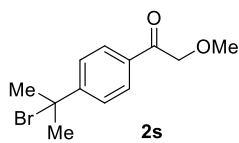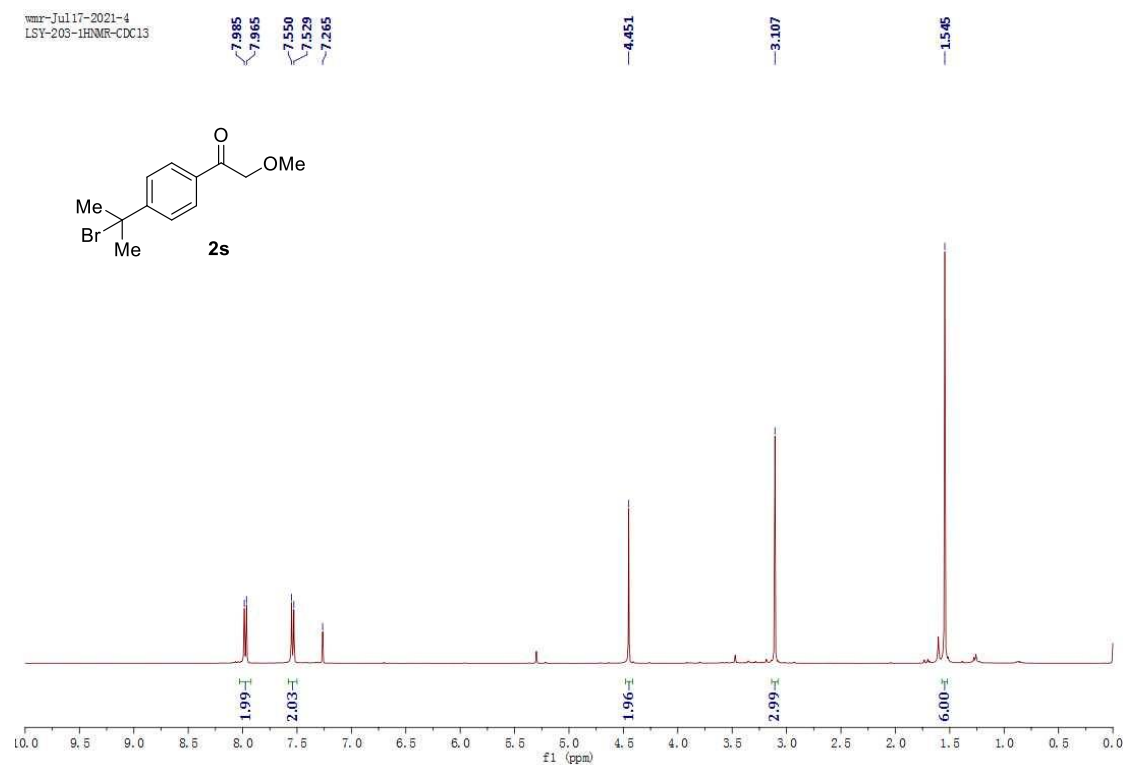

# $^{13}\text{C}$ NMR (100 MHz, $\text{CDCl}_3$ )

nmr-Jul17-2021-4  
LST-203- $^{13}\text{C}$ NMR- $\text{CDCl}_3$

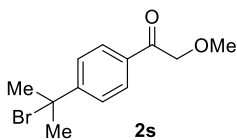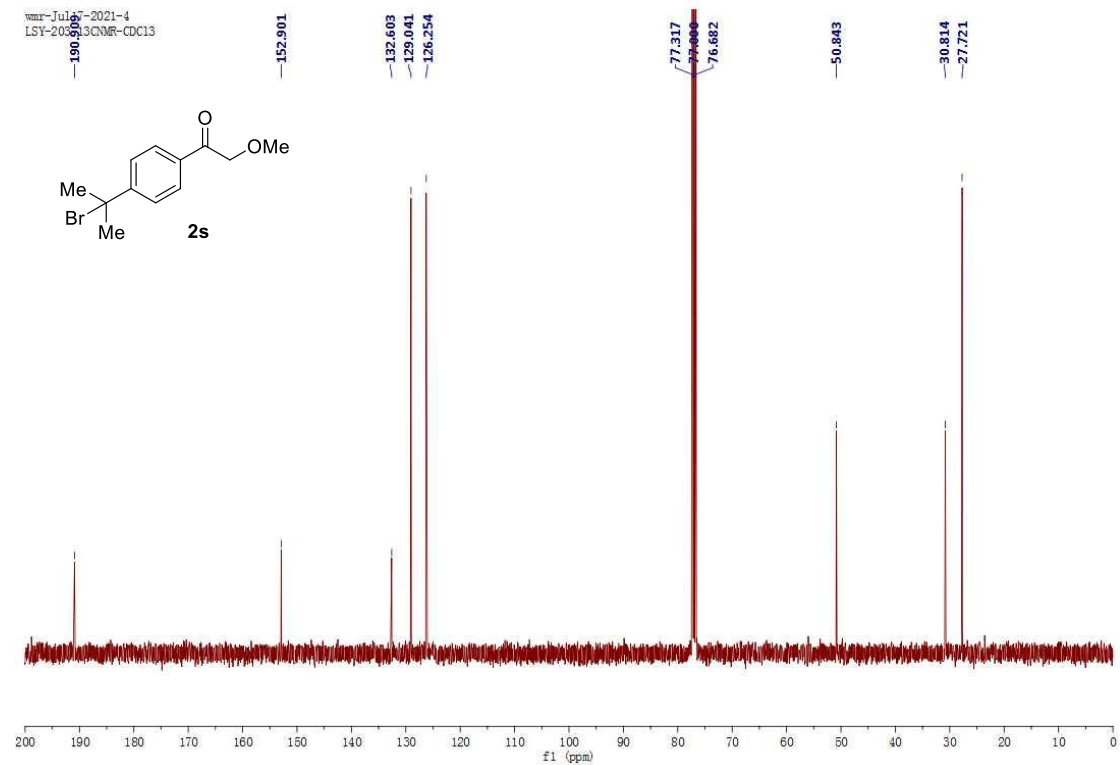

$^1\text{H}$  NMR (400 MHz,  $\text{DMSO-}d_6$ )

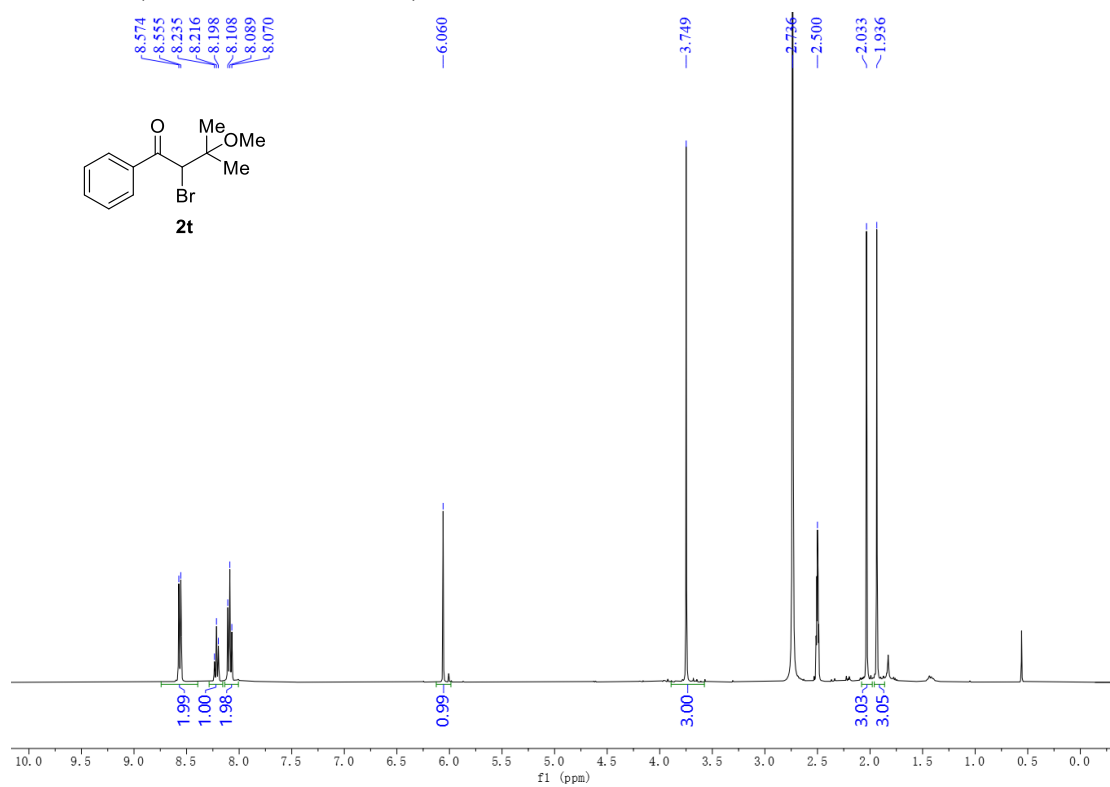

$^{13}\text{C}$  NMR (100 MHz,  $\text{CDCl}_3$ )

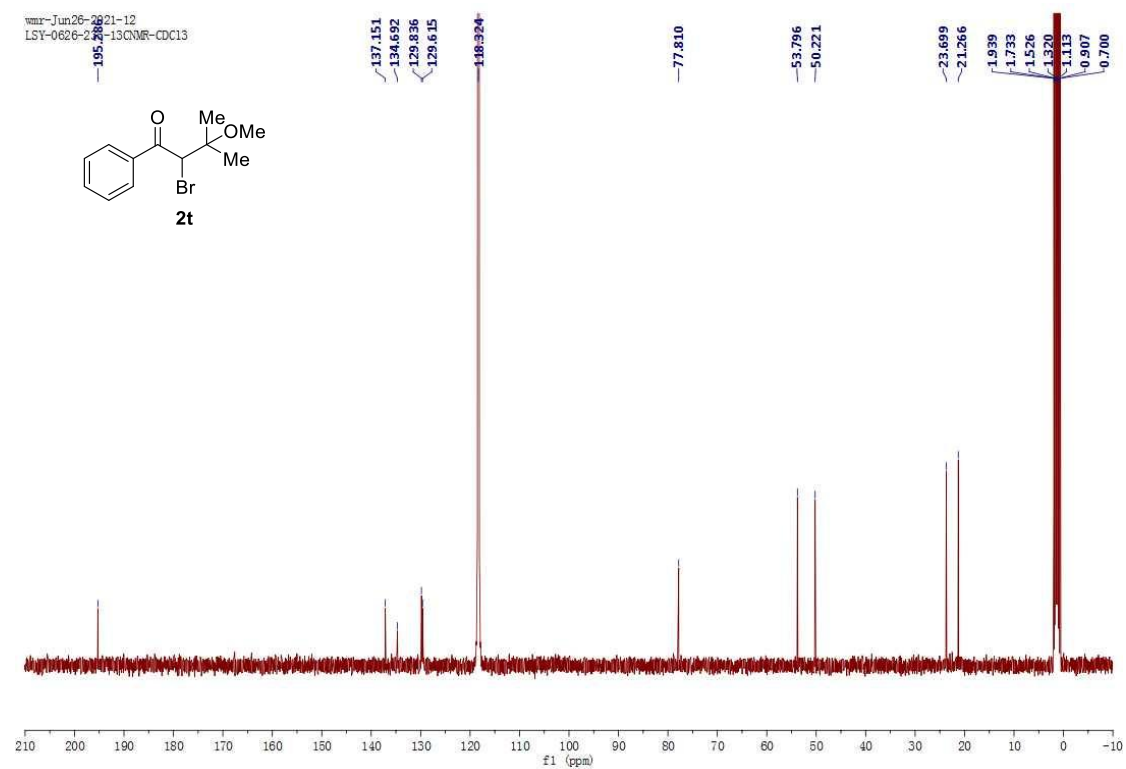

$^1\text{H}$  NMR (400 MHz,  $\text{CDCl}_3$ )

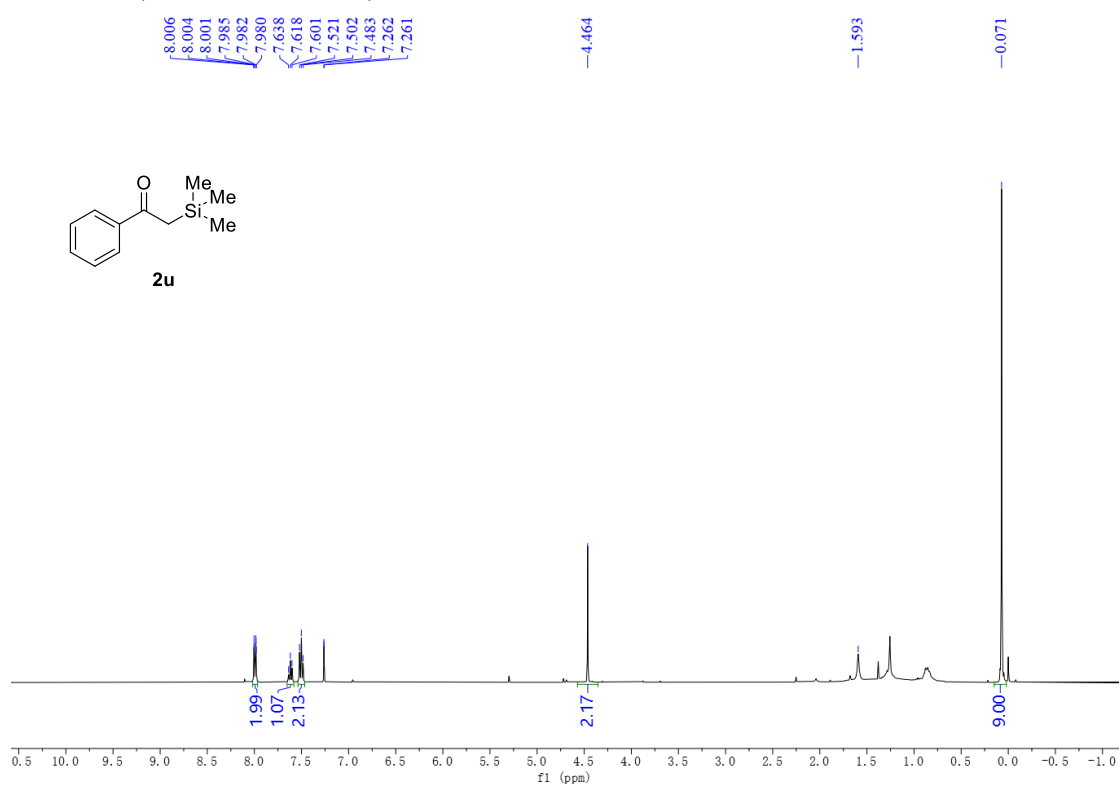

$^{13}\text{C}$  NMR (100 MHz,  $\text{CDCl}_3$ )

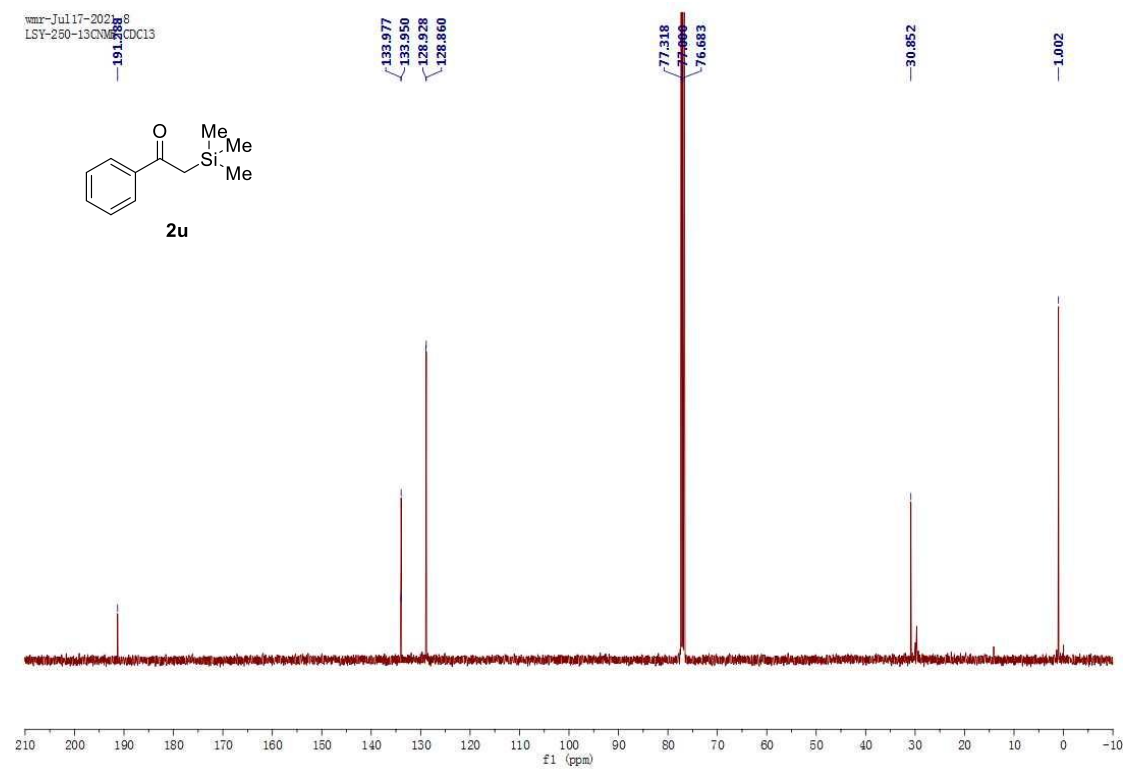

# $^1\text{H}$ NMR (400 MHz, $\text{CDCl}_3$ )

wmr-Jan12-2022-1  
LSY-Y1-2-1HNMR- $\text{CDCl}_3$

7.819  
7.801  
7.797  
7.599  
7.540  
7.522  
7.471  
7.452  
7.434  
7.271  
6.328  
6.217

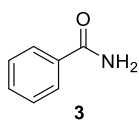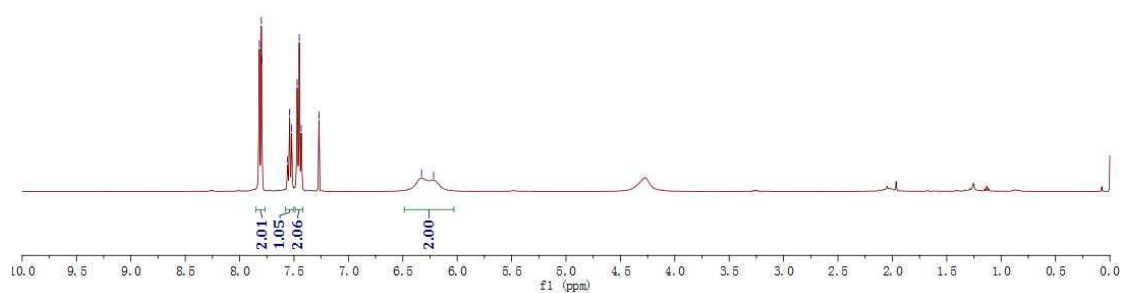

# $^{13}\text{C}$ NMR (100 MHz, $\text{CDCl}_3$ )

wmr-Jan12-2022-1  
LSY-Y1-2-13CNMR- $\text{CDCl}_3$

169.819

133.133  
132.065  
128.619  
127.284

77.317  
77.000  
76.682

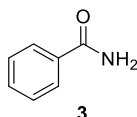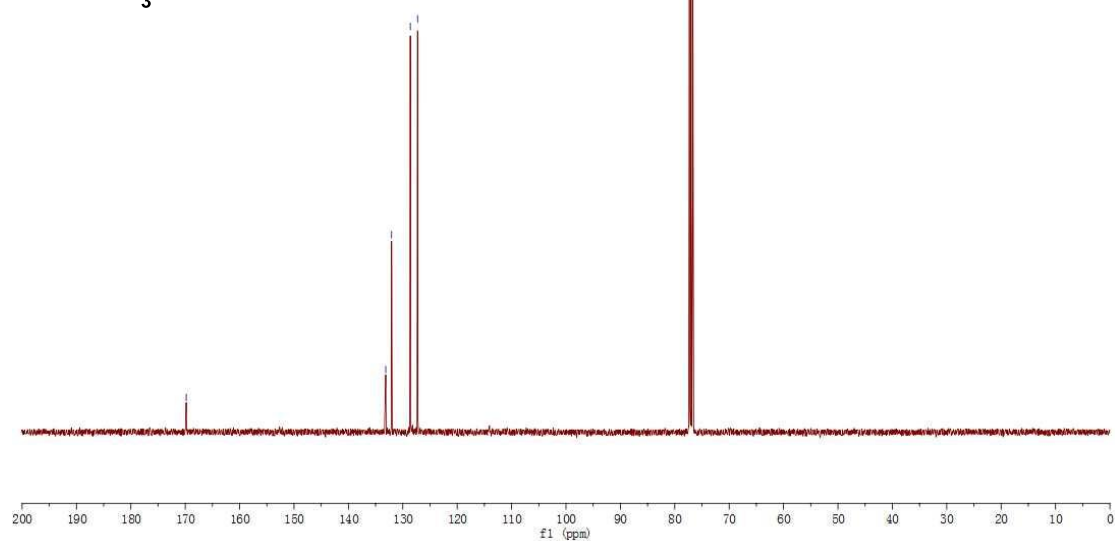

$^1\text{H}$  NMR (400 MHz,  $\text{CDCl}_3$ )

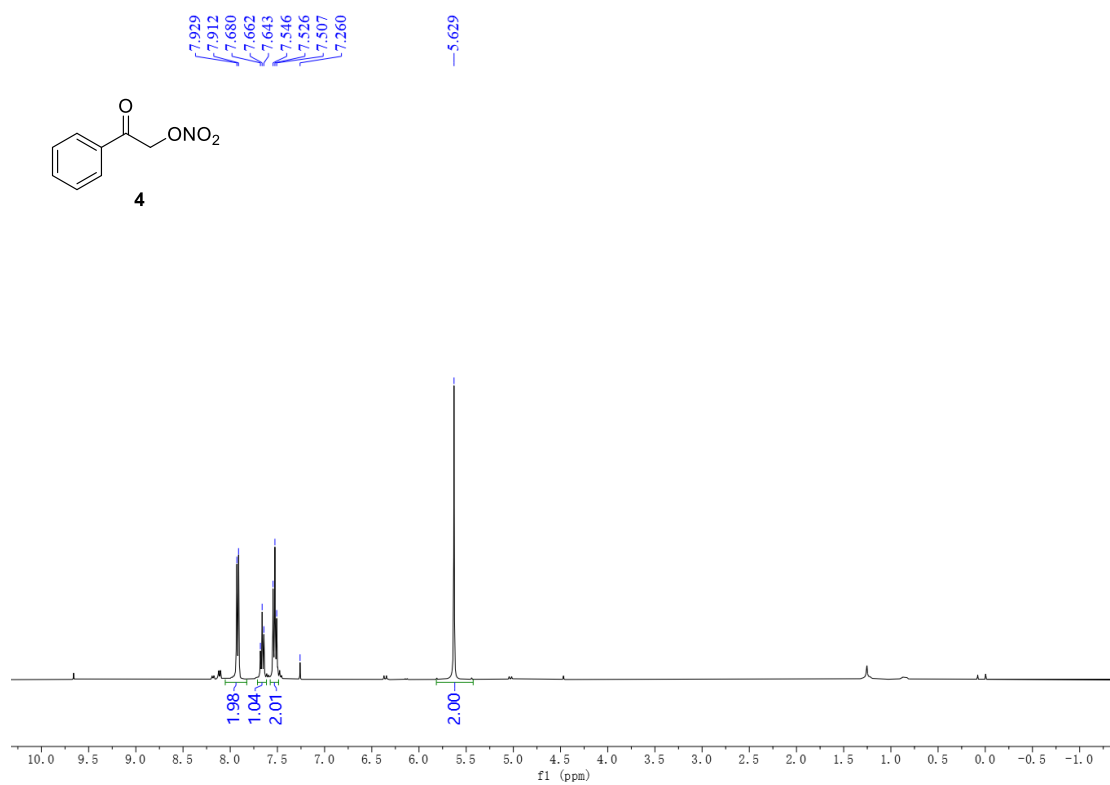

$^{13}\text{C}$  NMR (100 MHz,  $\text{CDCl}_3$ )

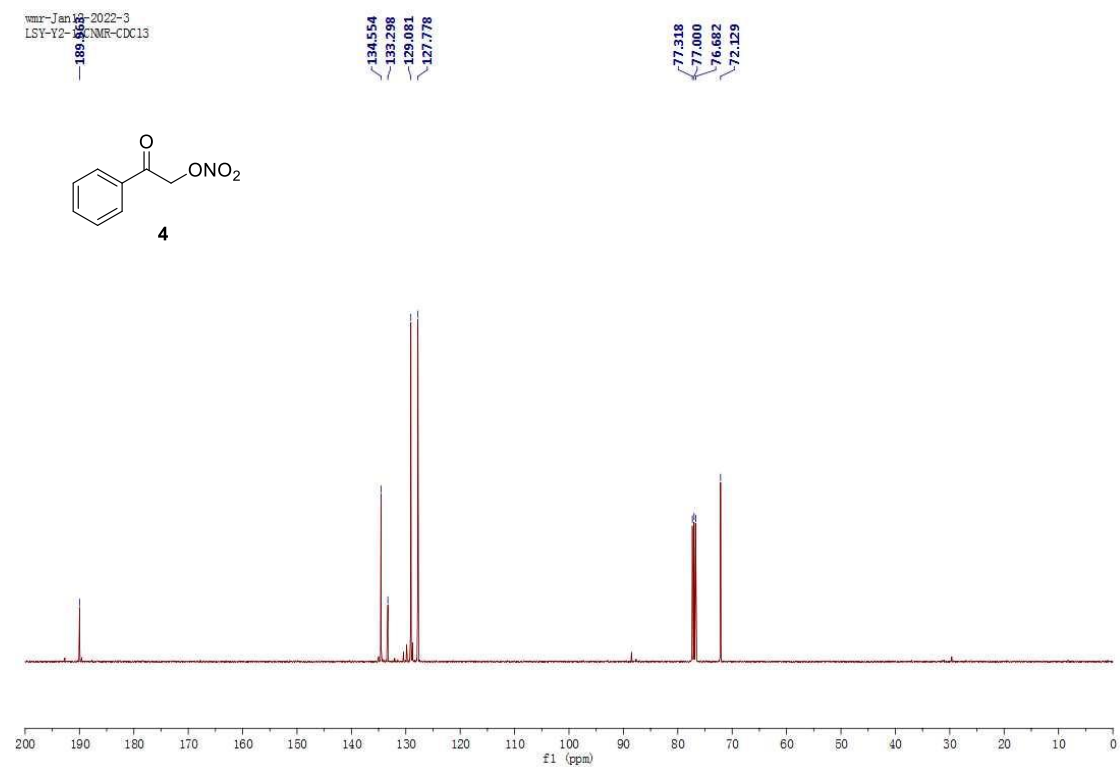

# <sup>1</sup>H NMR (400 MHz, CDCl<sub>3</sub>)

nmr-Jan05-2022-23  
LST-Y3-0105-1H-NMR-CDCl3

7.931  
7.912  
7.909  
7.635  
7.617  
7.598  
7.515  
7.495  
7.476  
7.263

5.349

2.239

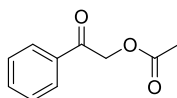

5

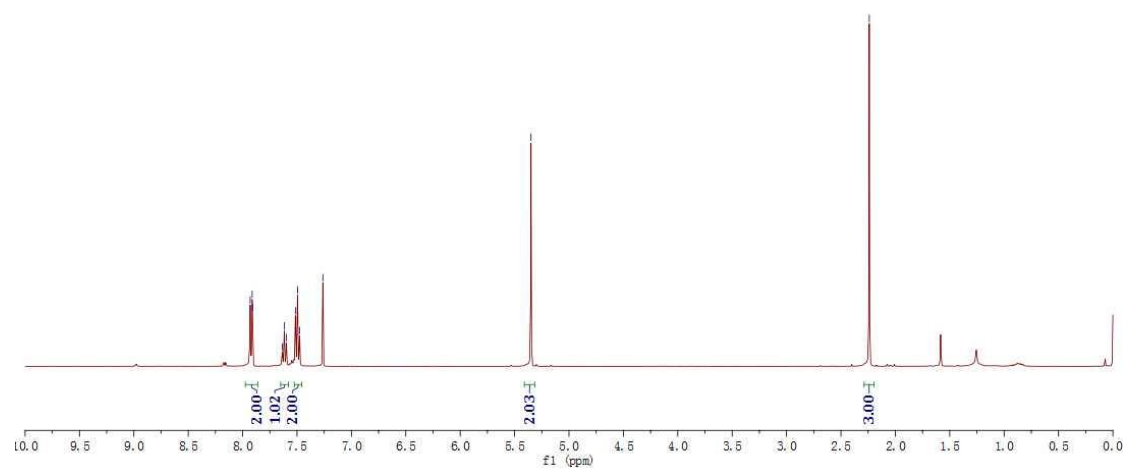

# <sup>13</sup>C NMR (100 MHz, CDCl<sub>3</sub>)

nmr-Jan05-2022-23  
LST-Y3-0105-13C-NMR-CDCl3

192.328

170.437

134.178

133.899

128.861

127.747

77.318

77.000

76.683

66.007

20.582

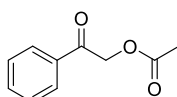

5

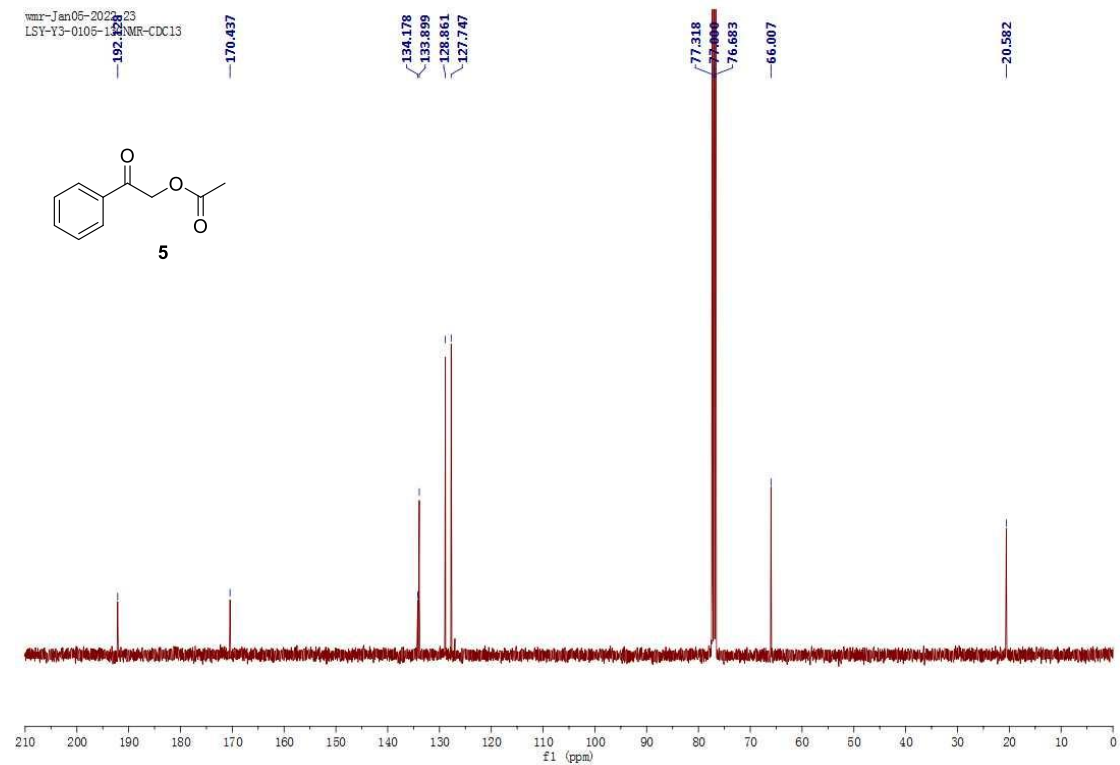

# <sup>1</sup>H NMR (400 MHz, CDCl<sub>3</sub>)

nmr-Jan12-2022-5  
LST-Y6-1H-NMR-CDCl3

7.989  
7.971  
7.601  
7.583  
7.564  
7.488  
7.469  
7.450  
7.274

4.258  
4.244  
4.237  
4.223  
3.775  
3.747  
3.722  
3.701  
3.567  
3.553  
3.521  
3.389

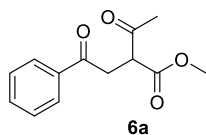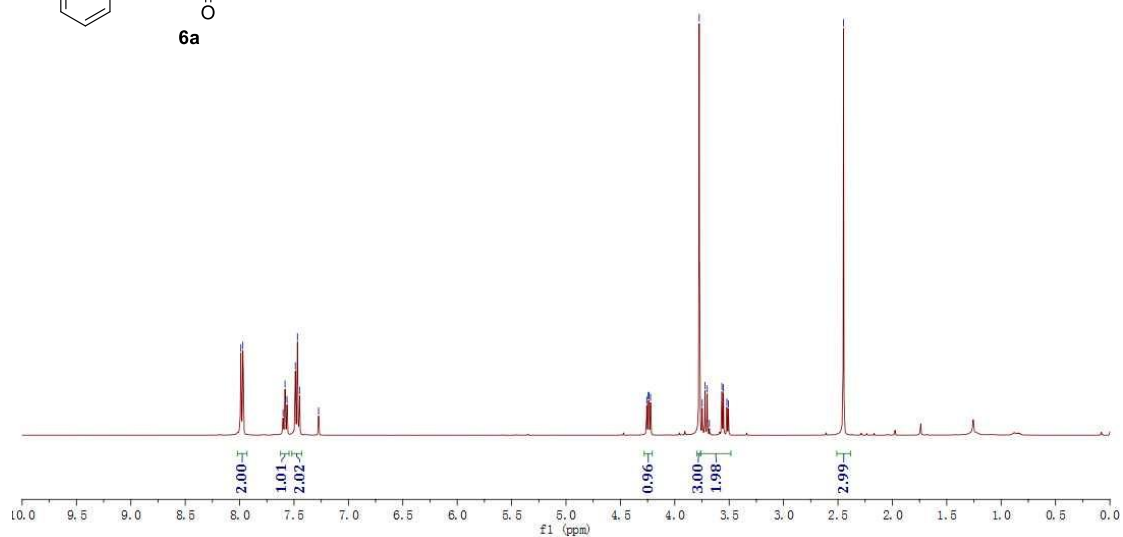

# <sup>13</sup>C NMR (100 MHz, CDCl<sub>3</sub>)

nmr-Jan12-2022-5  
LST-Y6-13C-NMR-CDCl3

202.615  
197.615

169.353

135.874  
133.495  
128.606  
128.080

77.318  
77.000  
76.682

53.528  
52.710

37.405  
30.276

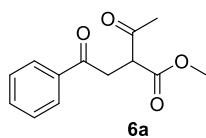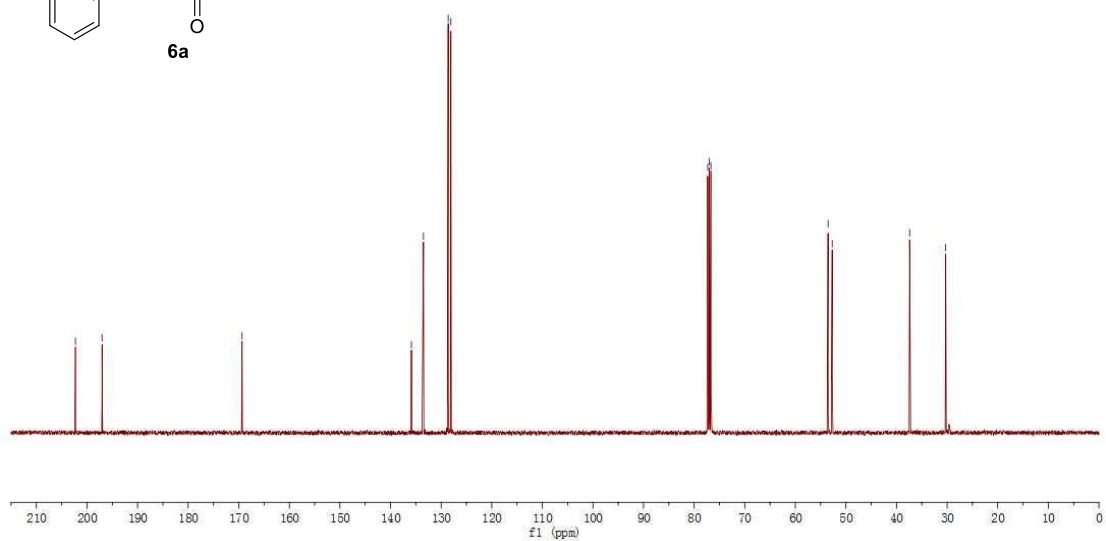

# $^1\text{H}$ NMR (400 MHz, $\text{CDCl}_3$ )

nmr-Jan12-2022-4  
LST-Y4-1H-NMR- $\text{CDCl}_3$

7.992  
7.973  
7.599  
7.581  
7.562  
7.487  
7.468  
7.449  
7.275

4.255  
4.245  
4.237  
4.231  
4.219  
4.210  
4.201  
3.758  
3.738  
3.712  
3.692  
3.558  
3.544  
3.512  
3.498  
2.451

1.313  
1.295  
1.277

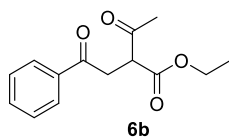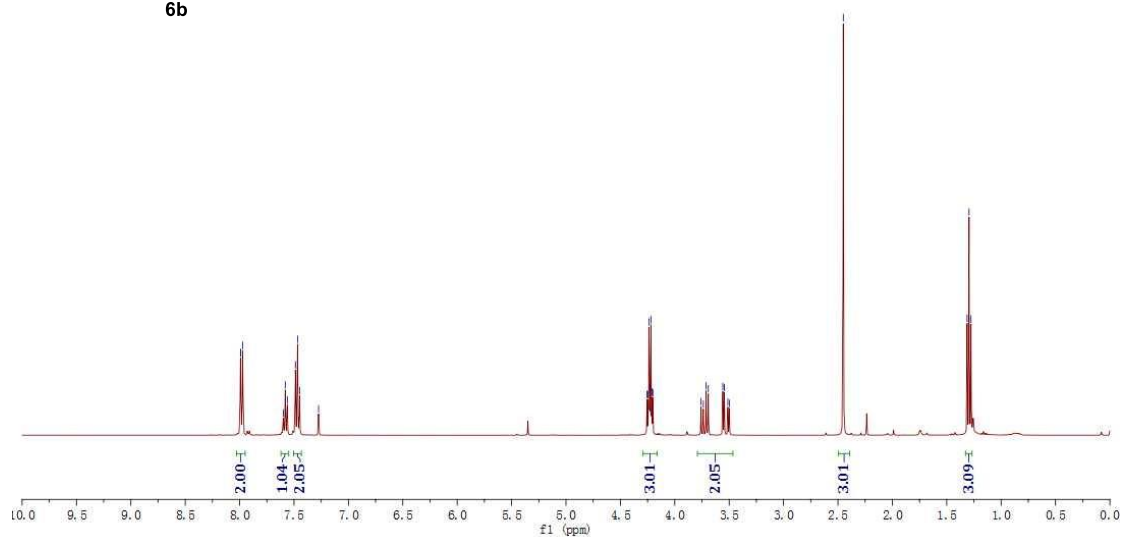

# $^{13}\text{C}$ NMR (100 MHz, $\text{CDCl}_3$ )

nmr-Jan12-2022-4  
LST-Y4-13C-NMR- $\text{CDCl}_3$

202.088  
197.088

168.838

135.946  
133.451  
128.591  
128.076

61.719

53.779

37.332

30.260

13.982

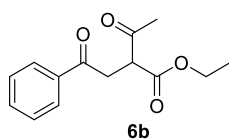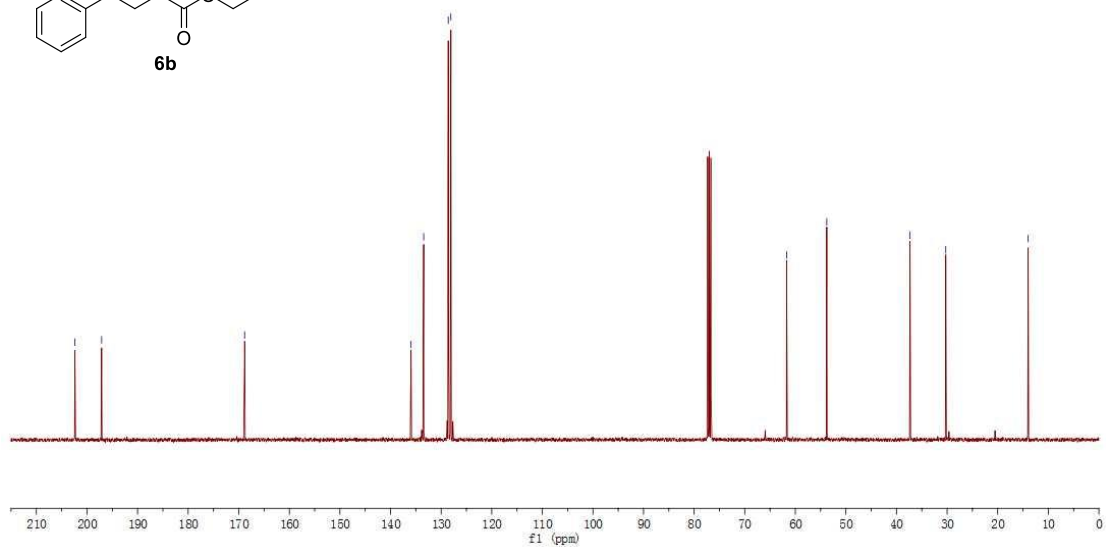

Supplement: d6ob00329j1.pdf [file d6ob00329j1.pdf]
